# Supplementary material
Source: publisher figshare collection journal article supplement (https://gsajournals.figshare.com/ndownloader/files/10708489)
Supplement: Supplementary file 1 [file 10708489]

## Sheet: Table S9 Y12xYJM975 Recombinant
##Row: The row in the 1536 array image (32 rows x48 columns)
##Col: The column in the 1536 array image
##Name: The strain designation, in the format NuclearMito. The reference strain is designated by and is YPS681.
##Media: The media type
##Temp: The temperature that this array was grown at in degrees Celsius
##Array: "D" indicating these strains were part of the mitochondrial recombinants in the Y12xYJM975 cross
##Condition: Media_Temp
##Nuc: The nuclear genotype of the strain
##Mito: The mitochondrial haplotype of the strain
##size_diff: The size of the colony at 48 hours minus the initial size
Row	Col	Name	Media	Temp	Array	Condition	Nuc	Mito	size_diff
3	3	YJM975YJM975 rho YJM975/Y12 G1 d114	YPD	30	D	YPD_30	YJM975YJM975	YJM975/Y12	179876
4	3	YJM975YJM975 rho YJM975/Y12 G1 d132	YPD	30	D	YPD_30	YJM975YJM975	YJM975/Y12	194041
6	3	YJM975YJM975 rho YJM975/Y12 G1 d112	YPD	30	D	YPD_30	YJM975YJM975	YJM975/Y12	212726
7	3	YJM975YJM975 rho YJM975/Y12 G1 d126	YPD	30	D	YPD_30	YJM975YJM975	YJM975/Y12	216223
9	3	YJM975YJM975 rho YJM975/Y12 G1 d132	YPD	30	D	YPD_30	YJM975YJM975	YJM975/Y12	214285
10	3	YJM975YJM975 rho YJM975/Y12 G1 d118	YPD	30	D	YPD_30	YJM975YJM975	YJM975/Y12	234131
11	3	YJM975YJM975 rho YJM975/Y12 G1 d91	YPD	30	D	YPD_30	YJM975YJM975	YJM975/Y12	232403
12	3	YJM975YJM975 rho YJM975/Y12 G1 d104	YPD	30	D	YPD_30	YJM975YJM975	YJM975/Y12	228340
13	3	YJM975YJM975 rho YJM975/Y12 G1 d106	YPD	30	D	YPD_30	YJM975YJM975	YJM975/Y12	237634
14	3	YJM975YJM975 rho YJM975/Y12 G1 d98	YPD	30	D	YPD_30	YJM975YJM975	YJM975/Y12	234423
15	3	YJM975YJM975 rho YJM975/Y12 G1 d87	YPD	30	D	YPD_30	YJM975YJM975	YJM975/Y12	236995
16	3	YJM975YJM975 rho YJM975/Y12 G1 d92	YPD	30	D	YPD_30	YJM975YJM975	YJM975/Y12	218824
17	3	YJM975YJM975 rho YJM975/Y12 G1 d127	YPD	30	D	YPD_30	YJM975YJM975	YJM975/Y12	212878
18	3	YJM975YJM975 rho YJM975/Y12 G1 d91	YPD	30	D	YPD_30	YJM975YJM975	YJM975/Y12	227845
19	3	by	YPD	30	D	YPD_30	by	by	254983
20	3	YJM975YJM975 rho YJM975/Y12 G1 d114	YPD	30	D	YPD_30	YJM975YJM975	YJM975/Y12	255115
21	3	YJM975YJM975 rho YJM975/Y12 G1 d96	YPD	30	D	YPD_30	YJM975YJM975	YJM975/Y12	237389
22	3	YJM975YJM975 rho YJM975/Y12 G1 d114	YPD	30	D	YPD_30	YJM975YJM975	YJM975/Y12	226576
23	3	YJM975YJM975 rho YJM975 control d1	YPD	30	D	YPD_30	YJM975YJM975	YJM975	238465
24	3	YJM975YJM975 rho YJM975/Y12 G1 d132	YPD	30	D	YPD_30	YJM975YJM975	YJM975/Y12	218031
25	3	YJM975YJM975 rho YJM975/Y12 G1 d123	YPD	30	D	YPD_30	YJM975YJM975	YJM975/Y12	236019
26	3	YJM975YJM975 rho YJM975/Y12 G1 d126	YPD	30	D	YPD_30	YJM975YJM975	YJM975/Y12	235771
28	3	YJM975YJM975 rho YJM975/Y12 G1 d105	YPD	30	D	YPD_30	YJM975YJM975	YJM975/Y12	270697
29	3	YJM975YJM975 rho Y12 control d1	YPD	30	D	YPD_30	YJM975YJM975	Y12	266746
30	3	YJM975YJM975 rho YJM975/Y12 G1 d119	YPD	30	D	YPD_30	YJM975YJM975	YJM975/Y12	249401
3	4	YJM975YJM975 rho YJM975/Y12 G1 d88	YPD	30	D	YPD_30	YJM975YJM975	YJM975/Y12	196136
4	4	YJM975YJM975 rho YJM975/Y12 G1 d112	YPD	30	D	YPD_30	YJM975YJM975	YJM975/Y12	197545
5	4	YJM975YJM975 rho YJM975/Y12 G1 d116	YPD	30	D	YPD_30	YJM975YJM975	YJM975/Y12	215291
6	4	YJM975YJM975 rho YJM975/Y12 G1 d115	YPD	30	D	YPD_30	YJM975YJM975	YJM975/Y12	223033
7	4	YJM975YJM975 rho YJM975/Y12 G1 d89	YPD	30	D	YPD_30	YJM975YJM975	YJM975/Y12	213244
8	4	YJM975YJM975 rho YJM975/Y12 G1 d128	YPD	30	D	YPD_30	YJM975YJM975	YJM975/Y12	215561
9	4	YJM975YJM975 rho YJM975/Y12 G1 d94	YPD	30	D	YPD_30	YJM975YJM975	YJM975/Y12	221142
10	4	YJM975YJM975 rho YJM975/Y12 G1 d116	YPD	30	D	YPD_30	YJM975YJM975	YJM975/Y12	226058
11	4	YJM975YJM975 rho YJM975/Y12 G1 d97	YPD	30	D	YPD_30	YJM975YJM975	YJM975/Y12	215356
12	4	YJM975YJM975 rho YJM975/Y12 G1 d124	YPD	30	D	YPD_30	YJM975YJM975	YJM975/Y12	245175
13	4	YJM975YJM975 rho YJM975/Y12 G1 d88	YPD	30	D	YPD_30	YJM975YJM975	YJM975/Y12	234129
14	4	by	YPD	30	D	YPD_30	by	by	243217
15	4	YJM975YJM975 rho YJM975/Y12 G1 d132	YPD	30	D	YPD_30	YJM975YJM975	YJM975/Y12	249815
16	4	YJM975YJM975 rho YJM975/Y12 G1 d123	YPD	30	D	YPD_30	YJM975YJM975	YJM975/Y12	234554
17	4	YJM975YJM975 rho YJM975/Y12 G1 d129	YPD	30	D	YPD_30	YJM975YJM975	YJM975/Y12	222245
18	4	YJM975YJM975 rho YJM975/Y12 G1 d128	YPD	30	D	YPD_30	YJM975YJM975	YJM975/Y12	277144
19	4	YJM975YJM975 rho YJM975/Y12 G1 d118	YPD	30	D	YPD_30	YJM975YJM975	YJM975/Y12	234851
20	4	YJM975YJM975 rho YJM975/Y12 G1 d128	YPD	30	D	YPD_30	YJM975YJM975	YJM975/Y12	228355
21	4	YJM975YJM975 rho YJM975/Y12 G1 d100	YPD	30	D	YPD_30	YJM975YJM975	YJM975/Y12	275055
22	4	YJM975YJM975 rho YJM975/Y12 G1 d107	YPD	30	D	YPD_30	YJM975YJM975	YJM975/Y12	271880
23	4	YJM975YJM975 rho YJM975/Y12 G1 d128	YPD	30	D	YPD_30	YJM975YJM975	YJM975/Y12	274412
24	4	YJM975YJM975 rho YJM975/Y12 G1 d119	YPD	30	D	YPD_30	YJM975YJM975	YJM975/Y12	276801
25	4	YJM975YJM975 rho YJM975 control d1	YPD	30	D	YPD_30	YJM975YJM975	YJM975	230773
26	4	YJM975YJM975 rho YJM975/Y12 G1 d107	YPD	30	D	YPD_30	YJM975YJM975	YJM975/Y12	278220
27	4	YJM975YJM975 rho YJM975/Y12 G1 d108	YPD	30	D	YPD_30	YJM975YJM975	YJM975/Y12	279912
28	4	YJM975YJM975 rho YJM975/Y12 G1 d122	YPD	30	D	YPD_30	YJM975YJM975	YJM975/Y12	278074
29	4	YJM975YJM975 rho YJM975/Y12 G1 d114	YPD	30	D	YPD_30	YJM975YJM975	YJM975/Y12	217988
30	4	YJM975YJM975 rho YJM975/Y12 G1 d94	YPD	30	D	YPD_30	YJM975YJM975	YJM975/Y12	258921
3	5	YJM975YJM975 rho YJM975/Y12 G1 d106	YPD	30	D	YPD_30	YJM975YJM975	YJM975/Y12	210058
4	5	YJM975YJM975 rho YJM975/Y12 G1 d109	YPD	30	D	YPD_30	YJM975YJM975	YJM975/Y12	206575
5	5	YJM975YJM975 rho YJM975/Y12 G1 d92	YPD	30	D	YPD_30	YJM975YJM975	YJM975/Y12	224705
6	5	YJM975YJM975 rho YJM975/Y12 G1 d89	YPD	30	D	YPD_30	YJM975YJM975	YJM975/Y12	225189
7	5	YJM975YJM975 rho YJM975/Y12 G1 d90	YPD	30	D	YPD_30	YJM975YJM975	YJM975/Y12	225100
8	5	YJM975YJM975 rho YJM975/Y12 G1 d122	YPD	30	D	YPD_30	YJM975YJM975	YJM975/Y12	231189
9	5	YJM975YJM975 rho YJM975/Y12 G1 d91	YPD	30	D	YPD_30	YJM975YJM975	YJM975/Y12	240921
10	5	YJM975YJM975 rho YJM975/Y12 G1 d110	YPD	30	D	YPD_30	YJM975YJM975	YJM975/Y12	244157
11	5	YJM975YJM975 rho YJM975 control d1	YPD	30	D	YPD_30	YJM975YJM975	YJM975	244923
12	5	by	YPD	30	D	YPD_30	by	by	226330
13	5	YJM975YJM975 rho Y12 control d1	YPD	30	D	YPD_30	YJM975YJM975	Y12	252220
14	5	YJM975YJM975 rho Y12 control d1	YPD	30	D	YPD_30	YJM975YJM975	Y12	257071
15	5	by	YPD	30	D	YPD_30	by	by	236605
16	5	YJM975YJM975 rho YJM975/Y12 G1 d116	YPD	30	D	YPD_30	YJM975YJM975	YJM975/Y12	231096
17	5	YJM975YJM975 rho YJM975/Y12 G1 d126	YPD	30	D	YPD_30	YJM975YJM975	YJM975/Y12	229409
18	5	YJM975YJM975 rho YJM975/Y12 G1 d89	YPD	30	D	YPD_30	YJM975YJM975	YJM975/Y12	228340
20	5	YJM975YJM975 rho YJM975/Y12 G1 d105	YPD	30	D	YPD_30	YJM975YJM975	YJM975/Y12	222166
21	5	YJM975YJM975 rho YJM975/Y12 G1 d87	YPD	30	D	YPD_30	YJM975YJM975	YJM975/Y12	231766
22	5	YJM975YJM975 rho Y12 control d2	YPD	30	D	YPD_30	YJM975YJM975	Y12	232856
23	5	YJM975YJM975 rho YJM975/Y12 G1 d83	YPD	30	D	YPD_30	YJM975YJM975	YJM975/Y12	240231
24	5	YJM975YJM975 rho YJM975/Y12 G1 d126	YPD	30	D	YPD_30	YJM975YJM975	YJM975/Y12	285958
25	5	YJM975YJM975 rho YJM975/Y12 G1 d100	YPD	30	D	YPD_30	YJM975YJM975	YJM975/Y12	279861
26	5	YJM975YJM975 rho YJM975/Y12 G1 d117	YPD	30	D	YPD_30	YJM975YJM975	YJM975/Y12	269616
27	5	YJM975YJM975 rho YJM975/Y12 G1 d129	YPD	30	D	YPD_30	YJM975YJM975	YJM975/Y12	252581
28	5	YJM975YJM975 rho YJM975/Y12 G1 d113	YPD	30	D	YPD_30	YJM975YJM975	YJM975/Y12	270796
29	5	YJM975YJM975 rho YJM975/Y12 G1 d83	YPD	30	D	YPD_30	YJM975YJM975	YJM975/Y12	264162
30	5	YJM975YJM975 rho YJM975/Y12 G1 d127	YPD	30	D	YPD_30	YJM975YJM975	YJM975/Y12	260576
3	6	YJM975YJM975 rho YJM975/Y12 G1 d91	YPD	30	D	YPD_30	YJM975YJM975	YJM975/Y12	198070
4	6	YJM975YJM975 rho YJM975/Y12 G1 d122	YPD	30	D	YPD_30	YJM975YJM975	YJM975/Y12	216578
5	6	YJM975YJM975 rho YJM975/Y12 G1 d117	YPD	30	D	YPD_30	YJM975YJM975	YJM975/Y12	215204
6	6	YJM975YJM975 rho YJM975/Y12 G1 d109	YPD	30	D	YPD_30	YJM975YJM975	YJM975/Y12	228743
7	6	YJM975YJM975 rho YJM975 control d2	YPD	30	D	YPD_30	YJM975YJM975	YJM975	243505
8	6	YJM975YJM975 rho YJM975/Y12 G1 d94	YPD	30	D	YPD_30	YJM975YJM975	YJM975/Y12	242431
9	6	YJM975YJM975 rho YJM975/Y12 G1 d89	YPD	30	D	YPD_30	YJM975YJM975	YJM975/Y12	241047
11	6	YJM975YJM975 rho YJM975/Y12 G1 d83	YPD	30	D	YPD_30	YJM975YJM975	YJM975/Y12	260144
12	6	by	YPD	30	D	YPD_30	by	by	236783
13	6	YJM975YJM975 rho YJM975/Y12 G1 d128	YPD	30	D	YPD_30	YJM975YJM975	YJM975/Y12	235882
14	6	YJM975YJM975 rho YJM975/Y12 G1 d103	YPD	30	D	YPD_30	YJM975YJM975	YJM975/Y12	252633
16	6	YJM975YJM975 rho YJM975/Y12 G1 d114	YPD	30	D	YPD_30	YJM975YJM975	YJM975/Y12	245332
17	6	YJM975YJM975 rho YJM975/Y12 G1 d98	YPD	30	D	YPD_30	YJM975YJM975	YJM975/Y12	235874
18	6	YJM975YJM975 rho YJM975/Y12 G1 d98	YPD	30	D	YPD_30	YJM975YJM975	YJM975/Y12	223311
19	6	YJM975YJM975 rho YJM975/Y12 G1 d91	YPD	30	D	YPD_30	YJM975YJM975	YJM975/Y12	235177
20	6	YJM975YJM975 rho YJM975/Y12 G1 d126	YPD	30	D	YPD_30	YJM975YJM975	YJM975/Y12	233726
21	6	YJM975YJM975 rho YJM975/Y12 G1 d110	YPD	30	D	YPD_30	YJM975YJM975	YJM975/Y12	239975
22	6	YJM975YJM975 rho YJM975/Y12 G1 d102	YPD	30	D	YPD_30	YJM975YJM975	YJM975/Y12	223046
23	6	YJM975YJM975 rho YJM975/Y12 G1 d107	YPD	30	D	YPD_30	YJM975YJM975	YJM975/Y12	211729
24	6	YJM975YJM975 rho YJM975/Y12 G1 d113	YPD	30	D	YPD_30	YJM975YJM975	YJM975/Y12	226761
25	6	YJM975YJM975 rho YJM975/Y12 G1 d107	YPD	30	D	YPD_30	YJM975YJM975	YJM975/Y12	276633
26	6	YJM975YJM975 rho YJM975/Y12 G1 d108	YPD	30	D	YPD_30	YJM975YJM975	YJM975/Y12	219019
27	6	YJM975YJM975 rho YJM975/Y12 G1 d113	YPD	30	D	YPD_30	YJM975YJM975	YJM975/Y12	229000
28	6	YJM975YJM975 rho YJM975/Y12 G1 d129	YPD	30	D	YPD_30	YJM975YJM975	YJM975/Y12	238443
29	6	YJM975YJM975 rho YJM975/Y12 G1 d88	YPD	30	D	YPD_30	YJM975YJM975	YJM975/Y12	217971
30	6	YJM975YJM975 rho YJM975/Y12 G1 d115	YPD	30	D	YPD_30	YJM975YJM975	YJM975/Y12	279955
3	7	YJM975YJM975 rho YJM975/Y12 G1 d98	YPD	30	D	YPD_30	YJM975YJM975	YJM975/Y12	211260
4	7	YJM975YJM975 rho YJM975/Y12 G1 d97	YPD	30	D	YPD_30	YJM975YJM975	YJM975/Y12	209580
5	7	YJM975YJM975 rho YJM975/Y12 G1 d107	YPD	30	D	YPD_30	YJM975YJM975	YJM975/Y12	216385
6	7	YJM975YJM975 rho YJM975/Y12 G1 d101	YPD	30	D	YPD_30	YJM975YJM975	YJM975/Y12	232179
7	7	YJM975YJM975 rho YJM975 control d1	YPD	30	D	YPD_30	YJM975YJM975	YJM975	235874
8	7	YJM975YJM975 rho YJM975/Y12 G1 d123	YPD	30	D	YPD_30	YJM975YJM975	YJM975/Y12	247144
9	7	YJM975YJM975 rho YJM975/Y12 G1 d132	YPD	30	D	YPD_30	YJM975YJM975	YJM975/Y12	243553
10	7	YJM975YJM975 rho YJM975/Y12 G1 d92	YPD	30	D	YPD_30	YJM975YJM975	YJM975/Y12	240591
11	7	YJM975YJM975 rho YJM975/Y12 G1 d85	YPD	30	D	YPD_30	YJM975YJM975	YJM975/Y12	261033
12	7	YJM975YJM975 rho YJM975/Y12 G1 d118	YPD	30	D	YPD_30	YJM975YJM975	YJM975/Y12	248240
13	7	YJM975YJM975 rho YJM975/Y12 G1 d86	YPD	30	D	YPD_30	YJM975YJM975	YJM975/Y12	238882
14	7	YJM975YJM975 rho YJM975/Y12 G1 d119	YPD	30	D	YPD_30	YJM975YJM975	YJM975/Y12	241182
15	7	YJM975YJM975 rho YJM975/Y12 G1 d86	YPD	30	D	YPD_30	YJM975YJM975	YJM975/Y12	252440
16	7	YJM975YJM975 rho YJM975/Y12 G1 d85	YPD	30	D	YPD_30	YJM975YJM975	YJM975/Y12	246326
17	7	YJM975YJM975 rho YJM975/Y12 G1 d87	YPD	30	D	YPD_30	YJM975YJM975	YJM975/Y12	246797
18	7	YJM975YJM975 rho YJM975/Y12 G1 d87	YPD	30	D	YPD_30	YJM975YJM975	YJM975/Y12	242429
19	7	YJM975YJM975 rho YJM975/Y12 G1 d97	YPD	30	D	YPD_30	YJM975YJM975	YJM975/Y12	235111
20	7	YJM975YJM975 rho YJM975/Y12 G1 d130	YPD	30	D	YPD_30	YJM975YJM975	YJM975/Y12	243590
21	7	YJM975YJM975 rho YJM975/Y12 G1 d107	YPD	30	D	YPD_30	YJM975YJM975	YJM975/Y12	236319
22	7	YJM975YJM975 rho YJM975/Y12 G1 d116	YPD	30	D	YPD_30	YJM975YJM975	YJM975/Y12	280715
23	7	YJM975YJM975 rho YJM975/Y12 G1 d132	YPD	30	D	YPD_30	YJM975YJM975	YJM975/Y12	221784
24	7	YJM975YJM975 rho YJM975/Y12 G1 d97	YPD	30	D	YPD_30	YJM975YJM975	YJM975/Y12	230861
25	7	YJM975YJM975 rho YJM975/Y12 G1 d100	YPD	30	D	YPD_30	YJM975YJM975	YJM975/Y12	281666
26	7	YJM975YJM975 rho YJM975/Y12 G1 d95	YPD	30	D	YPD_30	YJM975YJM975	YJM975/Y12	226192
27	7	YJM975YJM975 rho YJM975/Y12 G1 d83	YPD	30	D	YPD_30	YJM975YJM975	YJM975/Y12	231109
28	7	YJM975YJM975 rho YJM975/Y12 G1 d129	YPD	30	D	YPD_30	YJM975YJM975	YJM975/Y12	228612
29	7	YJM975YJM975 rho YJM975/Y12 G1 d115	YPD	30	D	YPD_30	YJM975YJM975	YJM975/Y12	280585
30	7	by	YPD	30	D	YPD_30	by	by	213585
3	8	YJM975YJM975 rho YJM975 control d1	YPD	30	D	YPD_30	YJM975YJM975	YJM975	219775
4	8	YJM975YJM975 rho YJM975/Y12 G1 d124	YPD	30	D	YPD_30	YJM975YJM975	YJM975/Y12	218601
5	8	by	YPD	30	D	YPD_30	by	by	238772
6	8	YJM975YJM975 rho YJM975/Y12 G1 d109	YPD	30	D	YPD_30	YJM975YJM975	YJM975/Y12	240235
7	8	YJM975YJM975 rho YJM975/Y12 G1 d114	YPD	30	D	YPD_30	YJM975YJM975	YJM975/Y12	243592
8	8	YJM975YJM975 rho YJM975/Y12 G1 d102	YPD	30	D	YPD_30	YJM975YJM975	YJM975/Y12	241336
9	8	YJM975YJM975 rho YJM975/Y12 G1 d123	YPD	30	D	YPD_30	YJM975YJM975	YJM975/Y12	256473
10	8	YJM975YJM975 rho YJM975 control d2	YPD	30	D	YPD_30	YJM975YJM975	YJM975	263107
11	8	YJM975YJM975 rho YJM975/Y12 G1 d107	YPD	30	D	YPD_30	YJM975YJM975	YJM975/Y12	248073
12	8	YJM975YJM975 rho YJM975/Y12 G1 d127	YPD	30	D	YPD_30	YJM975YJM975	YJM975/Y12	251119
13	8	YJM975YJM975 rho YJM975/Y12 G1 d114	YPD	30	D	YPD_30	YJM975YJM975	YJM975/Y12	254959
14	8	YJM975YJM975 rho YJM975/Y12 G1 d106	YPD	30	D	YPD_30	YJM975YJM975	YJM975/Y12	241207
15	8	YJM975YJM975 rho YJM975/Y12 G1 d87	YPD	30	D	YPD_30	YJM975YJM975	YJM975/Y12	240455
16	8	YJM975YJM975 rho YJM975/Y12 G1 d92	YPD	30	D	YPD_30	YJM975YJM975	YJM975/Y12	244693
17	8	YJM975YJM975 rho YJM975/Y12 G1 d96	YPD	30	D	YPD_30	YJM975YJM975	YJM975/Y12	252246
18	8	YJM975YJM975 rho YJM975/Y12 G1 d107	YPD	30	D	YPD_30	YJM975YJM975	YJM975/Y12	250989
19	8	YJM975YJM975 rho YJM975/Y12 G1 d100	YPD	30	D	YPD_30	YJM975YJM975	YJM975/Y12	233870
20	8	YJM975YJM975 rho YJM975/Y12 G1 d90	YPD	30	D	YPD_30	YJM975YJM975	YJM975/Y12	229269
21	8	YJM975YJM975 rho YJM975/Y12 G1 d90	YPD	30	D	YPD_30	YJM975YJM975	YJM975/Y12	242648
22	8	YJM975YJM975 rho YJM975/Y12 G1 d115	YPD	30	D	YPD_30	YJM975YJM975	YJM975/Y12	239685
23	8	YJM975YJM975 rho YJM975/Y12 G1 d124	YPD	30	D	YPD_30	YJM975YJM975	YJM975/Y12	240727
24	8	YJM975YJM975 rho YJM975/Y12 G1 d109	YPD	30	D	YPD_30	YJM975YJM975	YJM975/Y12	234469
25	8	YJM975YJM975 rho YJM975/Y12 G1 d100	YPD	30	D	YPD_30	YJM975YJM975	YJM975/Y12	285406
26	8	YJM975YJM975 rho YJM975/Y12 G1 d116	YPD	30	D	YPD_30	YJM975YJM975	YJM975/Y12	292327
27	8	YJM975YJM975 rho YJM975/Y12 G1 d129	YPD	30	D	YPD_30	YJM975YJM975	YJM975/Y12	244589
28	8	YJM975YJM975 rho YJM975/Y12 G1 d102	YPD	30	D	YPD_30	YJM975YJM975	YJM975/Y12	297812
29	8	YJM975YJM975 rho YJM975/Y12 G1 d86	YPD	30	D	YPD_30	YJM975YJM975	YJM975/Y12	257542
3	9	YJM975YJM975 rho YJM975/Y12 G1 d101	YPD	30	D	YPD_30	YJM975YJM975	YJM975/Y12	212720
4	9	YJM975YJM975 rho YJM975/Y12 G1 d129	YPD	30	D	YPD_30	YJM975YJM975	YJM975/Y12	231808
5	9	YJM975YJM975 rho Y12 control d1	YPD	30	D	YPD_30	YJM975YJM975	Y12	233787
6	9	YJM975YJM975 rho YJM975/Y12 G1 d86	YPD	30	D	YPD_30	YJM975YJM975	YJM975/Y12	246832
7	9	YJM975YJM975 rho YJM975/Y12 G1 d102	YPD	30	D	YPD_30	YJM975YJM975	YJM975/Y12	245708
8	9	YJM975YJM975 rho YJM975/Y12 G1 d90	YPD	30	D	YPD_30	YJM975YJM975	YJM975/Y12	250222
9	9	YJM975YJM975 rho YJM975/Y12 G1 d89	YPD	30	D	YPD_30	YJM975YJM975	YJM975/Y12	255631
10	9	YJM975YJM975 rho YJM975/Y12 G1 d90	YPD	30	D	YPD_30	YJM975YJM975	YJM975/Y12	257538
11	9	YJM975YJM975 rho YJM975/Y12 G1 d118	YPD	30	D	YPD_30	YJM975YJM975	YJM975/Y12	247493
12	9	YJM975YJM975 rho YJM975/Y12 G1 d124	YPD	30	D	YPD_30	YJM975YJM975	YJM975/Y12	249474
13	9	YJM975YJM975 rho YJM975/Y12 G1 d100	YPD	30	D	YPD_30	YJM975YJM975	YJM975/Y12	256524
14	9	YJM975YJM975 rho YJM975/Y12 G1 d118	YPD	30	D	YPD_30	YJM975YJM975	YJM975/Y12	253579
15	9	YJM975YJM975 rho YJM975/Y12 G1 d126	YPD	30	D	YPD_30	YJM975YJM975	YJM975/Y12	243632
16	9	YJM975YJM975 rho YJM975/Y12 G1 d85	YPD	30	D	YPD_30	YJM975YJM975	YJM975/Y12	253866
17	9	by	YPD	30	D	YPD_30	by	by	223170
18	9	YJM975YJM975 rho YJM975/Y12 G1 d96	YPD	30	D	YPD_30	YJM975YJM975	YJM975/Y12	249988
19	9	YJM975YJM975 rho YJM975/Y12 G1 d123	YPD	30	D	YPD_30	YJM975YJM975	YJM975/Y12	250611
20	9	YJM975YJM975 rho YJM975/Y12 G1 d106	YPD	30	D	YPD_30	YJM975YJM975	YJM975/Y12	235346
21	9	YJM975YJM975 rho YJM975/Y12 G1 d96	YPD	30	D	YPD_30	YJM975YJM975	YJM975/Y12	236759
22	9	YJM975YJM975 rho YJM975/Y12 G1 d91	YPD	30	D	YPD_30	YJM975YJM975	YJM975/Y12	236219
23	9	YJM975YJM975 rho YJM975/Y12 G1 d108	YPD	30	D	YPD_30	YJM975YJM975	YJM975/Y12	224225
24	9	YJM975YJM975 rho YJM975/Y12 G1 d97	YPD	30	D	YPD_30	YJM975YJM975	YJM975/Y12	239857
25	9	YJM975YJM975 rho YJM975/Y12 G1 d98	YPD	30	D	YPD_30	YJM975YJM975	YJM975/Y12	246324
26	9	YJM975YJM975 rho YJM975/Y12 G1 d116	YPD	30	D	YPD_30	YJM975YJM975	YJM975/Y12	239578
27	9	YJM975YJM975 rho YJM975/Y12 G1 d107	YPD	30	D	YPD_30	YJM975YJM975	YJM975/Y12	233340
28	9	YJM975YJM975 rho YJM975/Y12 G1 d124	YPD	30	D	YPD_30	YJM975YJM975	YJM975/Y12	251763
29	9	YJM975YJM975 rho YJM975/Y12 G1 d108	YPD	30	D	YPD_30	YJM975YJM975	YJM975/Y12	281883
30	9	YJM975YJM975 rho YJM975/Y12 G1 d110	YPD	30	D	YPD_30	YJM975YJM975	YJM975/Y12	263337
3	10	YJM975YJM975 rho YJM975/Y12 G1 d116	YPD	30	D	YPD_30	YJM975YJM975	YJM975/Y12	215808
4	10	YJM975YJM975 rho YJM975/Y12 G1 d110	YPD	30	D	YPD_30	YJM975YJM975	YJM975/Y12	234361
5	10	YJM975YJM975 rho YJM975/Y12 G1 d94	YPD	30	D	YPD_30	YJM975YJM975	YJM975/Y12	235670
6	10	YJM975YJM975 rho YJM975/Y12 G1 d100	YPD	30	D	YPD_30	YJM975YJM975	YJM975/Y12	243405
7	10	YJM975YJM975 rho YJM975/Y12 G1 d92	YPD	30	D	YPD_30	YJM975YJM975	YJM975/Y12	255977
8	10	YJM975YJM975 rho YJM975/Y12 G1 d117	YPD	30	D	YPD_30	YJM975YJM975	YJM975/Y12	254478
9	10	YJM975YJM975 rho YJM975/Y12 G1 d91	YPD	30	D	YPD_30	YJM975YJM975	YJM975/Y12	254513
10	10	YJM975YJM975 rho YJM975/Y12 G1 d118	YPD	30	D	YPD_30	YJM975YJM975	YJM975/Y12	256600
11	10	YJM975YJM975 rho YJM975/Y12 G1 d105	YPD	30	D	YPD_30	YJM975YJM975	YJM975/Y12	240598
12	10	YJM975YJM975 rho YJM975/Y12 G1 d127	YPD	30	D	YPD_30	YJM975YJM975	YJM975/Y12	254510
13	10	YJM975YJM975 rho YJM975/Y12 G1 d109	YPD	30	D	YPD_30	YJM975YJM975	YJM975/Y12	242962
14	10	YJM975YJM975 rho YJM975/Y12 G1 d129	YPD	30	D	YPD_30	YJM975YJM975	YJM975/Y12	264727
15	10	by	YPD	30	D	YPD_30	by	by	230223
16	10	YJM975YJM975 rho YJM975/Y12 G1 d91	YPD	30	D	YPD_30	YJM975YJM975	YJM975/Y12	258218
17	10	YJM975YJM975 rho YJM975/Y12 G1 d126	YPD	30	D	YPD_30	YJM975YJM975	YJM975/Y12	252476
18	10	YJM975YJM975 rho YJM975/Y12 G1 d96	YPD	30	D	YPD_30	YJM975YJM975	YJM975/Y12	237786
19	10	by	YPD	30	D	YPD_30	by	by	225463
20	10	YJM975YJM975 rho YJM975/Y12 G1 d103	YPD	30	D	YPD_30	YJM975YJM975	YJM975/Y12	241895
21	10	YJM975YJM975 rho YJM975/Y12 G1 d85	YPD	30	D	YPD_30	YJM975YJM975	YJM975/Y12	240690
22	10	YJM975YJM975 rho YJM975/Y12 G1 d85	YPD	30	D	YPD_30	YJM975YJM975	YJM975/Y12	245344
23	10	YJM975YJM975 rho YJM975/Y12 G1 d115	YPD	30	D	YPD_30	YJM975YJM975	YJM975/Y12	244536
24	10	YJM975YJM975 rho YJM975/Y12 G1 d86	YPD	30	D	YPD_30	YJM975YJM975	YJM975/Y12	251464
25	10	YJM975YJM975 rho YJM975/Y12 G1 d126	YPD	30	D	YPD_30	YJM975YJM975	YJM975/Y12	240535
26	10	YJM975YJM975 rho YJM975/Y12 G1 d97	YPD	30	D	YPD_30	YJM975YJM975	YJM975/Y12	245338
27	10	YJM975YJM975 rho YJM975/Y12 G1 d113	YPD	30	D	YPD_30	YJM975YJM975	YJM975/Y12	250766
28	10	by	YPD	30	D	YPD_30	by	by	209808
29	10	YJM975YJM975 rho YJM975/Y12 G1 d96	YPD	30	D	YPD_30	YJM975YJM975	YJM975/Y12	285264
30	10	YJM975YJM975 rho YJM975/Y12 G1 d130	YPD	30	D	YPD_30	YJM975YJM975	YJM975/Y12	274098
3	11	YJM975YJM975 rho YJM975/Y12 G1 d88	YPD	30	D	YPD_30	YJM975YJM975	YJM975/Y12	215676
4	11	by	YPD	30	D	YPD_30	by	by	253711
5	11	YJM975YJM975 rho YJM975/Y12 G1 d88	YPD	30	D	YPD_30	YJM975YJM975	YJM975/Y12	234316
6	11	YJM975YJM975 rho YJM975/Y12 G1 d114	YPD	30	D	YPD_30	YJM975YJM975	YJM975/Y12	248252
7	11	YJM975YJM975 rho YJM975/Y12 G1 d88	YPD	30	D	YPD_30	YJM975YJM975	YJM975/Y12	257893
8	11	YJM975YJM975 rho YJM975/Y12 G1 d107	YPD	30	D	YPD_30	YJM975YJM975	YJM975/Y12	261106
9	11	by	YPD	30	D	YPD_30	by	by	238028
10	11	YJM975YJM975 rho YJM975/Y12 G1 d109	YPD	30	D	YPD_30	YJM975YJM975	YJM975/Y12	261541
11	11	YJM975YJM975 rho YJM975/Y12 G1 d119	YPD	30	D	YPD_30	YJM975YJM975	YJM975/Y12	260879
12	11	YJM975YJM975 rho YJM975/Y12 G1 d100	YPD	30	D	YPD_30	YJM975YJM975	YJM975/Y12	257937
13	11	by	YPD	30	D	YPD_30	by	by	238589
14	11	YJM975YJM975 rho YJM975/Y12 G1 d107	YPD	30	D	YPD_30	YJM975YJM975	YJM975/Y12	263752
15	11	YJM975YJM975 rho YJM975/Y12 G1 d105	YPD	30	D	YPD_30	YJM975YJM975	YJM975/Y12	252934
17	11	by	YPD	30	D	YPD_30	by	by	221146
18	11	YJM975YJM975 rho YJM975 control d2	YPD	30	D	YPD_30	YJM975YJM975	YJM975	256771
19	11	YJM975YJM975 rho YJM975/Y12 G1 d127	YPD	30	D	YPD_30	YJM975YJM975	YJM975/Y12	232865
20	11	YJM975YJM975 rho YJM975/Y12 G1 d112	YPD	30	D	YPD_30	YJM975YJM975	YJM975/Y12	240694
22	11	by	YPD	30	D	YPD_30	by	by	190090
23	11	YJM975YJM975 rho YJM975/Y12 G1 d107	YPD	30	D	YPD_30	YJM975YJM975	YJM975/Y12	236259
24	11	YJM975YJM975 rho YJM975/Y12 G1 d130	YPD	30	D	YPD_30	YJM975YJM975	YJM975/Y12	250607
25	11	YJM975YJM975 rho YJM975/Y12 G1 d117	YPD	30	D	YPD_30	YJM975YJM975	YJM975/Y12	247630
27	11	YJM975YJM975 rho YJM975/Y12 G1 d103	YPD	30	D	YPD_30	YJM975YJM975	YJM975/Y12	249666
28	11	YJM975YJM975 rho YJM975 control d1	YPD	30	D	YPD_30	YJM975YJM975	YJM975	266009
29	11	YJM975YJM975 rho YJM975/Y12 G1 d91	YPD	30	D	YPD_30	YJM975YJM975	YJM975/Y12	282224
30	11	YJM975YJM975 rho YJM975/Y12 G1 d107	YPD	30	D	YPD_30	YJM975YJM975	YJM975/Y12	279233
3	12	YJM975YJM975 rho YJM975/Y12 G1 d108	YPD	30	D	YPD_30	YJM975YJM975	YJM975/Y12	209071
4	12	YJM975YJM975 rho YJM975/Y12 G1 d113	YPD	30	D	YPD_30	YJM975YJM975	YJM975/Y12	233682
5	12	YJM975YJM975 rho YJM975/Y12 G1 d115	YPD	30	D	YPD_30	YJM975YJM975	YJM975/Y12	247459
6	12	YJM975YJM975 rho YJM975/Y12 G1 d102	YPD	30	D	YPD_30	YJM975YJM975	YJM975/Y12	241175
7	12	YJM975YJM975 rho YJM975/Y12 G1 d85	YPD	30	D	YPD_30	YJM975YJM975	YJM975/Y12	251424
8	12	YJM975YJM975 rho Y12 control d1	YPD	30	D	YPD_30	YJM975YJM975	Y12	253719
9	12	YJM975YJM975 rho YJM975/Y12 G1 d97	YPD	30	D	YPD_30	YJM975YJM975	YJM975/Y12	258633
11	12	YJM975YJM975 rho YJM975/Y12 G1 d91	YPD	30	D	YPD_30	YJM975YJM975	YJM975/Y12	254774
12	12	YJM975YJM975 rho YJM975 control d1	YPD	30	D	YPD_30	YJM975YJM975	YJM975	254775
13	12	YJM975YJM975 rho YJM975 control d1	YPD	30	D	YPD_30	YJM975YJM975	YJM975	284283
14	12	by	YPD	30	D	YPD_30	by	by	243423
15	12	YJM975YJM975 rho YJM975/Y12 G1 d87	YPD	30	D	YPD_30	YJM975YJM975	YJM975/Y12	268205
17	12	YJM975YJM975 rho YJM975/Y12 G1 d130	YPD	30	D	YPD_30	YJM975YJM975	YJM975/Y12	252444
18	12	YJM975YJM975 rho YJM975/Y12 G1 d100	YPD	30	D	YPD_30	YJM975YJM975	YJM975/Y12	243417
19	12	YJM975YJM975 rho Y12 control d2	YPD	30	D	YPD_30	YJM975YJM975	Y12	239976
21	12	YJM975YJM975 rho YJM975/Y12 G1 d85	YPD	30	D	YPD_30	YJM975YJM975	YJM975/Y12	245223
22	12	YJM975YJM975 rho YJM975/Y12 G1 d91	YPD	30	D	YPD_30	YJM975YJM975	YJM975/Y12	251437
23	12	YJM975YJM975 rho YJM975/Y12 G1 d83	YPD	30	D	YPD_30	YJM975YJM975	YJM975/Y12	239318
24	12	YJM975YJM975 rho YJM975/Y12 G1 d105	YPD	30	D	YPD_30	YJM975YJM975	YJM975/Y12	239285
25	12	YJM975YJM975 rho Y12 control d2	YPD	30	D	YPD_30	YJM975YJM975	Y12	255389
27	12	YJM975YJM975 rho YJM975/Y12 G1 d113	YPD	30	D	YPD_30	YJM975YJM975	YJM975/Y12	253457
28	12	YJM975YJM975 rho YJM975/Y12 G1 d94	YPD	30	D	YPD_30	YJM975YJM975	YJM975/Y12	255044
29	12	YJM975YJM975 rho YJM975 control d2	YPD	30	D	YPD_30	YJM975YJM975	YJM975	281085
30	12	YJM975YJM975 rho YJM975/Y12 G1 d102	YPD	30	D	YPD_30	YJM975YJM975	YJM975/Y12	243509
3	13	YJM975YJM975 rho YJM975/Y12 G1 d117	YPD	30	D	YPD_30	YJM975YJM975	YJM975/Y12	212739
4	13	YJM975YJM975 rho YJM975/Y12 G1 d112	YPD	30	D	YPD_30	YJM975YJM975	YJM975/Y12	222267
5	13	YJM975YJM975 rho YJM975/Y12 G1 d101	YPD	30	D	YPD_30	YJM975YJM975	YJM975/Y12	227141
6	13	YJM975YJM975 rho YJM975/Y12 G1 d96	YPD	30	D	YPD_30	YJM975YJM975	YJM975/Y12	236926
7	13	YJM975YJM975 rho YJM975/Y12 G1 d108	YPD	30	D	YPD_30	YJM975YJM975	YJM975/Y12	251758
8	13	YJM975YJM975 rho YJM975/Y12 G1 d101	YPD	30	D	YPD_30	YJM975YJM975	YJM975/Y12	253210
9	13	YJM975YJM975 rho YJM975/Y12 G1 d116	YPD	30	D	YPD_30	YJM975YJM975	YJM975/Y12	252013
10	13	YJM975YJM975 rho YJM975/Y12 G1 d83	YPD	30	D	YPD_30	YJM975YJM975	YJM975/Y12	253437
11	13	YJM975YJM975 rho YJM975/Y12 G1 d126	YPD	30	D	YPD_30	YJM975YJM975	YJM975/Y12	242520
12	13	YJM975YJM975 rho YJM975/Y12 G1 d88	YPD	30	D	YPD_30	YJM975YJM975	YJM975/Y12	259017
13	13	by	YPD	30	D	YPD_30	by	by	244938
14	13	by	YPD	30	D	YPD_30	by	by	245992
15	13	YJM975YJM975 rho YJM975/Y12 G1 d118	YPD	30	D	YPD_30	YJM975YJM975	YJM975/Y12	255027
16	13	YJM975YJM975 rho YJM975/Y12 G1 d108	YPD	30	D	YPD_30	YJM975YJM975	YJM975/Y12	271957
17	13	YJM975YJM975 rho YJM975/Y12 G1 d103	YPD	30	D	YPD_30	YJM975YJM975	YJM975/Y12	256038
18	13	YJM975YJM975 rho YJM975/Y12 G1 d85	YPD	30	D	YPD_30	YJM975YJM975	YJM975/Y12	252236
19	13	YJM975YJM975 rho YJM975/Y12 G1 d109	YPD	30	D	YPD_30	YJM975YJM975	YJM975/Y12	238111
20	13	YJM975YJM975 rho YJM975/Y12 G1 d88	YPD	30	D	YPD_30	YJM975YJM975	YJM975/Y12	243638
21	13	YJM975YJM975 rho YJM975/Y12 G1 d132	YPD	30	D	YPD_30	YJM975YJM975	YJM975/Y12	232040
22	13	YJM975YJM975 rho YJM975/Y12 G1 d115	YPD	30	D	YPD_30	YJM975YJM975	YJM975/Y12	252261
23	13	YJM975YJM975 rho YJM975/Y12 G1 d124	YPD	30	D	YPD_30	YJM975YJM975	YJM975/Y12	234509
24	13	YJM975YJM975 rho YJM975/Y12 G1 d104	YPD	30	D	YPD_30	YJM975YJM975	YJM975/Y12	230944
25	13	YJM975YJM975 rho YJM975/Y12 G1 d92	YPD	30	D	YPD_30	YJM975YJM975	YJM975/Y12	259660
26	13	YJM975YJM975 rho YJM975/Y12 G1 d114	YPD	30	D	YPD_30	YJM975YJM975	YJM975/Y12	244897
27	13	YJM975YJM975 rho YJM975/Y12 G1 d95	YPD	30	D	YPD_30	YJM975YJM975	YJM975/Y12	246786
28	13	YJM975YJM975 rho Y12 control d1	YPD	30	D	YPD_30	YJM975YJM975	Y12	240912
29	13	YJM975YJM975 rho YJM975/Y12 G1 d98	YPD	30	D	YPD_30	YJM975YJM975	YJM975/Y12	223423
30	13	YJM975YJM975 rho YJM975/Y12 G1 d130	YPD	30	D	YPD_30	YJM975YJM975	YJM975/Y12	244699
3	14	YJM975YJM975 rho YJM975/Y12 G1 d86	YPD	30	D	YPD_30	YJM975YJM975	YJM975/Y12	207747
4	14	YJM975YJM975 rho Y12 control d1	YPD	30	D	YPD_30	YJM975YJM975	Y12	222370
5	14	YJM975YJM975 rho YJM975/Y12 G1 d98	YPD	30	D	YPD_30	YJM975YJM975	YJM975/Y12	215479
6	14	YJM975YJM975 rho YJM975/Y12 G1 d88	YPD	30	D	YPD_30	YJM975YJM975	YJM975/Y12	237617
7	14	YJM975YJM975 rho YJM975/Y12 G1 d107	YPD	30	D	YPD_30	YJM975YJM975	YJM975/Y12	256665
8	14	YJM975YJM975 rho YJM975/Y12 G1 d118	YPD	30	D	YPD_30	YJM975YJM975	YJM975/Y12	249579
9	14	YJM975YJM975 rho YJM975/Y12 G1 d110	YPD	30	D	YPD_30	YJM975YJM975	YJM975/Y12	251612
10	14	YJM975YJM975 rho YJM975/Y12 G1 d127	YPD	30	D	YPD_30	YJM975YJM975	YJM975/Y12	243126
11	14	YJM975YJM975 rho YJM975/Y12 G1 d101	YPD	30	D	YPD_30	YJM975YJM975	YJM975/Y12	239857
12	14	YJM975YJM975 rho YJM975/Y12 G1 d130	YPD	30	D	YPD_30	YJM975YJM975	YJM975/Y12	253383
13	14	YJM975YJM975 rho YJM975/Y12 G1 d109	YPD	30	D	YPD_30	YJM975YJM975	YJM975/Y12	266712
14	14	YJM975YJM975 rho YJM975/Y12 G1 d87	YPD	30	D	YPD_30	YJM975YJM975	YJM975/Y12	262092
15	14	YJM975YJM975 rho YJM975/Y12 G1 d86	YPD	30	D	YPD_30	YJM975YJM975	YJM975/Y12	232901
16	14	YJM975YJM975 rho YJM975/Y12 G1 d100	YPD	30	D	YPD_30	YJM975YJM975	YJM975/Y12	251446
17	14	by	YPD	30	D	YPD_30	by	by	229418
18	14	YJM975YJM975 rho YJM975/Y12 G1 d132	YPD	30	D	YPD_30	YJM975YJM975	YJM975/Y12	261333
19	14	YJM975YJM975 rho YJM975/Y12 G1 d116	YPD	30	D	YPD_30	YJM975YJM975	YJM975/Y12	236607
20	14	YJM975YJM975 rho YJM975/Y12 G1 d104	YPD	30	D	YPD_30	YJM975YJM975	YJM975/Y12	226013
21	14	YJM975YJM975 rho YJM975 control d2	YPD	30	D	YPD_30	YJM975YJM975	YJM975	236589
22	14	YJM975YJM975 rho Y12 control d2	YPD	30	D	YPD_30	YJM975YJM975	Y12	237141
23	14	YJM975YJM975 rho YJM975/Y12 G1 d124	YPD	30	D	YPD_30	YJM975YJM975	YJM975/Y12	233905
24	14	YJM975YJM975 rho YJM975/Y12 G1 d92	YPD	30	D	YPD_30	YJM975YJM975	YJM975/Y12	229068
26	14	YJM975YJM975 rho YJM975/Y12 G1 d115	YPD	30	D	YPD_30	YJM975YJM975	YJM975/Y12	253340
27	14	YJM975YJM975 rho YJM975/Y12 G1 d132	YPD	30	D	YPD_30	YJM975YJM975	YJM975/Y12	246107
28	14	YJM975YJM975 rho YJM975/Y12 G1 d109	YPD	30	D	YPD_30	YJM975YJM975	YJM975/Y12	257893
29	14	YJM975YJM975 rho YJM975/Y12 G1 d122	YPD	30	D	YPD_30	YJM975YJM975	YJM975/Y12	237323
30	14	by	YPD	30	D	YPD_30	by	by	251019
4	15	by	YPD	30	D	YPD_30	by	by	233407
5	15	YJM975YJM975 rho YJM975/Y12 G1 d90	YPD	30	D	YPD_30	YJM975YJM975	YJM975/Y12	233990
6	15	YJM975YJM975 rho YJM975/Y12 G1 d108	YPD	30	D	YPD_30	YJM975YJM975	YJM975/Y12	244950
7	15	YJM975YJM975 rho YJM975/Y12 G1 d110	YPD	30	D	YPD_30	YJM975YJM975	YJM975/Y12	254668
8	15	YJM975YJM975 rho YJM975/Y12 G1 d118	YPD	30	D	YPD_30	YJM975YJM975	YJM975/Y12	256036
9	15	YJM975YJM975 rho YJM975/Y12 G1 d118	YPD	30	D	YPD_30	YJM975YJM975	YJM975/Y12	265032
11	15	YJM975YJM975 rho YJM975/Y12 G1 d110	YPD	30	D	YPD_30	YJM975YJM975	YJM975/Y12	270267
12	15	YJM975YJM975 rho YJM975/Y12 G1 d88	YPD	30	D	YPD_30	YJM975YJM975	YJM975/Y12	253906
13	15	YJM975YJM975 rho YJM975/Y12 G1 d96	YPD	30	D	YPD_30	YJM975YJM975	YJM975/Y12	244566
14	15	YJM975YJM975 rho YJM975/Y12 G1 d119	YPD	30	D	YPD_30	YJM975YJM975	YJM975/Y12	247463
15	15	YJM975YJM975 rho YJM975/Y12 G1 d116	YPD	30	D	YPD_30	YJM975YJM975	YJM975/Y12	262120
16	15	YJM975YJM975 rho YJM975/Y12 G1 d86	YPD	30	D	YPD_30	YJM975YJM975	YJM975/Y12	238843
17	15	YJM975YJM975 rho YJM975/Y12 G1 d104	YPD	30	D	YPD_30	YJM975YJM975	YJM975/Y12	253717
18	15	by	YPD	30	D	YPD_30	by	by	238326
19	15	YJM975YJM975 rho YJM975/Y12 G1 d132	YPD	30	D	YPD_30	YJM975YJM975	YJM975/Y12	248178
20	15	YJM975YJM975 rho YJM975/Y12 G1 d87	YPD	30	D	YPD_30	YJM975YJM975	YJM975/Y12	238330
21	15	YJM975YJM975 rho YJM975/Y12 G1 d86	YPD	30	D	YPD_30	YJM975YJM975	YJM975/Y12	252018
22	15	YJM975YJM975 rho YJM975/Y12 G1 d98	YPD	30	D	YPD_30	YJM975YJM975	YJM975/Y12	249260
23	15	YJM975YJM975 rho YJM975/Y12 G1 d110	YPD	30	D	YPD_30	YJM975YJM975	YJM975/Y12	231513
24	15	YJM975YJM975 rho YJM975/Y12 G1 d94	YPD	30	D	YPD_30	YJM975YJM975	YJM975/Y12	243471
25	15	YJM975YJM975 rho YJM975/Y12 G1 d109	YPD	30	D	YPD_30	YJM975YJM975	YJM975/Y12	246586
26	15	YJM975YJM975 rho YJM975/Y12 G1 d106	YPD	30	D	YPD_30	YJM975YJM975	YJM975/Y12	246838
27	15	YJM975YJM975 rho YJM975/Y12 G1 d118	YPD	30	D	YPD_30	YJM975YJM975	YJM975/Y12	241757
28	15	YJM975YJM975 rho YJM975/Y12 G1 d95	YPD	30	D	YPD_30	YJM975YJM975	YJM975/Y12	234289
29	15	YJM975YJM975 rho YJM975 control d2	YPD	30	D	YPD_30	YJM975YJM975	YJM975	256737
30	15	YJM975YJM975 rho YJM975/Y12 G1 d115	YPD	30	D	YPD_30	YJM975YJM975	YJM975/Y12	240852
3	16	YJM975YJM975 rho Y12 control d2	YPD	30	D	YPD_30	YJM975YJM975	Y12	214241
4	16	YJM975YJM975 rho YJM975 control d1	YPD	30	D	YPD_30	YJM975YJM975	YJM975	240711
5	16	YJM975YJM975 rho YJM975/Y12 G1 d129	YPD	30	D	YPD_30	YJM975YJM975	YJM975/Y12	238834
6	16	YJM975YJM975 rho YJM975/Y12 G1 d86	YPD	30	D	YPD_30	YJM975YJM975	YJM975/Y12	242167
7	16	YJM975YJM975 rho YJM975/Y12 G1 d86	YPD	30	D	YPD_30	YJM975YJM975	YJM975/Y12	256824
8	16	YJM975YJM975 rho YJM975/Y12 G1 d130	YPD	30	D	YPD_30	YJM975YJM975	YJM975/Y12	251632
9	16	YJM975YJM975 rho YJM975/Y12 G1 d95	YPD	30	D	YPD_30	YJM975YJM975	YJM975/Y12	261746
10	16	YJM975YJM975 rho YJM975/Y12 G1 d98	YPD	30	D	YPD_30	YJM975YJM975	YJM975/Y12	269825
11	16	by	YPD	30	D	YPD_30	by	by	249644
12	16	YJM975YJM975 rho YJM975/Y12 G1 d123	YPD	30	D	YPD_30	YJM975YJM975	YJM975/Y12	260169
13	16	YJM975YJM975 rho YJM975/Y12 G1 d92	YPD	30	D	YPD_30	YJM975YJM975	YJM975/Y12	243230
14	16	YJM975YJM975 rho YJM975/Y12 G1 d95	YPD	30	D	YPD_30	YJM975YJM975	YJM975/Y12	269676
15	16	by	YPD	30	D	YPD_30	by	by	231979
16	16	YJM975YJM975 rho YJM975/Y12 G1 d92	YPD	30	D	YPD_30	YJM975YJM975	YJM975/Y12	243161
17	16	YJM975YJM975 rho YJM975/Y12 G1 d119	YPD	30	D	YPD_30	YJM975YJM975	YJM975/Y12	235655
18	16	YJM975YJM975 rho YJM975/Y12 G1 d88	YPD	30	D	YPD_30	YJM975YJM975	YJM975/Y12	250204
20	16	YJM975YJM975 rho YJM975 control d1	YPD	30	D	YPD_30	YJM975YJM975	YJM975	248498
22	16	YJM975YJM975 rho YJM975/Y12 G1 d105	YPD	30	D	YPD_30	YJM975YJM975	YJM975/Y12	253085
23	16	YJM975YJM975 rho YJM975/Y12 G1 d104	YPD	30	D	YPD_30	YJM975YJM975	YJM975/Y12	243138
24	16	YJM975YJM975 rho YJM975/Y12 G1 d83	YPD	30	D	YPD_30	YJM975YJM975	YJM975/Y12	245269
25	16	YJM975YJM975 rho YJM975/Y12 G1 d90	YPD	30	D	YPD_30	YJM975YJM975	YJM975/Y12	231902
26	16	YJM975YJM975 rho YJM975/Y12 G1 d88	YPD	30	D	YPD_30	YJM975YJM975	YJM975/Y12	240675
27	16	YJM975YJM975 rho YJM975/Y12 G1 d128	YPD	30	D	YPD_30	YJM975YJM975	YJM975/Y12	241448
28	16	YJM975YJM975 rho YJM975/Y12 G1 d90	YPD	30	D	YPD_30	YJM975YJM975	YJM975/Y12	250508
29	16	YJM975YJM975 rho YJM975/Y12 G1 d117	YPD	30	D	YPD_30	YJM975YJM975	YJM975/Y12	237708
30	16	YJM975YJM975 rho YJM975/Y12 G1 d103	YPD	30	D	YPD_30	YJM975YJM975	YJM975/Y12	242632
3	17	YJM975YJM975 rho YJM975/Y12 G1 d104	YPD	30	D	YPD_30	YJM975YJM975	YJM975/Y12	207148
4	17	YJM975YJM975 rho YJM975/Y12 G1 d83	YPD	30	D	YPD_30	YJM975YJM975	YJM975/Y12	203956
5	17	YJM975YJM975 rho YJM975/Y12 G1 d123	YPD	30	D	YPD_30	YJM975YJM975	YJM975/Y12	234053
6	17	YJM975YJM975 rho YJM975/Y12 G1 d90	YPD	30	D	YPD_30	YJM975YJM975	YJM975/Y12	240131
7	17	YJM975YJM975 rho YJM975/Y12 G1 d90	YPD	30	D	YPD_30	YJM975YJM975	YJM975/Y12	256608
8	17	YJM975YJM975 rho YJM975/Y12 G1 d100	YPD	30	D	YPD_30	YJM975YJM975	YJM975/Y12	261978
9	17	YJM975YJM975 rho YJM975/Y12 G1 d94	YPD	30	D	YPD_30	YJM975YJM975	YJM975/Y12	264833
10	17	YJM975YJM975 rho YJM975/Y12 G1 d103	YPD	30	D	YPD_30	YJM975YJM975	YJM975/Y12	263632
11	17	YJM975YJM975 rho YJM975/Y12 G1 d116	YPD	30	D	YPD_30	YJM975YJM975	YJM975/Y12	257342
12	17	YJM975YJM975 rho YJM975/Y12 G1 d129	YPD	30	D	YPD_30	YJM975YJM975	YJM975/Y12	250082
13	17	YJM975YJM975 rho YJM975/Y12 G1 d87	YPD	30	D	YPD_30	YJM975YJM975	YJM975/Y12	271853
14	17	by	YPD	30	D	YPD_30	by	by	243426
15	17	YJM975YJM975 rho YJM975/Y12 G1 d109	YPD	30	D	YPD_30	YJM975YJM975	YJM975/Y12	255295
16	17	YJM975YJM975 rho YJM975/Y12 G1 d94	YPD	30	D	YPD_30	YJM975YJM975	YJM975/Y12	241635
17	17	YJM975YJM975 rho YJM975/Y12 G1 d104	YPD	30	D	YPD_30	YJM975YJM975	YJM975/Y12	243248
18	17	YJM975YJM975 rho Y12 control d2	YPD	30	D	YPD_30	YJM975YJM975	Y12	244884
19	17	YJM975YJM975 rho YJM975 control d2	YPD	30	D	YPD_30	YJM975YJM975	YJM975	244475
20	17	YJM975YJM975 rho YJM975/Y12 G1 d87	YPD	30	D	YPD_30	YJM975YJM975	YJM975/Y12	239963
21	17	YJM975YJM975 rho YJM975/Y12 G1 d129	YPD	30	D	YPD_30	YJM975YJM975	YJM975/Y12	250675
22	17	YJM975YJM975 rho YJM975/Y12 G1 d87	YPD	30	D	YPD_30	YJM975YJM975	YJM975/Y12	243021
23	17	YJM975YJM975 rho YJM975/Y12 G1 d95	YPD	30	D	YPD_30	YJM975YJM975	YJM975/Y12	234682
24	17	YJM975YJM975 rho Y12 control d1	YPD	30	D	YPD_30	YJM975YJM975	Y12	253350
25	17	YJM975YJM975 rho YJM975/Y12 G1 d110	YPD	30	D	YPD_30	YJM975YJM975	YJM975/Y12	231661
26	17	YJM975YJM975 rho YJM975/Y12 G1 d98	YPD	30	D	YPD_30	YJM975YJM975	YJM975/Y12	254449
27	17	YJM975YJM975 rho YJM975 control d2	YPD	30	D	YPD_30	YJM975YJM975	YJM975	254445
28	17	YJM975YJM975 rho YJM975/Y12 G1 d109	YPD	30	D	YPD_30	YJM975YJM975	YJM975/Y12	244372
29	17	YJM975YJM975 rho YJM975/Y12 G1 d95	YPD	30	D	YPD_30	YJM975YJM975	YJM975/Y12	243507
30	17	YJM975YJM975 rho YJM975/Y12 G1 d107	YPD	30	D	YPD_30	YJM975YJM975	YJM975/Y12	234673
3	18	YJM975YJM975 rho YJM975/Y12 G1 d115	YPD	30	D	YPD_30	YJM975YJM975	YJM975/Y12	210994
4	18	YJM975YJM975 rho YJM975/Y12 G1 d85	YPD	30	D	YPD_30	YJM975YJM975	YJM975/Y12	208235
5	18	YJM975YJM975 rho YJM975/Y12 G1 d113	YPD	30	D	YPD_30	YJM975YJM975	YJM975/Y12	238906
6	18	YJM975YJM975 rho YJM975/Y12 G1 d92	YPD	30	D	YPD_30	YJM975YJM975	YJM975/Y12	242450
7	18	YJM975YJM975 rho YJM975/Y12 G1 d87	YPD	30	D	YPD_30	YJM975YJM975	YJM975/Y12	251700
8	18	YJM975YJM975 rho YJM975/Y12 G1 d122	YPD	30	D	YPD_30	YJM975YJM975	YJM975/Y12	250088
9	18	YJM975YJM975 rho YJM975/Y12 G1 d128	YPD	30	D	YPD_30	YJM975YJM975	YJM975/Y12	256398
10	18	YJM975YJM975 rho YJM975/Y12 G1 d132	YPD	30	D	YPD_30	YJM975YJM975	YJM975/Y12	260206
11	18	YJM975YJM975 rho YJM975/Y12 G1 d94	YPD	30	D	YPD_30	YJM975YJM975	YJM975/Y12	248903
12	18	YJM975YJM975 rho YJM975 control d2	YPD	30	D	YPD_30	YJM975YJM975	YJM975	265356
13	18	by	YPD	30	D	YPD_30	by	by	254333
14	18	by	YPD	30	D	YPD_30	by	by	256643
15	18	YJM975YJM975 rho YJM975/Y12 G1 d126	YPD	30	D	YPD_30	YJM975YJM975	YJM975/Y12	247632
16	18	YJM975YJM975 rho YJM975/Y12 G1 d128	YPD	30	D	YPD_30	YJM975YJM975	YJM975/Y12	246650
18	18	YJM975YJM975 rho YJM975/Y12 G1 d105	YPD	30	D	YPD_30	YJM975YJM975	YJM975/Y12	233799
19	18	YJM975YJM975 rho YJM975/Y12 G1 d132	YPD	30	D	YPD_30	YJM975YJM975	YJM975/Y12	261575
20	18	YJM975YJM975 rho YJM975/Y12 G1 d106	YPD	30	D	YPD_30	YJM975YJM975	YJM975/Y12	233867
21	18	YJM975YJM975 rho YJM975/Y12 G1 d112	YPD	30	D	YPD_30	YJM975YJM975	YJM975/Y12	227992
22	18	YJM975YJM975 rho YJM975/Y12 G1 d128	YPD	30	D	YPD_30	YJM975YJM975	YJM975/Y12	221680
23	18	YJM975YJM975 rho YJM975/Y12 G1 d85	YPD	30	D	YPD_30	YJM975YJM975	YJM975/Y12	235242
24	18	YJM975YJM975 rho YJM975/Y12 G1 d101	YPD	30	D	YPD_30	YJM975YJM975	YJM975/Y12	241557
25	18	YJM975YJM975 rho YJM975/Y12 G1 d115	YPD	30	D	YPD_30	YJM975YJM975	YJM975/Y12	247661
26	18	by	YPD	30	D	YPD_30	by	by	233535
27	18	YJM975YJM975 rho YJM975/Y12 G1 d96	YPD	30	D	YPD_30	YJM975YJM975	YJM975/Y12	244021
28	18	YJM975YJM975 rho YJM975/Y12 G1 d100	YPD	30	D	YPD_30	YJM975YJM975	YJM975/Y12	243721
29	18	YJM975YJM975 rho YJM975/Y12 G1 d106	YPD	30	D	YPD_30	YJM975YJM975	YJM975/Y12	242810
30	18	YJM975YJM975 rho Y12 control d2	YPD	30	D	YPD_30	YJM975YJM975	Y12	250699
3	19	YJM975YJM975 rho Y12 control d2	YPD	30	D	YPD_30	YJM975YJM975	Y12	214937
4	19	YJM975YJM975 rho YJM975 control d2	YPD	30	D	YPD_30	YJM975YJM975	YJM975	233846
5	19	YJM975YJM975 rho YJM975/Y12 G1 d116	YPD	30	D	YPD_30	YJM975YJM975	YJM975/Y12	221541
6	19	YJM975YJM975 rho Y12 control d2	YPD	30	D	YPD_30	YJM975YJM975	Y12	253630
7	19	YJM975YJM975 rho YJM975 control d2	YPD	30	D	YPD_30	YJM975YJM975	YJM975	257271
8	19	YJM975YJM975 rho YJM975 control d1	YPD	30	D	YPD_30	YJM975YJM975	YJM975	267570
9	19	YJM975YJM975 rho YJM975/Y12 G1 d105	YPD	30	D	YPD_30	YJM975YJM975	YJM975/Y12	258416
10	19	YJM975YJM975 rho YJM975/Y12 G1 d127	YPD	30	D	YPD_30	YJM975YJM975	YJM975/Y12	260705
11	19	by	YPD	30	D	YPD_30	by	by	263243
12	19	YJM975YJM975 rho YJM975/Y12 G1 d100	YPD	30	D	YPD_30	YJM975YJM975	YJM975/Y12	264631
13	19	YJM975YJM975 rho YJM975/Y12 G1 d96	YPD	30	D	YPD_30	YJM975YJM975	YJM975/Y12	251974
14	19	YJM975YJM975 rho YJM975/Y12 G1 d96	YPD	30	D	YPD_30	YJM975YJM975	YJM975/Y12	250389
15	19	YJM975YJM975 rho YJM975/Y12 G1 d124	YPD	30	D	YPD_30	YJM975YJM975	YJM975/Y12	240652
16	19	YJM975YJM975 rho YJM975/Y12 G1 d117	YPD	30	D	YPD_30	YJM975YJM975	YJM975/Y12	242187
17	19	YJM975YJM975 rho YJM975/Y12 G1 d130	YPD	30	D	YPD_30	YJM975YJM975	YJM975/Y12	238697
18	19	YJM975YJM975 rho YJM975/Y12 G1 d123	YPD	30	D	YPD_30	YJM975YJM975	YJM975/Y12	243164
21	19	YJM975YJM975 rho YJM975/Y12 G1 d85	YPD	30	D	YPD_30	YJM975YJM975	YJM975/Y12	246771
22	19	YJM975YJM975 rho YJM975/Y12 G1 d97	YPD	30	D	YPD_30	YJM975YJM975	YJM975/Y12	231650
23	19	YJM975YJM975 rho YJM975/Y12 G1 d115	YPD	30	D	YPD_30	YJM975YJM975	YJM975/Y12	229391
24	19	YJM975YJM975 rho YJM975 control d2	YPD	30	D	YPD_30	YJM975YJM975	YJM975	232291
25	19	YJM975YJM975 rho YJM975/Y12 G1 d114	YPD	30	D	YPD_30	YJM975YJM975	YJM975/Y12	239700
26	19	YJM975YJM975 rho YJM975/Y12 G1 d113	YPD	30	D	YPD_30	YJM975YJM975	YJM975/Y12	257785
27	19	YJM975YJM975 rho YJM975/Y12 G1 d104	YPD	30	D	YPD_30	YJM975YJM975	YJM975/Y12	258904
28	19	YJM975YJM975 rho YJM975/Y12 G1 d130	YPD	30	D	YPD_30	YJM975YJM975	YJM975/Y12	235440
29	19	YJM975YJM975 rho YJM975/Y12 G1 d129	YPD	30	D	YPD_30	YJM975YJM975	YJM975/Y12	248345
30	19	by	YPD	30	D	YPD_30	by	by	251143
3	20	YJM975YJM975 rho YJM975/Y12 G1 d114	YPD	30	D	YPD_30	YJM975YJM975	YJM975/Y12	199579
4	20	YJM975YJM975 rho YJM975 control d1	YPD	30	D	YPD_30	YJM975YJM975	YJM975	231107
5	20	YJM975YJM975 rho YJM975/Y12 G1 d126	YPD	30	D	YPD_30	YJM975YJM975	YJM975/Y12	234285
7	20	YJM975YJM975 rho YJM975/Y12 G1 d109	YPD	30	D	YPD_30	YJM975YJM975	YJM975/Y12	255471
8	20	YJM975YJM975 rho YJM975/Y12 G1 d122	YPD	30	D	YPD_30	YJM975YJM975	YJM975/Y12	252786
9	20	YJM975YJM975 rho YJM975/Y12 G1 d103	YPD	30	D	YPD_30	YJM975YJM975	YJM975/Y12	268308
10	20	YJM975YJM975 rho YJM975/Y12 G1 d113	YPD	30	D	YPD_30	YJM975YJM975	YJM975/Y12	257811
11	20	YJM975YJM975 rho YJM975/Y12 G1 d130	YPD	30	D	YPD_30	YJM975YJM975	YJM975/Y12	248496
12	20	YJM975YJM975 rho YJM975/Y12 G1 d104	YPD	30	D	YPD_30	YJM975YJM975	YJM975/Y12	264122
13	20	YJM975YJM975 rho YJM975/Y12 G1 d130	YPD	30	D	YPD_30	YJM975YJM975	YJM975/Y12	246396
14	20	YJM975YJM975 rho YJM975/Y12 G1 d107	YPD	30	D	YPD_30	YJM975YJM975	YJM975/Y12	234711
15	20	YJM975YJM975 rho YJM975/Y12 G1 d95	YPD	30	D	YPD_30	YJM975YJM975	YJM975/Y12	244415
16	20	YJM975YJM975 rho YJM975/Y12 G1 d112	YPD	30	D	YPD_30	YJM975YJM975	YJM975/Y12	232105
17	20	YJM975YJM975 rho YJM975/Y12 G1 d95	YPD	30	D	YPD_30	YJM975YJM975	YJM975/Y12	233002
18	20	YJM975YJM975 rho YJM975/Y12 G1 d86	YPD	30	D	YPD_30	YJM975YJM975	YJM975/Y12	251916
19	20	YJM975YJM975 rho YJM975/Y12 G1 d110	YPD	30	D	YPD_30	YJM975YJM975	YJM975/Y12	237519
20	20	YJM975YJM975 rho YJM975/Y12 G1 d112	YPD	30	D	YPD_30	YJM975YJM975	YJM975/Y12	249857
21	20	by	YPD	30	D	YPD_30	by	by	209785
22	20	YJM975YJM975 rho YJM975/Y12 G1 d83	YPD	30	D	YPD_30	YJM975YJM975	YJM975/Y12	248854
23	20	YJM975YJM975 rho YJM975/Y12 G1 d101	YPD	30	D	YPD_30	YJM975YJM975	YJM975/Y12	239759
24	20	YJM975YJM975 rho YJM975/Y12 G1 d113	YPD	30	D	YPD_30	YJM975YJM975	YJM975/Y12	234784
25	20	YJM975YJM975 rho YJM975/Y12 G1 d96	YPD	30	D	YPD_30	YJM975YJM975	YJM975/Y12	236233
26	20	YJM975YJM975 rho YJM975/Y12 G1 d101	YPD	30	D	YPD_30	YJM975YJM975	YJM975/Y12	244602
27	20	YJM975YJM975 rho YJM975/Y12 G1 d117	YPD	30	D	YPD_30	YJM975YJM975	YJM975/Y12	248507
28	20	YJM975YJM975 rho YJM975/Y12 G1 d89	YPD	30	D	YPD_30	YJM975YJM975	YJM975/Y12	238552
29	20	YJM975YJM975 rho YJM975/Y12 G1 d108	YPD	30	D	YPD_30	YJM975YJM975	YJM975/Y12	227614
30	20	YJM975YJM975 rho YJM975 control d1	YPD	30	D	YPD_30	YJM975YJM975	YJM975	254439
3	21	YJM975YJM975 rho YJM975/Y12 G1 d114	YPD	30	D	YPD_30	YJM975YJM975	YJM975/Y12	195816
4	21	YJM975YJM975 rho YJM975/Y12 G1 d97	YPD	30	D	YPD_30	YJM975YJM975	YJM975/Y12	209053
5	21	YJM975YJM975 rho YJM975/Y12 G1 d88	YPD	30	D	YPD_30	YJM975YJM975	YJM975/Y12	225198
6	21	YJM975YJM975 rho YJM975/Y12 G1 d96	YPD	30	D	YPD_30	YJM975YJM975	YJM975/Y12	241275
7	21	YJM975YJM975 rho YJM975/Y12 G1 d116	YPD	30	D	YPD_30	YJM975YJM975	YJM975/Y12	256715
8	21	YJM975YJM975 rho YJM975/Y12 G1 d124	YPD	30	D	YPD_30	YJM975YJM975	YJM975/Y12	258641
9	21	YJM975YJM975 rho YJM975/Y12 G1 d87	YPD	30	D	YPD_30	YJM975YJM975	YJM975/Y12	270361
10	21	YJM975YJM975 rho YJM975/Y12 G1 d106	YPD	30	D	YPD_30	YJM975YJM975	YJM975/Y12	253250
11	21	YJM975YJM975 rho YJM975/Y12 G1 d122	YPD	30	D	YPD_30	YJM975YJM975	YJM975/Y12	245188
12	21	YJM975YJM975 rho YJM975/Y12 G1 d105	YPD	30	D	YPD_30	YJM975YJM975	YJM975/Y12	237626
13	21	YJM975YJM975 rho YJM975/Y12 G1 d101	YPD	30	D	YPD_30	YJM975YJM975	YJM975/Y12	243882
14	21	YJM975YJM975 rho YJM975/Y12 G1 d122	YPD	30	D	YPD_30	YJM975YJM975	YJM975/Y12	228705
15	21	YJM975YJM975 rho YJM975/Y12 G1 d100	YPD	30	D	YPD_30	YJM975YJM975	YJM975/Y12	231289
16	21	YJM975YJM975 rho Y12 control d2	YPD	30	D	YPD_30	YJM975YJM975	Y12	243498
17	21	YJM975YJM975 rho YJM975/Y12 G1 d87	YPD	30	D	YPD_30	YJM975YJM975	YJM975/Y12	240410
18	21	YJM975YJM975 rho YJM975/Y12 G1 d88	YPD	30	D	YPD_30	YJM975YJM975	YJM975/Y12	221081
19	21	YJM975YJM975 rho YJM975/Y12 G1 d92	YPD	30	D	YPD_30	YJM975YJM975	YJM975/Y12	240947
20	21	YJM975YJM975 rho YJM975/Y12 G1 d122	YPD	30	D	YPD_30	YJM975YJM975	YJM975/Y12	237076
21	21	YJM975YJM975 rho YJM975/Y12 G1 d100	YPD	30	D	YPD_30	YJM975YJM975	YJM975/Y12	254889
22	21	YJM975YJM975 rho YJM975/Y12 G1 d87	YPD	30	D	YPD_30	YJM975YJM975	YJM975/Y12	249117
23	21	YJM975YJM975 rho YJM975/Y12 G1 d113	YPD	30	D	YPD_30	YJM975YJM975	YJM975/Y12	225429
24	21	YJM975YJM975 rho YJM975/Y12 G1 d92	YPD	30	D	YPD_30	YJM975YJM975	YJM975/Y12	233794
25	21	YJM975YJM975 rho YJM975/Y12 G1 d119	YPD	30	D	YPD_30	YJM975YJM975	YJM975/Y12	245982
26	21	YJM975YJM975 rho YJM975/Y12 G1 d119	YPD	30	D	YPD_30	YJM975YJM975	YJM975/Y12	254444
27	21	YJM975YJM975 rho YJM975/Y12 G1 d124	YPD	30	D	YPD_30	YJM975YJM975	YJM975/Y12	238320
28	21	YJM975YJM975 rho YJM975/Y12 G1 d109	YPD	30	D	YPD_30	YJM975YJM975	YJM975/Y12	238920
29	21	YJM975YJM975 rho Y12 control d2	YPD	30	D	YPD_30	YJM975YJM975	Y12	243897
30	21	YJM975YJM975 rho YJM975/Y12 G1 d94	YPD	30	D	YPD_30	YJM975YJM975	YJM975/Y12	226564
3	22	YJM975YJM975 rho YJM975/Y12 G1 d130	YPD	30	D	YPD_30	YJM975YJM975	YJM975/Y12	205068
4	22	YJM975YJM975 rho Y12 control d1	YPD	30	D	YPD_30	YJM975YJM975	Y12	222794
5	22	YJM975YJM975 rho YJM975/Y12 G1 d128	YPD	30	D	YPD_30	YJM975YJM975	YJM975/Y12	231880
6	22	YJM975YJM975 rho YJM975/Y12 G1 d122	YPD	30	D	YPD_30	YJM975YJM975	YJM975/Y12	251424
7	22	YJM975YJM975 rho YJM975/Y12 G1 d114	YPD	30	D	YPD_30	YJM975YJM975	YJM975/Y12	259632
8	22	YJM975YJM975 rho YJM975/Y12 G1 d122	YPD	30	D	YPD_30	YJM975YJM975	YJM975/Y12	262929
9	22	by	YPD	30	D	YPD_30	by	by	248190
10	22	YJM975YJM975 rho YJM975/Y12 G1 d96	YPD	30	D	YPD_30	YJM975YJM975	YJM975/Y12	257263
11	22	YJM975YJM975 rho YJM975/Y12 G1 d100	YPD	30	D	YPD_30	YJM975YJM975	YJM975/Y12	248645
13	22	YJM975YJM975 rho YJM975/Y12 G1 d105	YPD	30	D	YPD_30	YJM975YJM975	YJM975/Y12	249576
14	22	YJM975YJM975 rho YJM975/Y12 G1 d112	YPD	30	D	YPD_30	YJM975YJM975	YJM975/Y12	235744
15	22	YJM975YJM975 rho YJM975/Y12 G1 d106	YPD	30	D	YPD_30	YJM975YJM975	YJM975/Y12	249802
16	22	by	YPD	30	D	YPD_30	by	by	229164
17	22	YJM975YJM975 rho YJM975/Y12 G1 d112	YPD	30	D	YPD_30	YJM975YJM975	YJM975/Y12	238063
18	22	YJM975YJM975 rho YJM975/Y12 G1 d112	YPD	30	D	YPD_30	YJM975YJM975	YJM975/Y12	226343
19	22	YJM975YJM975 rho YJM975/Y12 G1 d129	YPD	30	D	YPD_30	YJM975YJM975	YJM975/Y12	233473
20	22	YJM975YJM975 rho YJM975/Y12 G1 d96	YPD	30	D	YPD_30	YJM975YJM975	YJM975/Y12	223787
22	22	YJM975YJM975 rho YJM975/Y12 G1 d114	YPD	30	D	YPD_30	YJM975YJM975	YJM975/Y12	236868
23	22	YJM975YJM975 rho YJM975/Y12 G1 d98	YPD	30	D	YPD_30	YJM975YJM975	YJM975/Y12	242991
24	22	YJM975YJM975 rho YJM975/Y12 G1 d104	YPD	30	D	YPD_30	YJM975YJM975	YJM975/Y12	234947
25	22	YJM975YJM975 rho YJM975/Y12 G1 d119	YPD	30	D	YPD_30	YJM975YJM975	YJM975/Y12	265604
26	22	by	YPD	30	D	YPD_30	by	by	223046
27	22	YJM975YJM975 rho YJM975/Y12 G1 d123	YPD	30	D	YPD_30	YJM975YJM975	YJM975/Y12	248199
28	22	YJM975YJM975 rho YJM975/Y12 G1 d124	YPD	30	D	YPD_30	YJM975YJM975	YJM975/Y12	232957
29	22	YJM975YJM975 rho YJM975/Y12 G1 d103	YPD	30	D	YPD_30	YJM975YJM975	YJM975/Y12	232060
30	22	YJM975YJM975 rho YJM975/Y12 G1 d112	YPD	30	D	YPD_30	YJM975YJM975	YJM975/Y12	233253
3	23	YJM975YJM975 rho Y12 control d2	YPD	30	D	YPD_30	YJM975YJM975	Y12	207510
4	23	by	YPD	30	D	YPD_30	by	by	231306
5	23	YJM975YJM975 rho YJM975/Y12 G1 d114	YPD	30	D	YPD_30	YJM975YJM975	YJM975/Y12	236106
7	23	YJM975YJM975 rho YJM975/Y12 G1 d114	YPD	30	D	YPD_30	YJM975YJM975	YJM975/Y12	268052
8	23	YJM975YJM975 rho YJM975/Y12 G1 d90	YPD	30	D	YPD_30	YJM975YJM975	YJM975/Y12	257404
9	23	YJM975YJM975 rho YJM975/Y12 G1 d86	YPD	30	D	YPD_30	YJM975YJM975	YJM975/Y12	257274
10	23	YJM975YJM975 rho YJM975/Y12 G1 d108	YPD	30	D	YPD_30	YJM975YJM975	YJM975/Y12	237755
11	23	YJM975YJM975 rho YJM975/Y12 G1 d129	YPD	30	D	YPD_30	YJM975YJM975	YJM975/Y12	248285
12	23	YJM975YJM975 rho YJM975/Y12 G1 d86	YPD	30	D	YPD_30	YJM975YJM975	YJM975/Y12	247801
13	23	YJM975YJM975 rho YJM975/Y12 G1 d97	YPD	30	D	YPD_30	YJM975YJM975	YJM975/Y12	230615
14	23	YJM975YJM975 rho YJM975/Y12 G1 d107	YPD	30	D	YPD_30	YJM975YJM975	YJM975/Y12	245957
15	23	YJM975YJM975 rho YJM975/Y12 G1 d123	YPD	30	D	YPD_30	YJM975YJM975	YJM975/Y12	234900
16	23	YJM975YJM975 rho YJM975/Y12 G1 d96	YPD	30	D	YPD_30	YJM975YJM975	YJM975/Y12	249165
17	23	YJM975YJM975 rho YJM975/Y12 G1 d96	YPD	30	D	YPD_30	YJM975YJM975	YJM975/Y12	219298
18	23	YJM975YJM975 rho YJM975/Y12 G1 d115	YPD	30	D	YPD_30	YJM975YJM975	YJM975/Y12	244017
19	23	YJM975YJM975 rho YJM975/Y12 G1 d96	YPD	30	D	YPD_30	YJM975YJM975	YJM975/Y12	230831
20	23	YJM975YJM975 rho YJM975/Y12 G1 d124	YPD	30	D	YPD_30	YJM975YJM975	YJM975/Y12	229813
21	23	YJM975YJM975 rho YJM975/Y12 G1 d105	YPD	30	D	YPD_30	YJM975YJM975	YJM975/Y12	223308
22	23	YJM975YJM975 rho YJM975/Y12 G1 d110	YPD	30	D	YPD_30	YJM975YJM975	YJM975/Y12	240596
23	23	YJM975YJM975 rho YJM975/Y12 G1 d104	YPD	30	D	YPD_30	YJM975YJM975	YJM975/Y12	219787
24	23	YJM975YJM975 rho YJM975/Y12 G1 d132	YPD	30	D	YPD_30	YJM975YJM975	YJM975/Y12	237947
25	23	by	YPD	30	D	YPD_30	by	by	223177
26	23	YJM975YJM975 rho YJM975/Y12 G1 d83	YPD	30	D	YPD_30	YJM975YJM975	YJM975/Y12	260996
27	23	YJM975YJM975 rho YJM975/Y12 G1 d112	YPD	30	D	YPD_30	YJM975YJM975	YJM975/Y12	234126
28	23	YJM975YJM975 rho YJM975/Y12 G1 d108	YPD	30	D	YPD_30	YJM975YJM975	YJM975/Y12	239372
29	23	YJM975YJM975 rho YJM975/Y12 G1 d128	YPD	30	D	YPD_30	YJM975YJM975	YJM975/Y12	230165
30	23	YJM975YJM975 rho YJM975/Y12 G1 d118	YPD	30	D	YPD_30	YJM975YJM975	YJM975/Y12	219672
3	24	YJM975YJM975 rho Y12 control d1	YPD	30	D	YPD_30	YJM975YJM975	Y12	207074
4	24	YJM975YJM975 rho YJM975/Y12 G1 d89	YPD	30	D	YPD_30	YJM975YJM975	YJM975/Y12	221263
5	24	YJM975YJM975 rho YJM975/Y12 G1 d117	YPD	30	D	YPD_30	YJM975YJM975	YJM975/Y12	235478
6	24	YJM975YJM975 rho YJM975/Y12 G1 d132	YPD	30	D	YPD_30	YJM975YJM975	YJM975/Y12	246195
7	24	YJM975YJM975 rho YJM975/Y12 G1 d115	YPD	30	D	YPD_30	YJM975YJM975	YJM975/Y12	268215
8	24	YJM975YJM975 rho YJM975/Y12 G1 d126	YPD	30	D	YPD_30	YJM975YJM975	YJM975/Y12	254733
9	24	YJM975YJM975 rho YJM975/Y12 G1 d130	YPD	30	D	YPD_30	YJM975YJM975	YJM975/Y12	250834
10	24	YJM975YJM975 rho YJM975/Y12 G1 d115	YPD	30	D	YPD_30	YJM975YJM975	YJM975/Y12	251972
12	24	YJM975YJM975 rho YJM975/Y12 G1 d115	YPD	30	D	YPD_30	YJM975YJM975	YJM975/Y12	246189
13	24	YJM975YJM975 rho YJM975/Y12 G1 d105	YPD	30	D	YPD_30	YJM975YJM975	YJM975/Y12	235928
14	24	by	YPD	30	D	YPD_30	by	by	230431
15	24	YJM975YJM975 rho YJM975/Y12 G1 d106	YPD	30	D	YPD_30	YJM975YJM975	YJM975/Y12	240729
16	24	YJM975YJM975 rho Y12 control d1	YPD	30	D	YPD_30	YJM975YJM975	Y12	232583
17	24	YJM975YJM975 rho YJM975/Y12 G1 d87	YPD	30	D	YPD_30	YJM975YJM975	YJM975/Y12	223087
18	24	YJM975YJM975 rho YJM975/Y12 G1 d92	YPD	30	D	YPD_30	YJM975YJM975	YJM975/Y12	215805
19	24	YJM975YJM975 rho YJM975/Y12 G1 d123	YPD	30	D	YPD_30	YJM975YJM975	YJM975/Y12	240722
20	24	YJM975YJM975 rho YJM975/Y12 G1 d114	YPD	30	D	YPD_30	YJM975YJM975	YJM975/Y12	223778
21	24	YJM975YJM975 rho Y12 control d1	YPD	30	D	YPD_30	YJM975YJM975	Y12	232782
22	24	YJM975YJM975 rho YJM975/Y12 G1 d101	YPD	30	D	YPD_30	YJM975YJM975	YJM975/Y12	219333
23	24	YJM975YJM975 rho YJM975/Y12 G1 d116	YPD	30	D	YPD_30	YJM975YJM975	YJM975/Y12	232899
24	24	YJM975YJM975 rho YJM975/Y12 G1 d86	YPD	30	D	YPD_30	YJM975YJM975	YJM975/Y12	236726
25	24	YJM975YJM975 rho YJM975/Y12 G1 d126	YPD	30	D	YPD_30	YJM975YJM975	YJM975/Y12	246210
26	24	YJM975YJM975 rho YJM975/Y12 G1 d90	YPD	30	D	YPD_30	YJM975YJM975	YJM975/Y12	227964
27	24	YJM975YJM975 rho YJM975/Y12 G1 d83	YPD	30	D	YPD_30	YJM975YJM975	YJM975/Y12	225739
28	24	YJM975YJM975 rho YJM975/Y12 G1 d118	YPD	30	D	YPD_30	YJM975YJM975	YJM975/Y12	235370
29	24	YJM975YJM975 rho YJM975/Y12 G1 d97	YPD	30	D	YPD_30	YJM975YJM975	YJM975/Y12	208424
3	25	YJM975YJM975 rho YJM975/Y12 G1 d130	YPD	30	D	YPD_30	YJM975YJM975	YJM975/Y12	206157
4	25	YJM975YJM975 rho YJM975/Y12 G1 d90	YPD	30	D	YPD_30	YJM975YJM975	YJM975/Y12	219821
5	25	YJM975YJM975 rho YJM975/Y12 G1 d127	YPD	30	D	YPD_30	YJM975YJM975	YJM975/Y12	226218
6	25	YJM975YJM975 rho YJM975/Y12 G1 d91	YPD	30	D	YPD_30	YJM975YJM975	YJM975/Y12	240167
7	25	YJM975YJM975 rho YJM975/Y12 G1 d112	YPD	30	D	YPD_30	YJM975YJM975	YJM975/Y12	241126
8	25	YJM975YJM975 rho YJM975/Y12 G1 d107	YPD	30	D	YPD_30	YJM975YJM975	YJM975/Y12	246871
9	25	YJM975YJM975 rho YJM975/Y12 G1 d123	YPD	30	D	YPD_30	YJM975YJM975	YJM975/Y12	248485
10	25	YJM975YJM975 rho YJM975/Y12 G1 d114	YPD	30	D	YPD_30	YJM975YJM975	YJM975/Y12	252194
11	25	YJM975YJM975 rho YJM975/Y12 G1 d122	YPD	30	D	YPD_30	YJM975YJM975	YJM975/Y12	253835
12	25	YJM975YJM975 rho YJM975/Y12 G1 d83	YPD	30	D	YPD_30	YJM975YJM975	YJM975/Y12	236871
13	25	YJM975YJM975 rho YJM975/Y12 G1 d124	YPD	30	D	YPD_30	YJM975YJM975	YJM975/Y12	233047
14	25	YJM975YJM975 rho YJM975/Y12 G1 d105	YPD	30	D	YPD_30	YJM975YJM975	YJM975/Y12	231463
15	25	YJM975YJM975 rho YJM975/Y12 G1 d128	YPD	30	D	YPD_30	YJM975YJM975	YJM975/Y12	228586
16	25	YJM975YJM975 rho YJM975/Y12 G1 d115	YPD	30	D	YPD_30	YJM975YJM975	YJM975/Y12	231599
17	25	YJM975YJM975 rho YJM975/Y12 G1 d115	YPD	30	D	YPD_30	YJM975YJM975	YJM975/Y12	217031
18	25	YJM975YJM975 rho YJM975/Y12 G1 d112	YPD	30	D	YPD_30	YJM975YJM975	YJM975/Y12	213985
19	25	YJM975YJM975 rho YJM975/Y12 G1 d100	YPD	30	D	YPD_30	YJM975YJM975	YJM975/Y12	238292
20	25	YJM975YJM975 rho YJM975/Y12 G1 d88	YPD	30	D	YPD_30	YJM975YJM975	YJM975/Y12	231852
21	25	YJM975YJM975 rho YJM975/Y12 G1 d122	YPD	30	D	YPD_30	YJM975YJM975	YJM975/Y12	226833
22	25	YJM975YJM975 rho YJM975/Y12 G1 d113	YPD	30	D	YPD_30	YJM975YJM975	YJM975/Y12	231186
23	25	YJM975YJM975 rho YJM975/Y12 G1 d86	YPD	30	D	YPD_30	YJM975YJM975	YJM975/Y12	228948
24	25	YJM975YJM975 rho YJM975/Y12 G1 d122	YPD	30	D	YPD_30	YJM975YJM975	YJM975/Y12	228057
25	25	YJM975YJM975 rho YJM975/Y12 G1 d113	YPD	30	D	YPD_30	YJM975YJM975	YJM975/Y12	233966
26	25	YJM975YJM975 rho YJM975/Y12 G1 d110	YPD	30	D	YPD_30	YJM975YJM975	YJM975/Y12	233292
27	25	YJM975YJM975 rho YJM975/Y12 G1 d104	YPD	30	D	YPD_30	YJM975YJM975	YJM975/Y12	216670
28	25	YJM975YJM975 rho YJM975/Y12 G1 d126	YPD	30	D	YPD_30	YJM975YJM975	YJM975/Y12	229075
30	25	YJM975YJM975 rho YJM975/Y12 G1 d126	YPD	30	D	YPD_30	YJM975YJM975	YJM975/Y12	212327
3	26	YJM975YJM975 rho YJM975/Y12 G1 d108	YPD	30	D	YPD_30	YJM975YJM975	YJM975/Y12	200676
4	26	YJM975YJM975 rho YJM975/Y12 G1 d87	YPD	30	D	YPD_30	YJM975YJM975	YJM975/Y12	216971
5	26	YJM975YJM975 rho YJM975/Y12 G1 d97	YPD	30	D	YPD_30	YJM975YJM975	YJM975/Y12	225677
6	26	YJM975YJM975 rho YJM975/Y12 G1 d103	YPD	30	D	YPD_30	YJM975YJM975	YJM975/Y12	236969
7	26	YJM975YJM975 rho YJM975/Y12 G1 d85	YPD	30	D	YPD_30	YJM975YJM975	YJM975/Y12	251042
8	26	YJM975YJM975 rho YJM975/Y12 G1 d90	YPD	30	D	YPD_30	YJM975YJM975	YJM975/Y12	240037
9	26	YJM975YJM975 rho YJM975/Y12 G1 d118	YPD	30	D	YPD_30	YJM975YJM975	YJM975/Y12	246866
10	26	YJM975YJM975 rho YJM975/Y12 G1 d130	YPD	30	D	YPD_30	YJM975YJM975	YJM975/Y12	239478
11	26	YJM975YJM975 rho YJM975/Y12 G1 d95	YPD	30	D	YPD_30	YJM975YJM975	YJM975/Y12	240229
12	26	YJM975YJM975 rho YJM975/Y12 G1 d87	YPD	30	D	YPD_30	YJM975YJM975	YJM975/Y12	241783
13	26	YJM975YJM975 rho YJM975/Y12 G1 d83	YPD	30	D	YPD_30	YJM975YJM975	YJM975/Y12	228956
14	26	YJM975YJM975 rho YJM975/Y12 G1 d105	YPD	30	D	YPD_30	YJM975YJM975	YJM975/Y12	243055
15	26	YJM975YJM975 rho YJM975/Y12 G1 d106	YPD	30	D	YPD_30	YJM975YJM975	YJM975/Y12	223780
16	26	YJM975YJM975 rho YJM975/Y12 G1 d87	YPD	30	D	YPD_30	YJM975YJM975	YJM975/Y12	236804
17	26	YJM975YJM975 rho YJM975/Y12 G1 d107	YPD	30	D	YPD_30	YJM975YJM975	YJM975/Y12	239051
18	26	YJM975YJM975 rho YJM975/Y12 G1 d102	YPD	30	D	YPD_30	YJM975YJM975	YJM975/Y12	225682
19	26	YJM975YJM975 rho YJM975/Y12 G1 d124	YPD	30	D	YPD_30	YJM975YJM975	YJM975/Y12	221708
20	26	YJM975YJM975 rho YJM975/Y12 G1 d128	YPD	30	D	YPD_30	YJM975YJM975	YJM975/Y12	226325
21	26	YJM975YJM975 rho Y12 control d1	YPD	30	D	YPD_30	YJM975YJM975	Y12	236156
22	26	YJM975YJM975 rho YJM975/Y12 G1 d95	YPD	30	D	YPD_30	YJM975YJM975	YJM975/Y12	225187
23	26	YJM975YJM975 rho YJM975/Y12 G1 d91	YPD	30	D	YPD_30	YJM975YJM975	YJM975/Y12	229457
24	26	YJM975YJM975 rho YJM975/Y12 G1 d117	YPD	30	D	YPD_30	YJM975YJM975	YJM975/Y12	228649
25	26	YJM975YJM975 rho YJM975/Y12 G1 d90	YPD	30	D	YPD_30	YJM975YJM975	YJM975/Y12	238671
26	26	YJM975YJM975 rho YJM975/Y12 G1 d108	YPD	30	D	YPD_30	YJM975YJM975	YJM975/Y12	241716
27	26	YJM975YJM975 rho YJM975/Y12 G1 d102	YPD	30	D	YPD_30	YJM975YJM975	YJM975/Y12	221141
28	26	YJM975YJM975 rho YJM975/Y12 G1 d91	YPD	30	D	YPD_30	YJM975YJM975	YJM975/Y12	234725
29	26	YJM975YJM975 rho YJM975 control d2	YPD	30	D	YPD_30	YJM975YJM975	YJM975	221449
30	26	YJM975YJM975 rho YJM975/Y12 G1 d110	YPD	30	D	YPD_30	YJM975YJM975	YJM975/Y12	216454
3	27	YJM975YJM975 rho YJM975/Y12 G1 d92	YPD	30	D	YPD_30	YJM975YJM975	YJM975/Y12	196001
4	27	YJM975YJM975 rho YJM975/Y12 G1 d132	YPD	30	D	YPD_30	YJM975YJM975	YJM975/Y12	212708
5	27	YJM975YJM975 rho YJM975/Y12 G1 d106	YPD	30	D	YPD_30	YJM975YJM975	YJM975/Y12	223628
6	27	YJM975YJM975 rho YJM975/Y12 G1 d85	YPD	30	D	YPD_30	YJM975YJM975	YJM975/Y12	248486
7	27	by	YPD	30	D	YPD_30	by	by	248107
8	27	YJM975YJM975 rho YJM975/Y12 G1 d87	YPD	30	D	YPD_30	YJM975YJM975	YJM975/Y12	262804
9	27	YJM975YJM975 rho YJM975 control d1	YPD	30	D	YPD_30	YJM975YJM975	YJM975	268073
10	27	YJM975YJM975 rho Y12 control d2	YPD	30	D	YPD_30	YJM975YJM975	Y12	255687
11	27	YJM975YJM975 rho YJM975/Y12 G1 d123	YPD	30	D	YPD_30	YJM975YJM975	YJM975/Y12	251001
12	27	YJM975YJM975 rho YJM975/Y12 G1 d100	YPD	30	D	YPD_30	YJM975YJM975	YJM975/Y12	243148
13	27	YJM975YJM975 rho YJM975/Y12 G1 d97	YPD	30	D	YPD_30	YJM975YJM975	YJM975/Y12	247327
14	27	by	YPD	30	D	YPD_30	by	by	222905
15	27	YJM975YJM975 rho YJM975/Y12 G1 d97	YPD	30	D	YPD_30	YJM975YJM975	YJM975/Y12	233748
16	27	YJM975YJM975 rho YJM975/Y12 G1 d88	YPD	30	D	YPD_30	YJM975YJM975	YJM975/Y12	238351
17	27	by	YPD	30	D	YPD_30	by	by	213675
18	27	YJM975YJM975 rho YJM975/Y12 G1 d102	YPD	30	D	YPD_30	YJM975YJM975	YJM975/Y12	226159
19	27	YJM975YJM975 rho Y12 control d1	YPD	30	D	YPD_30	YJM975YJM975	Y12	231010
20	27	YJM975YJM975 rho YJM975/Y12 G1 d83	YPD	30	D	YPD_30	YJM975YJM975	YJM975/Y12	217399
21	27	YJM975YJM975 rho YJM975/Y12 G1 d91	YPD	30	D	YPD_30	YJM975YJM975	YJM975/Y12	227007
22	27	YJM975YJM975 rho YJM975/Y12 G1 d86	YPD	30	D	YPD_30	YJM975YJM975	YJM975/Y12	215625
23	27	YJM975YJM975 rho YJM975/Y12 G1 d114	YPD	30	D	YPD_30	YJM975YJM975	YJM975/Y12	229113
24	27	YJM975YJM975 rho YJM975/Y12 G1 d119	YPD	30	D	YPD_30	YJM975YJM975	YJM975/Y12	232937
25	27	YJM975YJM975 rho YJM975/Y12 G1 d112	YPD	30	D	YPD_30	YJM975YJM975	YJM975/Y12	231996
26	27	YJM975YJM975 rho YJM975/Y12 G1 d95	YPD	30	D	YPD_30	YJM975YJM975	YJM975/Y12	232003
27	27	YJM975YJM975 rho YJM975/Y12 G1 d122	YPD	30	D	YPD_30	YJM975YJM975	YJM975/Y12	231694
28	27	YJM975YJM975 rho YJM975/Y12 G1 d117	YPD	30	D	YPD_30	YJM975YJM975	YJM975/Y12	217729
29	27	YJM975YJM975 rho YJM975/Y12 G1 d119	YPD	30	D	YPD_30	YJM975YJM975	YJM975/Y12	218307
30	27	YJM975YJM975 rho YJM975/Y12 G1 d110	YPD	30	D	YPD_30	YJM975YJM975	YJM975/Y12	209103
3	28	YJM975YJM975 rho YJM975/Y12 G1 d101	YPD	30	D	YPD_30	YJM975YJM975	YJM975/Y12	205399
4	28	YJM975YJM975 rho YJM975/Y12 G1 d106	YPD	30	D	YPD_30	YJM975YJM975	YJM975/Y12	211599
5	28	YJM975YJM975 rho YJM975/Y12 G1 d100	YPD	30	D	YPD_30	YJM975YJM975	YJM975/Y12	220005
6	28	YJM975YJM975 rho YJM975/Y12 G1 d110	YPD	30	D	YPD_30	YJM975YJM975	YJM975/Y12	247381
7	28	YJM975YJM975 rho YJM975/Y12 G1 d108	YPD	30	D	YPD_30	YJM975YJM975	YJM975/Y12	249411
8	28	YJM975YJM975 rho YJM975/Y12 G1 d101	YPD	30	D	YPD_30	YJM975YJM975	YJM975/Y12	246479
9	28	YJM975YJM975 rho YJM975/Y12 G1 d83	YPD	30	D	YPD_30	YJM975YJM975	YJM975/Y12	242118
10	28	YJM975YJM975 rho YJM975/Y12 G1 d96	YPD	30	D	YPD_30	YJM975YJM975	YJM975/Y12	241051
11	28	by	YPD	30	D	YPD_30	by	by	234935
12	28	YJM975YJM975 rho YJM975/Y12 G1 d119	YPD	30	D	YPD_30	YJM975YJM975	YJM975/Y12	247378
13	28	YJM975YJM975 rho Y12 control d2	YPD	30	D	YPD_30	YJM975YJM975	Y12	239131
14	28	YJM975YJM975 rho Y12 control d2	YPD	30	D	YPD_30	YJM975YJM975	Y12	249327
15	28	YJM975YJM975 rho YJM975/Y12 G1 d132	YPD	30	D	YPD_30	YJM975YJM975	YJM975/Y12	233906
16	28	YJM975YJM975 rho YJM975/Y12 G1 d86	YPD	30	D	YPD_30	YJM975YJM975	YJM975/Y12	233899
17	28	YJM975YJM975 rho YJM975/Y12 G1 d112	YPD	30	D	YPD_30	YJM975YJM975	YJM975/Y12	233209
18	28	YJM975YJM975 rho YJM975/Y12 G1 d113	YPD	30	D	YPD_30	YJM975YJM975	YJM975/Y12	235643
19	28	YJM975YJM975 rho YJM975/Y12 G1 d102	YPD	30	D	YPD_30	YJM975YJM975	YJM975/Y12	221067
20	28	YJM975YJM975 rho YJM975/Y12 G1 d116	YPD	30	D	YPD_30	YJM975YJM975	YJM975/Y12	219183
21	28	YJM975YJM975 rho YJM975 control d1	YPD	30	D	YPD_30	YJM975YJM975	YJM975	223653
22	28	YJM975YJM975 rho YJM975/Y12 G1 d109	YPD	30	D	YPD_30	YJM975YJM975	YJM975/Y12	221736
23	28	YJM975YJM975 rho YJM975/Y12 G1 d118	YPD	30	D	YPD_30	YJM975YJM975	YJM975/Y12	232809
24	28	YJM975YJM975 rho YJM975/Y12 G1 d95	YPD	30	D	YPD_30	YJM975YJM975	YJM975/Y12	230741
25	28	YJM975YJM975 rho YJM975/Y12 G1 d109	YPD	30	D	YPD_30	YJM975YJM975	YJM975/Y12	221828
26	28	YJM975YJM975 rho YJM975/Y12 G1 d108	YPD	30	D	YPD_30	YJM975YJM975	YJM975/Y12	230516
27	28	YJM975YJM975 rho YJM975/Y12 G1 d101	YPD	30	D	YPD_30	YJM975YJM975	YJM975/Y12	228203
28	28	YJM975YJM975 rho YJM975/Y12 G1 d100	YPD	30	D	YPD_30	YJM975YJM975	YJM975/Y12	233620
29	28	YJM975YJM975 rho YJM975/Y12 G1 d98	YPD	30	D	YPD_30	YJM975YJM975	YJM975/Y12	227527
30	28	YJM975YJM975 rho YJM975/Y12 G1 d97	YPD	30	D	YPD_30	YJM975YJM975	YJM975/Y12	220025
3	29	YJM975YJM975 rho YJM975/Y12 G1 d97	YPD	30	D	YPD_30	YJM975YJM975	YJM975/Y12	201168
4	29	YJM975YJM975 rho YJM975/Y12 G1 d101	YPD	30	D	YPD_30	YJM975YJM975	YJM975/Y12	212490
5	29	YJM975YJM975 rho YJM975/Y12 G1 d124	YPD	30	D	YPD_30	YJM975YJM975	YJM975/Y12	235249
6	29	by	YPD	30	D	YPD_30	by	by	251047
7	29	YJM975YJM975 rho YJM975/Y12 G1 d105	YPD	30	D	YPD_30	YJM975YJM975	YJM975/Y12	243220
8	29	YJM975YJM975 rho YJM975/Y12 G1 d102	YPD	30	D	YPD_30	YJM975YJM975	YJM975/Y12	258289
9	29	YJM975YJM975 rho YJM975/Y12 G1 d118	YPD	30	D	YPD_30	YJM975YJM975	YJM975/Y12	249921
10	29	YJM975YJM975 rho Y12 control d1	YPD	30	D	YPD_30	YJM975YJM975	Y12	255561
11	29	YJM975YJM975 rho YJM975/Y12 G1 d116	YPD	30	D	YPD_30	YJM975YJM975	YJM975/Y12	244862
12	29	YJM975YJM975 rho YJM975/Y12 G1 d118	YPD	30	D	YPD_30	YJM975YJM975	YJM975/Y12	245337
13	29	YJM975YJM975 rho YJM975/Y12 G1 d105	YPD	30	D	YPD_30	YJM975YJM975	YJM975/Y12	245510
14	29	YJM975YJM975 rho YJM975/Y12 G1 d114	YPD	30	D	YPD_30	YJM975YJM975	YJM975/Y12	234560
15	29	YJM975YJM975 rho YJM975/Y12 G1 d115	YPD	30	D	YPD_30	YJM975YJM975	YJM975/Y12	239565
16	29	YJM975YJM975 rho YJM975/Y12 G1 d101	YPD	30	D	YPD_30	YJM975YJM975	YJM975/Y12	224288
17	29	YJM975YJM975 rho YJM975/Y12 G1 d115	YPD	30	D	YPD_30	YJM975YJM975	YJM975/Y12	242377
18	29	YJM975YJM975 rho YJM975/Y12 G1 d95	YPD	30	D	YPD_30	YJM975YJM975	YJM975/Y12	239291
19	29	by	YPD	30	D	YPD_30	by	by	208096
20	29	YJM975YJM975 rho YJM975/Y12 G1 d103	YPD	30	D	YPD_30	YJM975YJM975	YJM975/Y12	236130
21	29	YJM975YJM975 rho YJM975/Y12 G1 d113	YPD	30	D	YPD_30	YJM975YJM975	YJM975/Y12	229908
22	29	YJM975YJM975 rho YJM975/Y12 G1 d128	YPD	30	D	YPD_30	YJM975YJM975	YJM975/Y12	226614
23	29	YJM975YJM975 rho YJM975/Y12 G1 d130	YPD	30	D	YPD_30	YJM975YJM975	YJM975/Y12	226492
24	29	YJM975YJM975 rho YJM975/Y12 G1 d96	YPD	30	D	YPD_30	YJM975YJM975	YJM975/Y12	232330
25	29	YJM975YJM975 rho YJM975/Y12 G1 d102	YPD	30	D	YPD_30	YJM975YJM975	YJM975/Y12	239991
26	29	YJM975YJM975 rho YJM975/Y12 G1 d101	YPD	30	D	YPD_30	YJM975YJM975	YJM975/Y12	224271
27	29	YJM975YJM975 rho YJM975/Y12 G1 d108	YPD	30	D	YPD_30	YJM975YJM975	YJM975/Y12	237887
28	29	YJM975YJM975 rho YJM975/Y12 G1 d91	YPD	30	D	YPD_30	YJM975YJM975	YJM975/Y12	225693
29	29	YJM975YJM975 rho YJM975/Y12 G1 d94	YPD	30	D	YPD_30	YJM975YJM975	YJM975/Y12	209906
3	30	YJM975YJM975 rho YJM975 control d2	YPD	30	D	YPD_30	YJM975YJM975	YJM975	206914
4	30	YJM975YJM975 rho YJM975/Y12 G1 d85	YPD	30	D	YPD_30	YJM975YJM975	YJM975/Y12	219424
5	30	YJM975YJM975 rho YJM975/Y12 G1 d87	YPD	30	D	YPD_30	YJM975YJM975	YJM975/Y12	228152
6	30	YJM975YJM975 rho YJM975/Y12 G1 d119	YPD	30	D	YPD_30	YJM975YJM975	YJM975/Y12	230925
7	30	YJM975YJM975 rho YJM975/Y12 G1 d102	YPD	30	D	YPD_30	YJM975YJM975	YJM975/Y12	240044
8	30	YJM975YJM975 rho YJM975/Y12 G1 d100	YPD	30	D	YPD_30	YJM975YJM975	YJM975/Y12	239499
10	30	YJM975YJM975 rho YJM975/Y12 G1 d114	YPD	30	D	YPD_30	YJM975YJM975	YJM975/Y12	237010
11	30	YJM975YJM975 rho YJM975/Y12 G1 d95	YPD	30	D	YPD_30	YJM975YJM975	YJM975/Y12	247534
12	30	YJM975YJM975 rho YJM975/Y12 G1 d119	YPD	30	D	YPD_30	YJM975YJM975	YJM975/Y12	240617
13	30	YJM975YJM975 rho YJM975/Y12 G1 d104	YPD	30	D	YPD_30	YJM975YJM975	YJM975/Y12	257282
14	30	YJM975YJM975 rho Y12 control d1	YPD	30	D	YPD_30	YJM975YJM975	Y12	225168
15	30	YJM975YJM975 rho YJM975/Y12 G1 d123	YPD	30	D	YPD_30	YJM975YJM975	YJM975/Y12	235005
16	30	YJM975YJM975 rho YJM975/Y12 G1 d101	YPD	30	D	YPD_30	YJM975YJM975	YJM975/Y12	227407
17	30	YJM975YJM975 rho YJM975/Y12 G1 d122	YPD	30	D	YPD_30	YJM975YJM975	YJM975/Y12	220400
18	30	YJM975YJM975 rho Y12 control d2	YPD	30	D	YPD_30	YJM975YJM975	Y12	230643
19	30	YJM975YJM975 rho YJM975/Y12 G1 d109	YPD	30	D	YPD_30	YJM975YJM975	YJM975/Y12	241725
20	30	YJM975YJM975 rho YJM975/Y12 G1 d88	YPD	30	D	YPD_30	YJM975YJM975	YJM975/Y12	226734
21	30	YJM975YJM975 rho YJM975/Y12 G1 d102	YPD	30	D	YPD_30	YJM975YJM975	YJM975/Y12	216026
22	30	YJM975YJM975 rho YJM975/Y12 G1 d88	YPD	30	D	YPD_30	YJM975YJM975	YJM975/Y12	222613
23	30	YJM975YJM975 rho YJM975/Y12 G1 d89	YPD	30	D	YPD_30	YJM975YJM975	YJM975/Y12	209926
24	30	YJM975YJM975 rho YJM975/Y12 G1 d123	YPD	30	D	YPD_30	YJM975YJM975	YJM975/Y12	224510
25	30	YJM975YJM975 rho YJM975/Y12 G1 d113	YPD	30	D	YPD_30	YJM975YJM975	YJM975/Y12	226326
26	30	YJM975YJM975 rho YJM975/Y12 G1 d108	YPD	30	D	YPD_30	YJM975YJM975	YJM975/Y12	226561
27	30	YJM975YJM975 rho YJM975/Y12 G1 d85	YPD	30	D	YPD_30	YJM975YJM975	YJM975/Y12	234758
28	30	YJM975YJM975 rho YJM975/Y12 G1 d90	YPD	30	D	YPD_30	YJM975YJM975	YJM975/Y12	224041
29	30	YJM975YJM975 rho YJM975/Y12 G1 d101	YPD	30	D	YPD_30	YJM975YJM975	YJM975/Y12	213672
30	30	YJM975YJM975 rho YJM975/Y12 G1 d94	YPD	30	D	YPD_30	YJM975YJM975	YJM975/Y12	210736
3	31	YJM975YJM975 rho YJM975/Y12 G1 d103	YPD	30	D	YPD_30	YJM975YJM975	YJM975/Y12	196330
4	31	YJM975YJM975 rho YJM975/Y12 G1 d85	YPD	30	D	YPD_30	YJM975YJM975	YJM975/Y12	210527
5	31	YJM975YJM975 rho YJM975/Y12 G1 d90	YPD	30	D	YPD_30	YJM975YJM975	YJM975/Y12	227410
6	31	YJM975YJM975 rho YJM975/Y12 G1 d89	YPD	30	D	YPD_30	YJM975YJM975	YJM975/Y12	235397
7	31	YJM975YJM975 rho YJM975/Y12 G1 d89	YPD	30	D	YPD_30	YJM975YJM975	YJM975/Y12	246508
8	31	YJM975YJM975 rho YJM975/Y12 G1 d89	YPD	30	D	YPD_30	YJM975YJM975	YJM975/Y12	236102
9	31	YJM975YJM975 rho YJM975/Y12 G1 d113	YPD	30	D	YPD_30	YJM975YJM975	YJM975/Y12	236994
10	31	YJM975YJM975 rho YJM975/Y12 G1 d92	YPD	30	D	YPD_30	YJM975YJM975	YJM975/Y12	247449
11	31	YJM975YJM975 rho YJM975/Y12 G1 d119	YPD	30	D	YPD_30	YJM975YJM975	YJM975/Y12	239815
12	31	YJM975YJM975 rho YJM975/Y12 G1 d112	YPD	30	D	YPD_30	YJM975YJM975	YJM975/Y12	247951
13	31	by	YPD	30	D	YPD_30	by	by	230583
14	31	YJM975YJM975 rho YJM975/Y12 G1 d94	YPD	30	D	YPD_30	YJM975YJM975	YJM975/Y12	247297
15	31	YJM975YJM975 rho YJM975/Y12 G1 d117	YPD	30	D	YPD_30	YJM975YJM975	YJM975/Y12	233396
16	31	YJM975YJM975 rho YJM975/Y12 G1 d112	YPD	30	D	YPD_30	YJM975YJM975	YJM975/Y12	227223
17	31	YJM975YJM975 rho YJM975/Y12 G1 d89	YPD	30	D	YPD_30	YJM975YJM975	YJM975/Y12	230844
18	31	YJM975YJM975 rho YJM975/Y12 G1 d109	YPD	30	D	YPD_30	YJM975YJM975	YJM975/Y12	223421
19	31	YJM975YJM975 rho YJM975/Y12 G1 d94	YPD	30	D	YPD_30	YJM975YJM975	YJM975/Y12	230943
20	31	YJM975YJM975 rho YJM975/Y12 G1 d130	YPD	30	D	YPD_30	YJM975YJM975	YJM975/Y12	226364
21	31	YJM975YJM975 rho YJM975 control d2	YPD	30	D	YPD_30	YJM975YJM975	YJM975	229961
22	31	YJM975YJM975 rho Y12 control d1	YPD	30	D	YPD_30	YJM975YJM975	Y12	228360
23	31	YJM975YJM975 rho YJM975/Y12 G1 d127	YPD	30	D	YPD_30	YJM975YJM975	YJM975/Y12	242986
24	31	YJM975YJM975 rho YJM975/Y12 G1 d129	YPD	30	D	YPD_30	YJM975YJM975	YJM975/Y12	236364
25	31	YJM975YJM975 rho YJM975/Y12 G1 d118	YPD	30	D	YPD_30	YJM975YJM975	YJM975/Y12	226205
26	31	YJM975YJM975 rho YJM975/Y12 G1 d123	YPD	30	D	YPD_30	YJM975YJM975	YJM975/Y12	219035
27	31	YJM975YJM975 rho YJM975/Y12 G1 d106	YPD	30	D	YPD_30	YJM975YJM975	YJM975/Y12	229201
28	31	YJM975YJM975 rho YJM975/Y12 G1 d92	YPD	30	D	YPD_30	YJM975YJM975	YJM975/Y12	224315
29	31	YJM975YJM975 rho YJM975/Y12 G1 d88	YPD	30	D	YPD_30	YJM975YJM975	YJM975/Y12	212271
30	31	YJM975YJM975 rho YJM975 control d1	YPD	30	D	YPD_30	YJM975YJM975	YJM975	221519
3	32	YJM975YJM975 rho YJM975/Y12 G1 d116	YPD	30	D	YPD_30	YJM975YJM975	YJM975/Y12	195980
4	32	YJM975YJM975 rho YJM975/Y12 G1 d104	YPD	30	D	YPD_30	YJM975YJM975	YJM975/Y12	215279
5	32	YJM975YJM975 rho YJM975/Y12 G1 d105	YPD	30	D	YPD_30	YJM975YJM975	YJM975/Y12	215477
6	32	YJM975YJM975 rho Y12 control d2	YPD	30	D	YPD_30	YJM975YJM975	Y12	233784
7	32	YJM975YJM975 rho Y12 control d1	YPD	30	D	YPD_30	YJM975YJM975	Y12	246477
8	32	YJM975YJM975 rho YJM975/Y12 G1 d108	YPD	30	D	YPD_30	YJM975YJM975	YJM975/Y12	239273
9	32	YJM975YJM975 rho YJM975/Y12 G1 d124	YPD	30	D	YPD_30	YJM975YJM975	YJM975/Y12	250989
10	32	YJM975YJM975 rho YJM975/Y12 G1 d126	YPD	30	D	YPD_30	YJM975YJM975	YJM975/Y12	245908
11	32	YJM975YJM975 rho YJM975/Y12 G1 d110	YPD	30	D	YPD_30	YJM975YJM975	YJM975/Y12	245874
12	32	YJM975YJM975 rho YJM975/Y12 G1 d88	YPD	30	D	YPD_30	YJM975YJM975	YJM975/Y12	240486
13	32	YJM975YJM975 rho YJM975/Y12 G1 d98	YPD	30	D	YPD_30	YJM975YJM975	YJM975/Y12	236626
14	32	YJM975YJM975 rho YJM975/Y12 G1 d96	YPD	30	D	YPD_30	YJM975YJM975	YJM975/Y12	230693
15	32	YJM975YJM975 rho YJM975/Y12 G1 d122	YPD	30	D	YPD_30	YJM975YJM975	YJM975/Y12	245896
16	32	by	YPD	30	D	YPD_30	by	by	234061
17	32	YJM975YJM975 rho YJM975/Y12 G1 d118	YPD	30	D	YPD_30	YJM975YJM975	YJM975/Y12	241080
18	32	YJM975YJM975 rho YJM975/Y12 G1 d118	YPD	30	D	YPD_30	YJM975YJM975	YJM975/Y12	224667
19	32	YJM975YJM975 rho YJM975/Y12 G1 d104	YPD	30	D	YPD_30	YJM975YJM975	YJM975/Y12	224391
20	32	YJM975YJM975 rho YJM975/Y12 G1 d95	YPD	30	D	YPD_30	YJM975YJM975	YJM975/Y12	220566
21	32	YJM975YJM975 rho YJM975/Y12 G1 d112	YPD	30	D	YPD_30	YJM975YJM975	YJM975/Y12	222894
22	32	YJM975YJM975 rho YJM975/Y12 G1 d104	YPD	30	D	YPD_30	YJM975YJM975	YJM975/Y12	241240
23	32	by	YPD	30	D	YPD_30	by	by	207489
24	32	YJM975YJM975 rho YJM975/Y12 G1 d107	YPD	30	D	YPD_30	YJM975YJM975	YJM975/Y12	238745
25	32	YJM975YJM975 rho YJM975/Y12 G1 d105	YPD	30	D	YPD_30	YJM975YJM975	YJM975/Y12	212247
26	32	YJM975YJM975 rho YJM975/Y12 G1 d129	YPD	30	D	YPD_30	YJM975YJM975	YJM975/Y12	251545
27	32	by	YPD	30	D	YPD_30	by	by	213320
28	32	YJM975YJM975 rho YJM975/Y12 G1 d83	YPD	30	D	YPD_30	YJM975YJM975	YJM975/Y12	224864
29	32	YJM975YJM975 rho YJM975/Y12 G1 d119	YPD	30	D	YPD_30	YJM975YJM975	YJM975/Y12	213675
30	32	by	YPD	30	D	YPD_30	by	by	242259
3	33	YJM975YJM975 rho YJM975/Y12 G1 d85	YPD	30	D	YPD_30	YJM975YJM975	YJM975/Y12	218705
4	33	YJM975YJM975 rho YJM975/Y12 G1 d132	YPD	30	D	YPD_30	YJM975YJM975	YJM975/Y12	210843
5	33	YJM975YJM975 rho YJM975/Y12 G1 d102	YPD	30	D	YPD_30	YJM975YJM975	YJM975/Y12	224949
6	33	YJM975YJM975 rho YJM975/Y12 G1 d113	YPD	30	D	YPD_30	YJM975YJM975	YJM975/Y12	221736
7	33	YJM975YJM975 rho YJM975/Y12 G1 d107	YPD	30	D	YPD_30	YJM975YJM975	YJM975/Y12	231615
8	33	YJM975YJM975 rho YJM975/Y12 G1 d103	YPD	30	D	YPD_30	YJM975YJM975	YJM975/Y12	243749
9	33	YJM975YJM975 rho Y12 control d2	YPD	30	D	YPD_30	YJM975YJM975	Y12	240260
10	33	YJM975YJM975 rho YJM975/Y12 G1 d113	YPD	30	D	YPD_30	YJM975YJM975	YJM975/Y12	254643
12	33	YJM975YJM975 rho YJM975/Y12 G1 d126	YPD	30	D	YPD_30	YJM975YJM975	YJM975/Y12	237279
13	33	YJM975YJM975 rho YJM975 control d2	YPD	30	D	YPD_30	YJM975YJM975	YJM975	245157
14	33	YJM975YJM975 rho YJM975/Y12 G1 d91	YPD	30	D	YPD_30	YJM975YJM975	YJM975/Y12	235477
15	33	YJM975YJM975 rho YJM975/Y12 G1 d132	YPD	30	D	YPD_30	YJM975YJM975	YJM975/Y12	233785
16	33	YJM975YJM975 rho YJM975/Y12 G1 d127	YPD	30	D	YPD_30	YJM975YJM975	YJM975/Y12	229272
17	33	YJM975YJM975 rho YJM975/Y12 G1 d101	YPD	30	D	YPD_30	YJM975YJM975	YJM975/Y12	227898
18	33	YJM975YJM975 rho YJM975/Y12 G1 d104	YPD	30	D	YPD_30	YJM975YJM975	YJM975/Y12	230344
19	33	YJM975YJM975 rho YJM975/Y12 G1 d117	YPD	30	D	YPD_30	YJM975YJM975	YJM975/Y12	214785
20	33	YJM975YJM975 rho YJM975/Y12 G1 d123	YPD	30	D	YPD_30	YJM975YJM975	YJM975/Y12	229976
21	33	YJM975YJM975 rho YJM975/Y12 G1 d119	YPD	30	D	YPD_30	YJM975YJM975	YJM975/Y12	235614
22	33	YJM975YJM975 rho YJM975/Y12 G1 d123	YPD	30	D	YPD_30	YJM975YJM975	YJM975/Y12	234545
23	33	YJM975YJM975 rho YJM975/Y12 G1 d128	YPD	30	D	YPD_30	YJM975YJM975	YJM975/Y12	225831
24	33	YJM975YJM975 rho YJM975/Y12 G1 d95	YPD	30	D	YPD_30	YJM975YJM975	YJM975/Y12	217185
25	33	YJM975YJM975 rho YJM975/Y12 G1 d102	YPD	30	D	YPD_30	YJM975YJM975	YJM975/Y12	223256
26	33	YJM975YJM975 rho YJM975/Y12 G1 d104	YPD	30	D	YPD_30	YJM975YJM975	YJM975/Y12	243960
27	33	YJM975YJM975 rho YJM975/Y12 G1 d117	YPD	30	D	YPD_30	YJM975YJM975	YJM975/Y12	231018
28	33	YJM975YJM975 rho YJM975/Y12 G1 d94	YPD	30	D	YPD_30	YJM975YJM975	YJM975/Y12	209768
29	33	YJM975YJM975 rho YJM975/Y12 G1 d98	YPD	30	D	YPD_30	YJM975YJM975	YJM975/Y12	220123
30	33	YJM975YJM975 rho YJM975/Y12 G1 d123	YPD	30	D	YPD_30	YJM975YJM975	YJM975/Y12	217975
3	34	YJM975YJM975 rho YJM975/Y12 G1 d119	YPD	30	D	YPD_30	YJM975YJM975	YJM975/Y12	217314
4	34	by	YPD	30	D	YPD_30	by	by	232966
5	34	by	YPD	30	D	YPD_30	by	by	226457
7	34	YJM975YJM975 rho YJM975/Y12 G1 d129	YPD	30	D	YPD_30	YJM975YJM975	YJM975/Y12	239004
8	34	YJM975YJM975 rho YJM975/Y12 G1 d118	YPD	30	D	YPD_30	YJM975YJM975	YJM975/Y12	252235
9	34	YJM975YJM975 rho YJM975/Y12 G1 d119	YPD	30	D	YPD_30	YJM975YJM975	YJM975/Y12	229599
10	34	YJM975YJM975 rho YJM975/Y12 G1 d105	YPD	30	D	YPD_30	YJM975YJM975	YJM975/Y12	257788
11	34	by	YPD	30	D	YPD_30	by	by	220267
12	34	YJM975YJM975 rho YJM975/Y12 G1 d95	YPD	30	D	YPD_30	YJM975YJM975	YJM975/Y12	233061
13	34	YJM975YJM975 rho YJM975/Y12 G1 d132	YPD	30	D	YPD_30	YJM975YJM975	YJM975/Y12	229946
14	34	YJM975YJM975 rho YJM975/Y12 G1 d110	YPD	30	D	YPD_30	YJM975YJM975	YJM975/Y12	245304
15	34	YJM975YJM975 rho YJM975/Y12 G1 d116	YPD	30	D	YPD_30	YJM975YJM975	YJM975/Y12	231408
16	34	YJM975YJM975 rho YJM975/Y12 G1 d98	YPD	30	D	YPD_30	YJM975YJM975	YJM975/Y12	232557
17	34	YJM975YJM975 rho YJM975/Y12 G1 d113	YPD	30	D	YPD_30	YJM975YJM975	YJM975/Y12	232069
18	34	YJM975YJM975 rho YJM975/Y12 G1 d87	YPD	30	D	YPD_30	YJM975YJM975	YJM975/Y12	224633
19	34	YJM975YJM975 rho YJM975/Y12 G1 d122	YPD	30	D	YPD_30	YJM975YJM975	YJM975/Y12	229721
20	34	YJM975YJM975 rho YJM975/Y12 G1 d96	YPD	30	D	YPD_30	YJM975YJM975	YJM975/Y12	212591
22	34	YJM975YJM975 rho Y12 control d2	YPD	30	D	YPD_30	YJM975YJM975	Y12	222992
23	34	YJM975YJM975 rho YJM975/Y12 G1 d92	YPD	30	D	YPD_30	YJM975YJM975	YJM975/Y12	212206
24	34	YJM975YJM975 rho YJM975/Y12 G1 d116	YPD	30	D	YPD_30	YJM975YJM975	YJM975/Y12	206255
25	34	YJM975YJM975 rho YJM975/Y12 G1 d104	YPD	30	D	YPD_30	YJM975YJM975	YJM975/Y12	225352
26	34	by	YPD	30	D	YPD_30	by	by	192935
27	34	YJM975YJM975 rho YJM975/Y12 G1 d103	YPD	30	D	YPD_30	YJM975YJM975	YJM975/Y12	230954
28	34	YJM975YJM975 rho YJM975/Y12 G1 d87	YPD	30	D	YPD_30	YJM975YJM975	YJM975/Y12	217424
29	34	YJM975YJM975 rho YJM975/Y12 G1 d86	YPD	30	D	YPD_30	YJM975YJM975	YJM975/Y12	212752
30	34	YJM975YJM975 rho YJM975/Y12 G1 d118	YPD	30	D	YPD_30	YJM975YJM975	YJM975/Y12	205214
3	35	YJM975YJM975 rho YJM975/Y12 G1 d122	YPD	30	D	YPD_30	YJM975YJM975	YJM975/Y12	204978
4	35	YJM975YJM975 rho YJM975/Y12 G1 d101	YPD	30	D	YPD_30	YJM975YJM975	YJM975/Y12	220086
5	35	YJM975YJM975 rho YJM975/Y12 G1 d113	YPD	30	D	YPD_30	YJM975YJM975	YJM975/Y12	236815
6	35	YJM975YJM975 rho YJM975/Y12 G1 d98	YPD	30	D	YPD_30	YJM975YJM975	YJM975/Y12	219549
7	35	YJM975YJM975 rho YJM975/Y12 G1 d127	YPD	30	D	YPD_30	YJM975YJM975	YJM975/Y12	237157
8	35	by	YPD	30	D	YPD_30	by	by	250718
9	35	YJM975YJM975 rho YJM975/Y12 G1 d130	YPD	30	D	YPD_30	YJM975YJM975	YJM975/Y12	240720
10	35	by	YPD	30	D	YPD_30	by	by	239166
11	35	YJM975YJM975 rho YJM975/Y12 G1 d91	YPD	30	D	YPD_30	YJM975YJM975	YJM975/Y12	252495
12	35	YJM975YJM975 rho YJM975/Y12 G1 d102	YPD	30	D	YPD_30	YJM975YJM975	YJM975/Y12	239826
13	35	YJM975YJM975 rho YJM975 control d1	YPD	30	D	YPD_30	YJM975YJM975	YJM975	248272
15	35	YJM975YJM975 rho YJM975/Y12 G1 d103	YPD	30	D	YPD_30	YJM975YJM975	YJM975/Y12	229152
16	35	YJM975YJM975 rho YJM975/Y12 G1 d117	YPD	30	D	YPD_30	YJM975YJM975	YJM975/Y12	236240
17	35	by	YPD	30	D	YPD_30	by	by	208419
18	35	YJM975YJM975 rho YJM975/Y12 G1 d106	YPD	30	D	YPD_30	YJM975YJM975	YJM975/Y12	233753
19	35	YJM975YJM975 rho YJM975/Y12 G1 d83	YPD	30	D	YPD_30	YJM975YJM975	YJM975/Y12	210416
20	35	YJM975YJM975 rho YJM975 control d1	YPD	30	D	YPD_30	YJM975YJM975	YJM975	233057
21	35	YJM975YJM975 rho YJM975/Y12 G1 d130	YPD	30	D	YPD_30	YJM975YJM975	YJM975/Y12	218621
22	35	YJM975YJM975 rho YJM975 control d1	YPD	30	D	YPD_30	YJM975YJM975	YJM975	221549
23	35	YJM975YJM975 rho YJM975/Y12 G1 d85	YPD	30	D	YPD_30	YJM975YJM975	YJM975/Y12	226374
24	35	YJM975YJM975 rho YJM975/Y12 G1 d127	YPD	30	D	YPD_30	YJM975YJM975	YJM975/Y12	220830
25	35	YJM975YJM975 rho YJM975/Y12 G1 d89	YPD	30	D	YPD_30	YJM975YJM975	YJM975/Y12	209928
26	35	YJM975YJM975 rho YJM975/Y12 G1 d116	YPD	30	D	YPD_30	YJM975YJM975	YJM975/Y12	230517
27	35	YJM975YJM975 rho YJM975/Y12 G1 d103	YPD	30	D	YPD_30	YJM975YJM975	YJM975/Y12	211279
28	35	YJM975YJM975 rho YJM975/Y12 G1 d86	YPD	30	D	YPD_30	YJM975YJM975	YJM975/Y12	219815
29	35	YJM975YJM975 rho YJM975/Y12 G1 d101	YPD	30	D	YPD_30	YJM975YJM975	YJM975/Y12	205329
30	35	YJM975YJM975 rho YJM975/Y12 G1 d116	YPD	30	D	YPD_30	YJM975YJM975	YJM975/Y12	204511
3	36	YJM975YJM975 rho YJM975/Y12 G1 d126	YPD	30	D	YPD_30	YJM975YJM975	YJM975/Y12	199786
4	36	YJM975YJM975 rho YJM975/Y12 G1 d89	YPD	30	D	YPD_30	YJM975YJM975	YJM975/Y12	210235
5	36	YJM975YJM975 rho YJM975/Y12 G1 d107	YPD	30	D	YPD_30	YJM975YJM975	YJM975/Y12	210948
6	36	YJM975YJM975 rho YJM975/Y12 G1 d85	YPD	30	D	YPD_30	YJM975YJM975	YJM975/Y12	236086
7	36	by	YPD	30	D	YPD_30	by	by	202134
8	36	YJM975YJM975 rho YJM975/Y12 G1 d83	YPD	30	D	YPD_30	YJM975YJM975	YJM975/Y12	247911
9	36	YJM975YJM975 rho YJM975/Y12 G1 d86	YPD	30	D	YPD_30	YJM975YJM975	YJM975/Y12	230820
10	36	YJM975YJM975 rho YJM975/Y12 G1 d130	YPD	30	D	YPD_30	YJM975YJM975	YJM975/Y12	235291
11	36	YJM975YJM975 rho YJM975/Y12 G1 d87	YPD	30	D	YPD_30	YJM975YJM975	YJM975/Y12	235913
12	36	YJM975YJM975 rho YJM975/Y12 G1 d98	YPD	30	D	YPD_30	YJM975YJM975	YJM975/Y12	235681
13	36	YJM975YJM975 rho YJM975/Y12 G1 d97	YPD	30	D	YPD_30	YJM975YJM975	YJM975/Y12	232467
14	36	YJM975YJM975 rho YJM975/Y12 G1 d124	YPD	30	D	YPD_30	YJM975YJM975	YJM975/Y12	221167
15	36	YJM975YJM975 rho YJM975/Y12 G1 d117	YPD	30	D	YPD_30	YJM975YJM975	YJM975/Y12	237288
16	36	YJM975YJM975 rho YJM975/Y12 G1 d91	YPD	30	D	YPD_30	YJM975YJM975	YJM975/Y12	225953
17	36	YJM975YJM975 rho YJM975/Y12 G1 d112	YPD	30	D	YPD_30	YJM975YJM975	YJM975/Y12	225570
18	36	YJM975YJM975 rho YJM975/Y12 G1 d126	YPD	30	D	YPD_30	YJM975YJM975	YJM975/Y12	210658
19	36	YJM975YJM975 rho YJM975/Y12 G1 d106	YPD	30	D	YPD_30	YJM975YJM975	YJM975/Y12	233092
20	36	YJM975YJM975 rho YJM975/Y12 G1 d94	YPD	30	D	YPD_30	YJM975YJM975	YJM975/Y12	208372
21	36	YJM975YJM975 rho YJM975/Y12 G1 d94	YPD	30	D	YPD_30	YJM975YJM975	YJM975/Y12	220780
22	36	YJM975YJM975 rho YJM975/Y12 G1 d132	YPD	30	D	YPD_30	YJM975YJM975	YJM975/Y12	209617
23	36	YJM975YJM975 rho YJM975/Y12 G1 d108	YPD	30	D	YPD_30	YJM975YJM975	YJM975/Y12	202892
24	36	YJM975YJM975 rho YJM975/Y12 G1 d130	YPD	30	D	YPD_30	YJM975YJM975	YJM975/Y12	233296
25	36	YJM975YJM975 rho YJM975/Y12 G1 d103	YPD	30	D	YPD_30	YJM975YJM975	YJM975/Y12	211870
26	36	YJM975YJM975 rho YJM975/Y12 G1 d123	YPD	30	D	YPD_30	YJM975YJM975	YJM975/Y12	208061
27	36	YJM975YJM975 rho YJM975/Y12 G1 d127	YPD	30	D	YPD_30	YJM975YJM975	YJM975/Y12	216863
28	36	YJM975YJM975 rho YJM975/Y12 G1 d114	YPD	30	D	YPD_30	YJM975YJM975	YJM975/Y12	212727
29	36	YJM975YJM975 rho YJM975/Y12 G1 d123	YPD	30	D	YPD_30	YJM975YJM975	YJM975/Y12	205808
30	36	YJM975YJM975 rho YJM975/Y12 G1 d106	YPD	30	D	YPD_30	YJM975YJM975	YJM975/Y12	209473
3	37	YJM975YJM975 rho YJM975/Y12 G1 d130	YPD	30	D	YPD_30	YJM975YJM975	YJM975/Y12	201464
4	37	by	YPD	30	D	YPD_30	by	by	220010
5	37	YJM975YJM975 rho YJM975/Y12 G1 d102	YPD	30	D	YPD_30	YJM975YJM975	YJM975/Y12	225796
6	37	YJM975YJM975 rho YJM975/Y12 G1 d104	YPD	30	D	YPD_30	YJM975YJM975	YJM975/Y12	220846
7	37	YJM975YJM975 rho YJM975/Y12 G1 d95	YPD	30	D	YPD_30	YJM975YJM975	YJM975/Y12	234335
8	37	YJM975YJM975 rho Y12 control d2	YPD	30	D	YPD_30	YJM975YJM975	Y12	233700
9	37	YJM975YJM975 rho YJM975/Y12 G1 d122	YPD	30	D	YPD_30	YJM975YJM975	YJM975/Y12	241223
10	37	YJM975YJM975 rho YJM975/Y12 G1 d128	YPD	30	D	YPD_30	YJM975YJM975	YJM975/Y12	243488
11	37	YJM975YJM975 rho YJM975/Y12 G1 d103	YPD	30	D	YPD_30	YJM975YJM975	YJM975/Y12	230845
13	37	YJM975YJM975 rho Y12 control d1	YPD	30	D	YPD_30	YJM975YJM975	Y12	234587
14	37	YJM975YJM975 rho YJM975/Y12 G1 d122	YPD	30	D	YPD_30	YJM975YJM975	YJM975/Y12	235369
15	37	by	YPD	30	D	YPD_30	by	by	217242
16	37	YJM975YJM975 rho YJM975/Y12 G1 d108	YPD	30	D	YPD_30	YJM975YJM975	YJM975/Y12	230881
17	37	YJM975YJM975 rho YJM975/Y12 G1 d109	YPD	30	D	YPD_30	YJM975YJM975	YJM975/Y12	230054
18	37	YJM975YJM975 rho YJM975/Y12 G1 d128	YPD	30	D	YPD_30	YJM975YJM975	YJM975/Y12	224942
19	37	by	YPD	30	D	YPD_30	by	by	193578
20	37	YJM975YJM975 rho YJM975/Y12 G1 d105	YPD	30	D	YPD_30	YJM975YJM975	YJM975/Y12	216246
21	37	YJM975YJM975 rho YJM975 control d1	YPD	30	D	YPD_30	YJM975YJM975	YJM975	210897
22	37	YJM975YJM975 rho YJM975/Y12 G1 d128	YPD	30	D	YPD_30	YJM975YJM975	YJM975/Y12	218051
23	37	YJM975YJM975 rho YJM975/Y12 G1 d126	YPD	30	D	YPD_30	YJM975YJM975	YJM975/Y12	216593
24	37	by	YPD	30	D	YPD_30	by	by	190629
25	37	YJM975YJM975 rho YJM975/Y12 G1 d98	YPD	30	D	YPD_30	YJM975YJM975	YJM975/Y12	221794
26	37	YJM975YJM975 rho YJM975/Y12 G1 d103	YPD	30	D	YPD_30	YJM975YJM975	YJM975/Y12	207207
27	37	YJM975YJM975 rho YJM975/Y12 G1 d102	YPD	30	D	YPD_30	YJM975YJM975	YJM975/Y12	210808
28	37	YJM975YJM975 rho YJM975/Y12 G1 d129	YPD	30	D	YPD_30	YJM975YJM975	YJM975/Y12	200458
29	37	YJM975YJM975 rho YJM975/Y12 G1 d91	YPD	30	D	YPD_30	YJM975YJM975	YJM975/Y12	214167
30	37	by	YPD	30	D	YPD_30	by	by	229564
3	38	YJM975YJM975 rho YJM975/Y12 G1 d90	YPD	30	D	YPD_30	YJM975YJM975	YJM975/Y12	195247
4	38	YJM975YJM975 rho YJM975/Y12 G1 d107	YPD	30	D	YPD_30	YJM975YJM975	YJM975/Y12	211113
5	38	YJM975YJM975 rho YJM975/Y12 G1 d127	YPD	30	D	YPD_30	YJM975YJM975	YJM975/Y12	216227
6	38	YJM975YJM975 rho YJM975/Y12 G1 d98	YPD	30	D	YPD_30	YJM975YJM975	YJM975/Y12	210322
7	38	YJM975YJM975 rho Y12 control d2	YPD	30	D	YPD_30	YJM975YJM975	Y12	224267
8	38	YJM975YJM975 rho YJM975/Y12 G1 d117	YPD	30	D	YPD_30	YJM975YJM975	YJM975/Y12	241089
9	38	YJM975YJM975 rho YJM975/Y12 G1 d104	YPD	30	D	YPD_30	YJM975YJM975	YJM975/Y12	234850
10	38	by	YPD	30	D	YPD_30	by	by	228224
11	38	YJM975YJM975 rho YJM975/Y12 G1 d92	YPD	30	D	YPD_30	YJM975YJM975	YJM975/Y12	238173
12	38	YJM975YJM975 rho YJM975/Y12 G1 d117	YPD	30	D	YPD_30	YJM975YJM975	YJM975/Y12	243459
13	38	YJM975YJM975 rho YJM975/Y12 G1 d128	YPD	30	D	YPD_30	YJM975YJM975	YJM975/Y12	246056
14	38	YJM975YJM975 rho YJM975/Y12 G1 d91	YPD	30	D	YPD_30	YJM975YJM975	YJM975/Y12	228198
15	38	YJM975YJM975 rho YJM975/Y12 G1 d101	YPD	30	D	YPD_30	YJM975YJM975	YJM975/Y12	233265
16	38	YJM975YJM975 rho YJM975/Y12 G1 d89	YPD	30	D	YPD_30	YJM975YJM975	YJM975/Y12	219941
17	38	YJM975YJM975 rho YJM975/Y12 G1 d122	YPD	30	D	YPD_30	YJM975YJM975	YJM975/Y12	216457
18	38	YJM975YJM975 rho YJM975/Y12 G1 d94	YPD	30	D	YPD_30	YJM975YJM975	YJM975/Y12	238616
20	38	YJM975YJM975 rho YJM975 control d2	YPD	30	D	YPD_30	YJM975YJM975	YJM975	235910
21	38	YJM975YJM975 rho YJM975/Y12 G1 d90	YPD	30	D	YPD_30	YJM975YJM975	YJM975/Y12	206297
22	38	YJM975YJM975 rho YJM975/Y12 G1 d97	YPD	30	D	YPD_30	YJM975YJM975	YJM975/Y12	193930
23	38	YJM975YJM975 rho YJM975/Y12 G1 d127	YPD	30	D	YPD_30	YJM975YJM975	YJM975/Y12	209249
24	38	YJM975YJM975 rho YJM975/Y12 G1 d129	YPD	30	D	YPD_30	YJM975YJM975	YJM975/Y12	217160
25	38	YJM975YJM975 rho YJM975/Y12 G1 d96	YPD	30	D	YPD_30	YJM975YJM975	YJM975/Y12	218703
26	38	YJM975YJM975 rho YJM975/Y12 G1 d106	YPD	30	D	YPD_30	YJM975YJM975	YJM975/Y12	207944
27	38	YJM975YJM975 rho YJM975/Y12 G1 d103	YPD	30	D	YPD_30	YJM975YJM975	YJM975/Y12	201910
28	38	YJM975YJM975 rho YJM975/Y12 G1 d89	YPD	30	D	YPD_30	YJM975YJM975	YJM975/Y12	203658
29	38	YJM975YJM975 rho YJM975/Y12 G1 d117	YPD	30	D	YPD_30	YJM975YJM975	YJM975/Y12	198169
30	38	YJM975YJM975 rho YJM975/Y12 G1 d104	YPD	30	D	YPD_30	YJM975YJM975	YJM975/Y12	205156
3	39	YJM975YJM975 rho YJM975/Y12 G1 d101	YPD	30	D	YPD_30	YJM975YJM975	YJM975/Y12	198929
4	39	YJM975YJM975 rho YJM975/Y12 G1 d103	YPD	30	D	YPD_30	YJM975YJM975	YJM975/Y12	200656
5	39	YJM975YJM975 rho YJM975/Y12 G1 d119	YPD	30	D	YPD_30	YJM975YJM975	YJM975/Y12	228048
6	39	YJM975YJM975 rho YJM975/Y12 G1 d91	YPD	30	D	YPD_30	YJM975YJM975	YJM975/Y12	218284
7	39	YJM975YJM975 rho YJM975/Y12 G1 d105	YPD	30	D	YPD_30	YJM975YJM975	YJM975/Y12	221308
8	39	YJM975YJM975 rho Y12 control d1	YPD	30	D	YPD_30	YJM975YJM975	Y12	237823
9	39	YJM975YJM975 rho YJM975/Y12 G1 d108	YPD	30	D	YPD_30	YJM975YJM975	YJM975/Y12	231828
10	39	YJM975YJM975 rho YJM975/Y12 G1 d129	YPD	30	D	YPD_30	YJM975YJM975	YJM975/Y12	240227
11	39	YJM975YJM975 rho YJM975/Y12 G1 d92	YPD	30	D	YPD_30	YJM975YJM975	YJM975/Y12	235726
12	39	YJM975YJM975 rho YJM975/Y12 G1 d117	YPD	30	D	YPD_30	YJM975YJM975	YJM975/Y12	224927
13	39	YJM975YJM975 rho YJM975/Y12 G1 d112	YPD	30	D	YPD_30	YJM975YJM975	YJM975/Y12	235890
14	39	by	YPD	30	D	YPD_30	by	by	211570
15	39	YJM975YJM975 rho YJM975/Y12 G1 d108	YPD	30	D	YPD_30	YJM975YJM975	YJM975/Y12	231161
17	39	YJM975YJM975 rho YJM975/Y12 G1 d98	YPD	30	D	YPD_30	YJM975YJM975	YJM975/Y12	212169
18	39	YJM975YJM975 rho YJM975/Y12 G1 d100	YPD	30	D	YPD_30	YJM975YJM975	YJM975/Y12	231851
19	39	YJM975YJM975 rho YJM975/Y12 G1 d110	YPD	30	D	YPD_30	YJM975YJM975	YJM975/Y12	229713
20	39	YJM975YJM975 rho YJM975/Y12 G1 d115	YPD	30	D	YPD_30	YJM975YJM975	YJM975/Y12	216734
21	39	YJM975YJM975 rho YJM975/Y12 G1 d89	YPD	30	D	YPD_30	YJM975YJM975	YJM975/Y12	214326
22	39	YJM975YJM975 rho YJM975/Y12 G1 d128	YPD	30	D	YPD_30	YJM975YJM975	YJM975/Y12	209402
23	39	YJM975YJM975 rho YJM975/Y12 G1 d94	YPD	30	D	YPD_30	YJM975YJM975	YJM975/Y12	216261
24	39	YJM975YJM975 rho YJM975/Y12 G1 d132	YPD	30	D	YPD_30	YJM975YJM975	YJM975/Y12	196892
25	39	YJM975YJM975 rho YJM975/Y12 G1 d85	YPD	30	D	YPD_30	YJM975YJM975	YJM975/Y12	209479
26	39	YJM975YJM975 rho YJM975/Y12 G1 d83	YPD	30	D	YPD_30	YJM975YJM975	YJM975/Y12	215487
27	39	YJM975YJM975 rho YJM975/Y12 G1 d94	YPD	30	D	YPD_30	YJM975YJM975	YJM975/Y12	209116
28	39	YJM975YJM975 rho YJM975/Y12 G1 d116	YPD	30	D	YPD_30	YJM975YJM975	YJM975/Y12	198219
30	39	YJM975YJM975 rho YJM975/Y12 G1 d127	YPD	30	D	YPD_30	YJM975YJM975	YJM975/Y12	203166
3	40	YJM975YJM975 rho YJM975/Y12 G1 d104	YPD	30	D	YPD_30	YJM975YJM975	YJM975/Y12	207039
4	40	YJM975YJM975 rho YJM975/Y12 G1 d103	YPD	30	D	YPD_30	YJM975YJM975	YJM975/Y12	205040
5	40	YJM975YJM975 rho YJM975/Y12 G1 d90	YPD	30	D	YPD_30	YJM975YJM975	YJM975/Y12	201419
6	40	YJM975YJM975 rho YJM975/Y12 G1 d124	YPD	30	D	YPD_30	YJM975YJM975	YJM975/Y12	233400
7	40	YJM975YJM975 rho YJM975 control d2	YPD	30	D	YPD_30	YJM975YJM975	YJM975	234245
8	40	YJM975YJM975 rho YJM975/Y12 G1 d101	YPD	30	D	YPD_30	YJM975YJM975	YJM975/Y12	235922
9	40	YJM975YJM975 rho YJM975/Y12 G1 d115	YPD	30	D	YPD_30	YJM975YJM975	YJM975/Y12	235884
10	40	YJM975YJM975 rho YJM975/Y12 G1 d97	YPD	30	D	YPD_30	YJM975YJM975	YJM975/Y12	239717
11	40	YJM975YJM975 rho YJM975/Y12 G1 d127	YPD	30	D	YPD_30	YJM975YJM975	YJM975/Y12	245344
12	40	YJM975YJM975 rho YJM975/Y12 G1 d117	YPD	30	D	YPD_30	YJM975YJM975	YJM975/Y12	240737
13	40	YJM975YJM975 rho YJM975/Y12 G1 d110	YPD	30	D	YPD_30	YJM975YJM975	YJM975/Y12	245486
14	40	YJM975YJM975 rho YJM975/Y12 G1 d103	YPD	30	D	YPD_30	YJM975YJM975	YJM975/Y12	248164
15	40	YJM975YJM975 rho YJM975/Y12 G1 d118	YPD	30	D	YPD_30	YJM975YJM975	YJM975/Y12	244559
16	40	YJM975YJM975 rho YJM975/Y12 G1 d116	YPD	30	D	YPD_30	YJM975YJM975	YJM975/Y12	237392
17	40	YJM975YJM975 rho YJM975/Y12 G1 d123	YPD	30	D	YPD_30	YJM975YJM975	YJM975/Y12	239136
18	40	YJM975YJM975 rho YJM975/Y12 G1 d98	YPD	30	D	YPD_30	YJM975YJM975	YJM975/Y12	205793
19	40	YJM975YJM975 rho YJM975/Y12 G1 d106	YPD	30	D	YPD_30	YJM975YJM975	YJM975/Y12	227247
20	40	YJM975YJM975 rho YJM975/Y12 G1 d132	YPD	30	D	YPD_30	YJM975YJM975	YJM975/Y12	216482
21	40	YJM975YJM975 rho YJM975 control d1	YPD	30	D	YPD_30	YJM975YJM975	YJM975	207902
22	40	YJM975YJM975 rho YJM975/Y12 G1 d127	YPD	30	D	YPD_30	YJM975YJM975	YJM975/Y12	210618
23	40	YJM975YJM975 rho YJM975/Y12 G1 d114	YPD	30	D	YPD_30	YJM975YJM975	YJM975/Y12	208961
24	40	YJM975YJM975 rho YJM975/Y12 G1 d106	YPD	30	D	YPD_30	YJM975YJM975	YJM975/Y12	202799
25	40	YJM975YJM975 rho YJM975/Y12 G1 d130	YPD	30	D	YPD_30	YJM975YJM975	YJM975/Y12	219284
26	40	by	YPD	30	D	YPD_30	by	by	212491
27	40	YJM975YJM975 rho YJM975/Y12 G1 d88	YPD	30	D	YPD_30	YJM975YJM975	YJM975/Y12	218434
28	40	YJM975YJM975 rho YJM975/Y12 G1 d116	YPD	30	D	YPD_30	YJM975YJM975	YJM975/Y12	202448
29	40	YJM975YJM975 rho YJM975/Y12 G1 d102	YPD	30	D	YPD_30	YJM975YJM975	YJM975/Y12	197180
30	40	YJM975YJM975 rho YJM975/Y12 G1 d91	YPD	30	D	YPD_30	YJM975YJM975	YJM975/Y12	195626
3	41	YJM975YJM975 rho YJM975/Y12 G1 d128	YPD	30	D	YPD_30	YJM975YJM975	YJM975/Y12	210887
4	41	YJM975YJM975 rho YJM975/Y12 G1 d128	YPD	30	D	YPD_30	YJM975YJM975	YJM975/Y12	203456
5	41	YJM975YJM975 rho YJM975/Y12 G1 d95	YPD	30	D	YPD_30	YJM975YJM975	YJM975/Y12	209027
6	41	YJM975YJM975 rho YJM975/Y12 G1 d97	YPD	30	D	YPD_30	YJM975YJM975	YJM975/Y12	233160
7	41	YJM975YJM975 rho YJM975/Y12 G1 d113	YPD	30	D	YPD_30	YJM975YJM975	YJM975/Y12	245907
8	41	YJM975YJM975 rho YJM975/Y12 G1 d90	YPD	30	D	YPD_30	YJM975YJM975	YJM975/Y12	239412
9	41	YJM975YJM975 rho YJM975/Y12 G1 d117	YPD	30	D	YPD_30	YJM975YJM975	YJM975/Y12	243611
10	41	YJM975YJM975 rho YJM975/Y12 G1 d98	YPD	30	D	YPD_30	YJM975YJM975	YJM975/Y12	224173
11	41	YJM975YJM975 rho YJM975/Y12 G1 d88	YPD	30	D	YPD_30	YJM975YJM975	YJM975/Y12	227656
12	41	YJM975YJM975 rho YJM975/Y12 G1 d124	YPD	30	D	YPD_30	YJM975YJM975	YJM975/Y12	230966
14	41	YJM975YJM975 rho YJM975/Y12 G1 d89	YPD	30	D	YPD_30	YJM975YJM975	YJM975/Y12	239163
16	41	YJM975YJM975 rho YJM975/Y12 G1 d102	YPD	30	D	YPD_30	YJM975YJM975	YJM975/Y12	244369
17	41	by	YPD	30	D	YPD_30	by	by	222546
18	41	YJM975YJM975 rho YJM975/Y12 G1 d100	YPD	30	D	YPD_30	YJM975YJM975	YJM975/Y12	224362
19	41	YJM975YJM975 rho Y12 control d1	YPD	30	D	YPD_30	YJM975YJM975	Y12	215129
20	41	YJM975YJM975 rho YJM975/Y12 G1 d105	YPD	30	D	YPD_30	YJM975YJM975	YJM975/Y12	204519
21	41	YJM975YJM975 rho YJM975/Y12 G1 d110	YPD	30	D	YPD_30	YJM975YJM975	YJM975/Y12	214479
22	41	YJM975YJM975 rho YJM975/Y12 G1 d108	YPD	30	D	YPD_30	YJM975YJM975	YJM975/Y12	205155
23	41	YJM975YJM975 rho YJM975/Y12 G1 d127	YPD	30	D	YPD_30	YJM975YJM975	YJM975/Y12	195135
24	41	YJM975YJM975 rho YJM975/Y12 G1 d86	YPD	30	D	YPD_30	YJM975YJM975	YJM975/Y12	211276
25	41	YJM975YJM975 rho YJM975/Y12 G1 d90	YPD	30	D	YPD_30	YJM975YJM975	YJM975/Y12	209653
26	41	by	YPD	30	D	YPD_30	by	by	208261
27	41	YJM975YJM975 rho YJM975/Y12 G1 d106	YPD	30	D	YPD_30	YJM975YJM975	YJM975/Y12	203572
28	41	YJM975YJM975 rho YJM975 control d2	YPD	30	D	YPD_30	YJM975YJM975	YJM975	257848
29	41	YJM975YJM975 rho YJM975/Y12 G1 d128	YPD	30	D	YPD_30	YJM975YJM975	YJM975/Y12	188111
30	41	YJM975YJM975 rho YJM975/Y12 G1 d126	YPD	30	D	YPD_30	YJM975YJM975	YJM975/Y12	188063
4	42	by	YPD	30	D	YPD_30	by	by	212638
5	42	YJM975YJM975 rho YJM975/Y12 G1 d83	YPD	30	D	YPD_30	YJM975YJM975	YJM975/Y12	224512
6	42	YJM975YJM975 rho YJM975/Y12 G1 d89	YPD	30	D	YPD_30	YJM975YJM975	YJM975/Y12	223512
7	42	YJM975YJM975 rho YJM975/Y12 G1 d119	YPD	30	D	YPD_30	YJM975YJM975	YJM975/Y12	234895
8	42	YJM975YJM975 rho YJM975/Y12 G1 d124	YPD	30	D	YPD_30	YJM975YJM975	YJM975/Y12	242987
9	42	by	YPD	30	D	YPD_30	by	by	224556
10	42	YJM975YJM975 rho YJM975/Y12 G1 d127	YPD	30	D	YPD_30	YJM975YJM975	YJM975/Y12	259984
11	42	YJM975YJM975 rho YJM975/Y12 G1 d89	YPD	30	D	YPD_30	YJM975YJM975	YJM975/Y12	234896
12	42	YJM975YJM975 rho YJM975/Y12 G1 d129	YPD	30	D	YPD_30	YJM975YJM975	YJM975/Y12	238415
13	42	YJM975YJM975 rho YJM975/Y12 G1 d132	YPD	30	D	YPD_30	YJM975YJM975	YJM975/Y12	239335
14	42	YJM975YJM975 rho YJM975/Y12 G1 d83	YPD	30	D	YPD_30	YJM975YJM975	YJM975/Y12	254606
15	42	YJM975YJM975 rho YJM975/Y12 G1 d89	YPD	30	D	YPD_30	YJM975YJM975	YJM975/Y12	235454
16	42	YJM975YJM975 rho YJM975/Y12 G1 d108	YPD	30	D	YPD_30	YJM975YJM975	YJM975/Y12	235543
17	42	YJM975YJM975 rho YJM975/Y12 G1 d127	YPD	30	D	YPD_30	YJM975YJM975	YJM975/Y12	225213
18	42	YJM975YJM975 rho YJM975/Y12 G1 d123	YPD	30	D	YPD_30	YJM975YJM975	YJM975/Y12	244169
19	42	YJM975YJM975 rho YJM975/Y12 G1 d109	YPD	30	D	YPD_30	YJM975YJM975	YJM975/Y12	215062
20	42	YJM975YJM975 rho YJM975 control d1	YPD	30	D	YPD_30	YJM975YJM975	YJM975	218709
21	42	YJM975YJM975 rho YJM975/Y12 G1 d96	YPD	30	D	YPD_30	YJM975YJM975	YJM975/Y12	204424
22	42	YJM975YJM975 rho YJM975/Y12 G1 d105	YPD	30	D	YPD_30	YJM975YJM975	YJM975/Y12	204636
23	42	YJM975YJM975 rho YJM975/Y12 G1 d94	YPD	30	D	YPD_30	YJM975YJM975	YJM975/Y12	220037
24	42	by	YPD	30	D	YPD_30	by	by	208551
25	42	YJM975YJM975 rho YJM975/Y12 G1 d103	YPD	30	D	YPD_30	YJM975YJM975	YJM975/Y12	208210
26	42	YJM975YJM975 rho YJM975/Y12 G1 d129	YPD	30	D	YPD_30	YJM975YJM975	YJM975/Y12	212469
27	42	YJM975YJM975 rho YJM975/Y12 G1 d127	YPD	30	D	YPD_30	YJM975YJM975	YJM975/Y12	205681
28	42	YJM975YJM975 rho YJM975/Y12 G1 d95	YPD	30	D	YPD_30	YJM975YJM975	YJM975/Y12	234008
29	42	YJM975YJM975 rho YJM975/Y12 G1 d88	YPD	30	D	YPD_30	YJM975YJM975	YJM975/Y12	183024
30	42	YJM975YJM975 rho YJM975 control d2	YPD	30	D	YPD_30	YJM975YJM975	YJM975	189956
3	43	YJM975YJM975 rho YJM975/Y12 G1 d95	YPD	30	D	YPD_30	YJM975YJM975	YJM975/Y12	197057
4	43	YJM975YJM975 rho YJM975/Y12 G1 d85	YPD	30	D	YPD_30	YJM975YJM975	YJM975/Y12	207814
5	43	YJM975YJM975 rho YJM975/Y12 G1 d126	YPD	30	D	YPD_30	YJM975YJM975	YJM975/Y12	218383
6	43	YJM975YJM975 rho YJM975/Y12 G1 d106	YPD	30	D	YPD_30	YJM975YJM975	YJM975/Y12	211453
7	43	YJM975YJM975 rho YJM975/Y12 G1 d92	YPD	30	D	YPD_30	YJM975YJM975	YJM975/Y12	228000
8	43	YJM975YJM975 rho YJM975 control d2	YPD	30	D	YPD_30	YJM975YJM975	YJM975	234382
9	43	YJM975YJM975 rho YJM975/Y12 G1 d97	YPD	30	D	YPD_30	YJM975YJM975	YJM975/Y12	240800
10	43	YJM975YJM975 rho YJM975/Y12 G1 d106	YPD	30	D	YPD_30	YJM975YJM975	YJM975/Y12	235497
11	43	YJM975YJM975 rho YJM975/Y12 G1 d85	YPD	30	D	YPD_30	YJM975YJM975	YJM975/Y12	233620
12	43	YJM975YJM975 rho YJM975/Y12 G1 d89	YPD	30	D	YPD_30	YJM975YJM975	YJM975/Y12	245287
13	43	YJM975YJM975 rho YJM975/Y12 G1 d115	YPD	30	D	YPD_30	YJM975YJM975	YJM975/Y12	247838
14	43	YJM975YJM975 rho YJM975/Y12 G1 d103	YPD	30	D	YPD_30	YJM975YJM975	YJM975/Y12	235797
15	43	YJM975YJM975 rho YJM975/Y12 G1 d107	YPD	30	D	YPD_30	YJM975YJM975	YJM975/Y12	231131
16	43	YJM975YJM975 rho YJM975/Y12 G1 d124	YPD	30	D	YPD_30	YJM975YJM975	YJM975/Y12	232459
17	43	YJM975YJM975 rho Y12 control d2	YPD	30	D	YPD_30	YJM975YJM975	Y12	244950
18	43	by	YPD	30	D	YPD_30	by	by	215082
19	43	YJM975YJM975 rho YJM975/Y12 G1 d128	YPD	30	D	YPD_30	YJM975YJM975	YJM975/Y12	275441
20	43	YJM975YJM975 rho YJM975/Y12 G1 d104	YPD	30	D	YPD_30	YJM975YJM975	YJM975/Y12	206239
21	43	YJM975YJM975 rho YJM975/Y12 G1 d124	YPD	30	D	YPD_30	YJM975YJM975	YJM975/Y12	201961
22	43	YJM975YJM975 rho YJM975 control d1	YPD	30	D	YPD_30	YJM975YJM975	YJM975	213177
23	43	YJM975YJM975 rho YJM975/Y12 G1 d90	YPD	30	D	YPD_30	YJM975YJM975	YJM975/Y12	210037
24	43	YJM975YJM975 rho YJM975/Y12 G1 d95	YPD	30	D	YPD_30	YJM975YJM975	YJM975/Y12	213263
25	43	YJM975YJM975 rho YJM975/Y12 G1 d106	YPD	30	D	YPD_30	YJM975YJM975	YJM975/Y12	201682
26	43	YJM975YJM975 rho YJM975/Y12 G1 d119	YPD	30	D	YPD_30	YJM975YJM975	YJM975/Y12	200799
27	43	YJM975YJM975 rho YJM975/Y12 G1 d83	YPD	30	D	YPD_30	YJM975YJM975	YJM975/Y12	202400
28	43	YJM975YJM975 rho YJM975/Y12 G1 d98	YPD	30	D	YPD_30	YJM975YJM975	YJM975/Y12	187789
29	43	YJM975YJM975 rho YJM975/Y12 G1 d112	YPD	30	D	YPD_30	YJM975YJM975	YJM975/Y12	180953
30	43	YJM975YJM975 rho YJM975/Y12 G1 d102	YPD	30	D	YPD_30	YJM975YJM975	YJM975/Y12	217734
3	44	YJM975YJM975 rho YJM975/Y12 G1 d100	YPD	30	D	YPD_30	YJM975YJM975	YJM975/Y12	193814
4	44	YJM975YJM975 rho YJM975/Y12 G1 d110	YPD	30	D	YPD_30	YJM975YJM975	YJM975/Y12	204427
5	44	YJM975YJM975 rho YJM975/Y12 G1 d110	YPD	30	D	YPD_30	YJM975YJM975	YJM975/Y12	210086
6	44	YJM975YJM975 rho YJM975/Y12 G1 d109	YPD	30	D	YPD_30	YJM975YJM975	YJM975/Y12	229545
7	44	by	YPD	30	D	YPD_30	by	by	235661
8	44	YJM975YJM975 rho YJM975/Y12 G1 d90	YPD	30	D	YPD_30	YJM975YJM975	YJM975/Y12	231735
9	44	YJM975YJM975 rho YJM975/Y12 G1 d118	YPD	30	D	YPD_30	YJM975YJM975	YJM975/Y12	225102
10	44	YJM975YJM975 rho YJM975/Y12 G1 d114	YPD	30	D	YPD_30	YJM975YJM975	YJM975/Y12	229040
11	44	YJM975YJM975 rho YJM975/Y12 G1 d98	YPD	30	D	YPD_30	YJM975YJM975	YJM975/Y12	230399
12	44	YJM975YJM975 rho YJM975/Y12 G1 d126	YPD	30	D	YPD_30	YJM975YJM975	YJM975/Y12	224757
13	44	YJM975YJM975 rho YJM975/Y12 G1 d129	YPD	30	D	YPD_30	YJM975YJM975	YJM975/Y12	247385
14	44	YJM975YJM975 rho YJM975/Y12 G1 d113	YPD	30	D	YPD_30	YJM975YJM975	YJM975/Y12	254540
15	44	YJM975YJM975 rho YJM975/Y12 G1 d124	YPD	30	D	YPD_30	YJM975YJM975	YJM975/Y12	224889
16	44	YJM975YJM975 rho YJM975/Y12 G1 d123	YPD	30	D	YPD_30	YJM975YJM975	YJM975/Y12	234007
17	44	YJM975YJM975 rho YJM975/Y12 G1 d124	YPD	30	D	YPD_30	YJM975YJM975	YJM975/Y12	245592
18	44	by	YPD	30	D	YPD_30	by	by	224161
19	44	YJM975YJM975 rho YJM975/Y12 G1 d92	YPD	30	D	YPD_30	YJM975YJM975	YJM975/Y12	217256
20	44	YJM975YJM975 rho YJM975/Y12 G1 d132	YPD	30	D	YPD_30	YJM975YJM975	YJM975/Y12	217360
21	44	YJM975YJM975 rho YJM975/Y12 G1 d97	YPD	30	D	YPD_30	YJM975YJM975	YJM975/Y12	215632
22	44	YJM975YJM975 rho YJM975/Y12 G1 d110	YPD	30	D	YPD_30	YJM975YJM975	YJM975/Y12	255749
23	44	YJM975YJM975 rho YJM975/Y12 G1 d91	YPD	30	D	YPD_30	YJM975YJM975	YJM975/Y12	270440
24	44	YJM975YJM975 rho YJM975/Y12 G1 d117	YPD	30	D	YPD_30	YJM975YJM975	YJM975/Y12	204923
25	44	YJM975YJM975 rho Y12 control d1	YPD	30	D	YPD_30	YJM975YJM975	Y12	206904
26	44	YJM975YJM975 rho YJM975/Y12 G1 d85	YPD	30	D	YPD_30	YJM975YJM975	YJM975/Y12	205207
27	44	YJM975YJM975 rho YJM975/Y12 G1 d102	YPD	30	D	YPD_30	YJM975YJM975	YJM975/Y12	195597
28	44	YJM975YJM975 rho Y12 control d1	YPD	30	D	YPD_30	YJM975YJM975	Y12	194403
29	44	YJM975YJM975 rho YJM975/Y12 G1 d94	YPD	30	D	YPD_30	YJM975YJM975	YJM975/Y12	187693
30	44	YJM975YJM975 rho YJM975 control d2	YPD	30	D	YPD_30	YJM975YJM975	YJM975	191103
3	45	YJM975YJM975 rho YJM975/Y12 G1 d129	YPD	30	D	YPD_30	YJM975YJM975	YJM975/Y12	243376
4	45	YJM975YJM975 rho YJM975/Y12 G1 d102	YPD	30	D	YPD_30	YJM975YJM975	YJM975/Y12	214876
5	45	YJM975YJM975 rho YJM975/Y12 G1 d94	YPD	30	D	YPD_30	YJM975YJM975	YJM975/Y12	218184
6	45	YJM975YJM975 rho YJM975/Y12 G1 d110	YPD	30	D	YPD_30	YJM975YJM975	YJM975/Y12	236875
7	45	by	YPD	30	D	YPD_30	by	by	244056
8	45	YJM975YJM975 rho YJM975 control d2	YPD	30	D	YPD_30	YJM975YJM975	YJM975	274842
9	45	YJM975YJM975 rho YJM975/Y12 G1 d83	YPD	30	D	YPD_30	YJM975YJM975	YJM975/Y12	224412
10	45	YJM975YJM975 rho YJM975/Y12 G1 d92	YPD	30	D	YPD_30	YJM975YJM975	YJM975/Y12	224389
11	45	YJM975YJM975 rho YJM975/Y12 G1 d129	YPD	30	D	YPD_30	YJM975YJM975	YJM975/Y12	228682
12	45	YJM975YJM975 rho YJM975/Y12 G1 d130	YPD	30	D	YPD_30	YJM975YJM975	YJM975/Y12	240724
13	45	by	YPD	30	D	YPD_30	by	by	248533
14	45	YJM975YJM975 rho YJM975/Y12 G1 d113	YPD	30	D	YPD_30	YJM975YJM975	YJM975/Y12	237019
15	45	YJM975YJM975 rho YJM975/Y12 G1 d89	YPD	30	D	YPD_30	YJM975YJM975	YJM975/Y12	289274
16	45	YJM975YJM975 rho YJM975/Y12 G1 d122	YPD	30	D	YPD_30	YJM975YJM975	YJM975/Y12	219533
17	45	YJM975YJM975 rho YJM975/Y12 G1 d109	YPD	30	D	YPD_30	YJM975YJM975	YJM975/Y12	224418
19	45	YJM975YJM975 rho YJM975/Y12 G1 d112	YPD	30	D	YPD_30	YJM975YJM975	YJM975/Y12	220184
20	45	YJM975YJM975 rho YJM975/Y12 G1 d127	YPD	30	D	YPD_30	YJM975YJM975	YJM975/Y12	251007
21	45	YJM975YJM975 rho Y12 control d2	YPD	30	D	YPD_30	YJM975YJM975	Y12	210248
22	45	YJM975YJM975 rho YJM975/Y12 G1 d115	YPD	30	D	YPD_30	YJM975YJM975	YJM975/Y12	223698
23	45	by	YPD	30	D	YPD_30	by	by	212083
24	45	YJM975YJM975 rho YJM975/Y12 G1 d117	YPD	30	D	YPD_30	YJM975YJM975	YJM975/Y12	249416
25	45	YJM975YJM975 rho YJM975/Y12 G1 d109	YPD	30	D	YPD_30	YJM975YJM975	YJM975/Y12	250076
26	45	YJM975YJM975 rho YJM975/Y12 G1 d94	YPD	30	D	YPD_30	YJM975YJM975	YJM975/Y12	199854
27	45	YJM975YJM975 rho YJM975/Y12 G1 d86	YPD	30	D	YPD_30	YJM975YJM975	YJM975/Y12	208716
30	45	YJM975YJM975 rho YJM975/Y12 G1 d109	YPD	30	D	YPD_30	YJM975YJM975	YJM975/Y12	173233
3	46	by	YPD	30	D	YPD_30	by	by	216146
4	46	by	YPD	30	D	YPD_30	by	by	224960
5	46	YJM975YJM975 rho YJM975/Y12 G1 d112	YPD	30	D	YPD_30	YJM975YJM975	YJM975/Y12	223720
6	46	YJM975YJM975 rho YJM975/Y12 G1 d119	YPD	30	D	YPD_30	YJM975YJM975	YJM975/Y12	216829
9	46	YJM975YJM975 rho Y12 control d2	YPD	30	D	YPD_30	YJM975YJM975	Y12	232515
10	46	YJM975YJM975 rho YJM975/Y12 G1 d85	YPD	30	D	YPD_30	YJM975YJM975	YJM975/Y12	241056
11	46	YJM975YJM975 rho Y12 control d1	YPD	30	D	YPD_30	YJM975YJM975	Y12	234416
12	46	YJM975YJM975 rho YJM975/Y12 G1 d97	YPD	30	D	YPD_30	YJM975YJM975	YJM975/Y12	227522
13	46	YJM975YJM975 rho YJM975/Y12 G1 d105	YPD	30	D	YPD_30	YJM975YJM975	YJM975/Y12	233581
14	46	YJM975YJM975 rho YJM975/Y12 G1 d86	YPD	30	D	YPD_30	YJM975YJM975	YJM975/Y12	241746
15	46	by	YPD	30	D	YPD_30	by	by	233386
16	46	YJM975YJM975 rho YJM975 control d2	YPD	30	D	YPD_30	YJM975YJM975	YJM975	246036
17	46	YJM975YJM975 rho YJM975/Y12 G1 d88	YPD	30	D	YPD_30	YJM975YJM975	YJM975/Y12	218252
19	46	YJM975YJM975 rho YJM975/Y12 G1 d122	YPD	30	D	YPD_30	YJM975YJM975	YJM975/Y12	212790
20	46	YJM975YJM975 rho YJM975/Y12 G1 d126	YPD	30	D	YPD_30	YJM975YJM975	YJM975/Y12	222893
21	46	YJM975YJM975 rho YJM975/Y12 G1 d95	YPD	30	D	YPD_30	YJM975YJM975	YJM975/Y12	208081
22	46	YJM975YJM975 rho YJM975/Y12 G1 d127	YPD	30	D	YPD_30	YJM975YJM975	YJM975/Y12	221120
23	46	YJM975YJM975 rho YJM975/Y12 G1 d92	YPD	30	D	YPD_30	YJM975YJM975	YJM975/Y12	222439
24	46	YJM975YJM975 rho YJM975/Y12 G1 d83	YPD	30	D	YPD_30	YJM975YJM975	YJM975/Y12	208824
25	46	YJM975YJM975 rho YJM975 control d1	YPD	30	D	YPD_30	YJM975YJM975	YJM975	257235
26	46	YJM975YJM975 rho YJM975/Y12 G1 d119	YPD	30	D	YPD_30	YJM975YJM975	YJM975/Y12	216197
27	46	by	YPD	30	D	YPD_30	by	by	216485
28	46	YJM975YJM975 rho YJM975/Y12 G1 d92	YPD	30	D	YPD_30	YJM975YJM975	YJM975/Y12	198230
29	46	YJM975YJM975 rho YJM975/Y12 G1 d89	YPD	30	D	YPD_30	YJM975YJM975	YJM975/Y12	182041
30	46	YJM975YJM975 rho YJM975/Y12 G1 d97	YPD	30	D	YPD_30	YJM975YJM975	YJM975/Y12	182088
3	3	YJM975YJM975 rho YJM975/Y12 G1 d114	YPD	35	D	YPD_35	YJM975YJM975	YJM975/Y12	179886
4	3	YJM975YJM975 rho YJM975/Y12 G1 d132	YPD	35	D	YPD_35	YJM975YJM975	YJM975/Y12	188166
6	3	YJM975YJM975 rho YJM975/Y12 G1 d112	YPD	35	D	YPD_35	YJM975YJM975	YJM975/Y12	216715
7	3	YJM975YJM975 rho YJM975/Y12 G1 d126	YPD	35	D	YPD_35	YJM975YJM975	YJM975/Y12	217975
9	3	YJM975YJM975 rho YJM975/Y12 G1 d132	YPD	35	D	YPD_35	YJM975YJM975	YJM975/Y12	223873
10	3	YJM975YJM975 rho YJM975/Y12 G1 d118	YPD	35	D	YPD_35	YJM975YJM975	YJM975/Y12	237399
11	3	YJM975YJM975 rho YJM975/Y12 G1 d91	YPD	35	D	YPD_35	YJM975YJM975	YJM975/Y12	232769
12	3	YJM975YJM975 rho YJM975/Y12 G1 d104	YPD	35	D	YPD_35	YJM975YJM975	YJM975/Y12	231423
13	3	YJM975YJM975 rho YJM975/Y12 G1 d106	YPD	35	D	YPD_35	YJM975YJM975	YJM975/Y12	238408
14	3	YJM975YJM975 rho YJM975/Y12 G1 d98	YPD	35	D	YPD_35	YJM975YJM975	YJM975/Y12	231450
15	3	YJM975YJM975 rho YJM975/Y12 G1 d87	YPD	35	D	YPD_35	YJM975YJM975	YJM975/Y12	247993
16	3	YJM975YJM975 rho YJM975/Y12 G1 d92	YPD	35	D	YPD_35	YJM975YJM975	YJM975/Y12	220572
17	3	YJM975YJM975 rho YJM975/Y12 G1 d127	YPD	35	D	YPD_35	YJM975YJM975	YJM975/Y12	219160
18	3	YJM975YJM975 rho YJM975/Y12 G1 d91	YPD	35	D	YPD_35	YJM975YJM975	YJM975/Y12	219187
19	3	by	YPD	35	D	YPD_35	by	by	262713
20	3	YJM975YJM975 rho YJM975/Y12 G1 d114	YPD	35	D	YPD_35	YJM975YJM975	YJM975/Y12	252914
21	3	YJM975YJM975 rho YJM975/Y12 G1 d96	YPD	35	D	YPD_35	YJM975YJM975	YJM975/Y12	284104
22	3	YJM975YJM975 rho YJM975/Y12 G1 d114	YPD	35	D	YPD_35	YJM975YJM975	YJM975/Y12	276072
23	3	YJM975YJM975 rho YJM975 control d1	YPD	35	D	YPD_35	YJM975YJM975	YJM975	281038
24	3	YJM975YJM975 rho YJM975/Y12 G1 d132	YPD	35	D	YPD_35	YJM975YJM975	YJM975/Y12	221352
25	3	YJM975YJM975 rho YJM975/Y12 G1 d123	YPD	35	D	YPD_35	YJM975YJM975	YJM975/Y12	249994
26	3	YJM975YJM975 rho YJM975/Y12 G1 d126	YPD	35	D	YPD_35	YJM975YJM975	YJM975/Y12	230465
28	3	YJM975YJM975 rho YJM975/Y12 G1 d105	YPD	35	D	YPD_35	YJM975YJM975	YJM975/Y12	271113
29	3	YJM975YJM975 rho Y12 control d1	YPD	35	D	YPD_35	YJM975YJM975	Y12	275555
30	3	YJM975YJM975 rho YJM975/Y12 G1 d119	YPD	35	D	YPD_35	YJM975YJM975	YJM975/Y12	243568
3	4	YJM975YJM975 rho YJM975/Y12 G1 d88	YPD	35	D	YPD_35	YJM975YJM975	YJM975/Y12	205455
4	4	YJM975YJM975 rho YJM975/Y12 G1 d112	YPD	35	D	YPD_35	YJM975YJM975	YJM975/Y12	215201
5	4	YJM975YJM975 rho YJM975/Y12 G1 d116	YPD	35	D	YPD_35	YJM975YJM975	YJM975/Y12	234144
6	4	YJM975YJM975 rho YJM975/Y12 G1 d115	YPD	35	D	YPD_35	YJM975YJM975	YJM975/Y12	240209
7	4	YJM975YJM975 rho YJM975/Y12 G1 d89	YPD	35	D	YPD_35	YJM975YJM975	YJM975/Y12	239738
8	4	YJM975YJM975 rho YJM975/Y12 G1 d128	YPD	35	D	YPD_35	YJM975YJM975	YJM975/Y12	232850
9	4	YJM975YJM975 rho YJM975/Y12 G1 d94	YPD	35	D	YPD_35	YJM975YJM975	YJM975/Y12	244005
10	4	YJM975YJM975 rho YJM975/Y12 G1 d116	YPD	35	D	YPD_35	YJM975YJM975	YJM975/Y12	246533
11	4	YJM975YJM975 rho YJM975/Y12 G1 d97	YPD	35	D	YPD_35	YJM975YJM975	YJM975/Y12	246020
12	4	YJM975YJM975 rho YJM975/Y12 G1 d124	YPD	35	D	YPD_35	YJM975YJM975	YJM975/Y12	259114
13	4	YJM975YJM975 rho YJM975/Y12 G1 d88	YPD	35	D	YPD_35	YJM975YJM975	YJM975/Y12	299851
14	4	by	YPD	35	D	YPD_35	by	by	251226
15	4	YJM975YJM975 rho YJM975/Y12 G1 d132	YPD	35	D	YPD_35	YJM975YJM975	YJM975/Y12	251998
16	4	YJM975YJM975 rho YJM975/Y12 G1 d123	YPD	35	D	YPD_35	YJM975YJM975	YJM975/Y12	316603
17	4	YJM975YJM975 rho YJM975/Y12 G1 d129	YPD	35	D	YPD_35	YJM975YJM975	YJM975/Y12	304479
18	4	YJM975YJM975 rho YJM975/Y12 G1 d128	YPD	35	D	YPD_35	YJM975YJM975	YJM975/Y12	292770
19	4	YJM975YJM975 rho YJM975/Y12 G1 d118	YPD	35	D	YPD_35	YJM975YJM975	YJM975/Y12	307996
20	4	YJM975YJM975 rho YJM975/Y12 G1 d128	YPD	35	D	YPD_35	YJM975YJM975	YJM975/Y12	242844
21	4	YJM975YJM975 rho YJM975/Y12 G1 d100	YPD	35	D	YPD_35	YJM975YJM975	YJM975/Y12	236754
22	4	YJM975YJM975 rho YJM975/Y12 G1 d107	YPD	35	D	YPD_35	YJM975YJM975	YJM975/Y12	296112
23	4	YJM975YJM975 rho YJM975/Y12 G1 d128	YPD	35	D	YPD_35	YJM975YJM975	YJM975/Y12	251609
24	4	YJM975YJM975 rho YJM975/Y12 G1 d119	YPD	35	D	YPD_35	YJM975YJM975	YJM975/Y12	254621
25	4	YJM975YJM975 rho YJM975 control d1	YPD	35	D	YPD_35	YJM975YJM975	YJM975	291981
26	4	YJM975YJM975 rho YJM975/Y12 G1 d107	YPD	35	D	YPD_35	YJM975YJM975	YJM975/Y12	294684
27	4	YJM975YJM975 rho YJM975/Y12 G1 d108	YPD	35	D	YPD_35	YJM975YJM975	YJM975/Y12	255832
28	4	YJM975YJM975 rho YJM975/Y12 G1 d122	YPD	35	D	YPD_35	YJM975YJM975	YJM975/Y12	289899
29	4	YJM975YJM975 rho YJM975/Y12 G1 d114	YPD	35	D	YPD_35	YJM975YJM975	YJM975/Y12	228156
30	4	YJM975YJM975 rho YJM975/Y12 G1 d94	YPD	35	D	YPD_35	YJM975YJM975	YJM975/Y12	265126
3	5	YJM975YJM975 rho YJM975/Y12 G1 d106	YPD	35	D	YPD_35	YJM975YJM975	YJM975/Y12	220139
4	5	YJM975YJM975 rho YJM975/Y12 G1 d109	YPD	35	D	YPD_35	YJM975YJM975	YJM975/Y12	227466
5	5	YJM975YJM975 rho YJM975/Y12 G1 d92	YPD	35	D	YPD_35	YJM975YJM975	YJM975/Y12	238984
6	5	YJM975YJM975 rho YJM975/Y12 G1 d89	YPD	35	D	YPD_35	YJM975YJM975	YJM975/Y12	248440
7	5	YJM975YJM975 rho YJM975/Y12 G1 d90	YPD	35	D	YPD_35	YJM975YJM975	YJM975/Y12	242647
8	5	YJM975YJM975 rho YJM975/Y12 G1 d122	YPD	35	D	YPD_35	YJM975YJM975	YJM975/Y12	296764
9	5	YJM975YJM975 rho YJM975/Y12 G1 d91	YPD	35	D	YPD_35	YJM975YJM975	YJM975/Y12	263359
10	5	YJM975YJM975 rho YJM975/Y12 G1 d110	YPD	35	D	YPD_35	YJM975YJM975	YJM975/Y12	269162
11	5	YJM975YJM975 rho YJM975 control d1	YPD	35	D	YPD_35	YJM975YJM975	YJM975	267235
12	5	by	YPD	35	D	YPD_35	by	by	243054
13	5	YJM975YJM975 rho Y12 control d1	YPD	35	D	YPD_35	YJM975YJM975	Y12	262426
14	5	YJM975YJM975 rho Y12 control d1	YPD	35	D	YPD_35	YJM975YJM975	Y12	314917
15	5	by	YPD	35	D	YPD_35	by	by	249824
16	5	YJM975YJM975 rho YJM975/Y12 G1 d116	YPD	35	D	YPD_35	YJM975YJM975	YJM975/Y12	251171
17	5	YJM975YJM975 rho YJM975/Y12 G1 d126	YPD	35	D	YPD_35	YJM975YJM975	YJM975/Y12	304074
18	5	YJM975YJM975 rho YJM975/Y12 G1 d89	YPD	35	D	YPD_35	YJM975YJM975	YJM975/Y12	253609
20	5	YJM975YJM975 rho YJM975/Y12 G1 d105	YPD	35	D	YPD_35	YJM975YJM975	YJM975/Y12	300471
21	5	YJM975YJM975 rho YJM975/Y12 G1 d87	YPD	35	D	YPD_35	YJM975YJM975	YJM975/Y12	303826
22	5	YJM975YJM975 rho Y12 control d2	YPD	35	D	YPD_35	YJM975YJM975	Y12	245053
23	5	YJM975YJM975 rho YJM975/Y12 G1 d83	YPD	35	D	YPD_35	YJM975YJM975	YJM975/Y12	308544
24	5	YJM975YJM975 rho YJM975/Y12 G1 d126	YPD	35	D	YPD_35	YJM975YJM975	YJM975/Y12	248140
25	5	YJM975YJM975 rho YJM975/Y12 G1 d100	YPD	35	D	YPD_35	YJM975YJM975	YJM975/Y12	300970
26	5	YJM975YJM975 rho YJM975/Y12 G1 d117	YPD	35	D	YPD_35	YJM975YJM975	YJM975/Y12	283576
27	5	YJM975YJM975 rho YJM975/Y12 G1 d129	YPD	35	D	YPD_35	YJM975YJM975	YJM975/Y12	306288
28	5	YJM975YJM975 rho YJM975/Y12 G1 d113	YPD	35	D	YPD_35	YJM975YJM975	YJM975/Y12	292436
29	5	YJM975YJM975 rho YJM975/Y12 G1 d83	YPD	35	D	YPD_35	YJM975YJM975	YJM975/Y12	229147
30	5	YJM975YJM975 rho YJM975/Y12 G1 d127	YPD	35	D	YPD_35	YJM975YJM975	YJM975/Y12	272947
3	6	YJM975YJM975 rho YJM975/Y12 G1 d91	YPD	35	D	YPD_35	YJM975YJM975	YJM975/Y12	211783
4	6	YJM975YJM975 rho YJM975/Y12 G1 d122	YPD	35	D	YPD_35	YJM975YJM975	YJM975/Y12	238653
5	6	YJM975YJM975 rho YJM975/Y12 G1 d117	YPD	35	D	YPD_35	YJM975YJM975	YJM975/Y12	230471
6	6	YJM975YJM975 rho YJM975/Y12 G1 d109	YPD	35	D	YPD_35	YJM975YJM975	YJM975/Y12	251037
7	6	YJM975YJM975 rho YJM975 control d2	YPD	35	D	YPD_35	YJM975YJM975	YJM975	260097
8	6	YJM975YJM975 rho YJM975/Y12 G1 d94	YPD	35	D	YPD_35	YJM975YJM975	YJM975/Y12	250895
9	6	YJM975YJM975 rho YJM975/Y12 G1 d89	YPD	35	D	YPD_35	YJM975YJM975	YJM975/Y12	271085
11	6	YJM975YJM975 rho YJM975/Y12 G1 d83	YPD	35	D	YPD_35	YJM975YJM975	YJM975/Y12	273453
12	6	by	YPD	35	D	YPD_35	by	by	237350
13	6	YJM975YJM975 rho YJM975/Y12 G1 d128	YPD	35	D	YPD_35	YJM975YJM975	YJM975/Y12	249328
14	6	YJM975YJM975 rho YJM975/Y12 G1 d103	YPD	35	D	YPD_35	YJM975YJM975	YJM975/Y12	265247
16	6	YJM975YJM975 rho YJM975/Y12 G1 d114	YPD	35	D	YPD_35	YJM975YJM975	YJM975/Y12	258776
17	6	YJM975YJM975 rho YJM975/Y12 G1 d98	YPD	35	D	YPD_35	YJM975YJM975	YJM975/Y12	247882
18	6	YJM975YJM975 rho YJM975/Y12 G1 d98	YPD	35	D	YPD_35	YJM975YJM975	YJM975/Y12	233839
19	6	YJM975YJM975 rho YJM975/Y12 G1 d91	YPD	35	D	YPD_35	YJM975YJM975	YJM975/Y12	316044
20	6	YJM975YJM975 rho YJM975/Y12 G1 d126	YPD	35	D	YPD_35	YJM975YJM975	YJM975/Y12	304220
21	6	YJM975YJM975 rho YJM975/Y12 G1 d110	YPD	35	D	YPD_35	YJM975YJM975	YJM975/Y12	314929
22	6	YJM975YJM975 rho YJM975/Y12 G1 d102	YPD	35	D	YPD_35	YJM975YJM975	YJM975/Y12	234088
23	6	YJM975YJM975 rho YJM975/Y12 G1 d107	YPD	35	D	YPD_35	YJM975YJM975	YJM975/Y12	227829
24	6	YJM975YJM975 rho YJM975/Y12 G1 d113	YPD	35	D	YPD_35	YJM975YJM975	YJM975/Y12	250717
25	6	YJM975YJM975 rho YJM975/Y12 G1 d107	YPD	35	D	YPD_35	YJM975YJM975	YJM975/Y12	233208
26	6	YJM975YJM975 rho YJM975/Y12 G1 d108	YPD	35	D	YPD_35	YJM975YJM975	YJM975/Y12	238175
27	6	YJM975YJM975 rho YJM975/Y12 G1 d113	YPD	35	D	YPD_35	YJM975YJM975	YJM975/Y12	237728
28	6	YJM975YJM975 rho YJM975/Y12 G1 d129	YPD	35	D	YPD_35	YJM975YJM975	YJM975/Y12	239856
29	6	YJM975YJM975 rho YJM975/Y12 G1 d88	YPD	35	D	YPD_35	YJM975YJM975	YJM975/Y12	297633
30	6	YJM975YJM975 rho YJM975/Y12 G1 d115	YPD	35	D	YPD_35	YJM975YJM975	YJM975/Y12	282579
3	7	YJM975YJM975 rho YJM975/Y12 G1 d98	YPD	35	D	YPD_35	YJM975YJM975	YJM975/Y12	229884
4	7	YJM975YJM975 rho YJM975/Y12 G1 d97	YPD	35	D	YPD_35	YJM975YJM975	YJM975/Y12	235727
5	7	YJM975YJM975 rho YJM975/Y12 G1 d107	YPD	35	D	YPD_35	YJM975YJM975	YJM975/Y12	241186
6	7	YJM975YJM975 rho YJM975/Y12 G1 d101	YPD	35	D	YPD_35	YJM975YJM975	YJM975/Y12	258082
7	7	YJM975YJM975 rho YJM975 control d1	YPD	35	D	YPD_35	YJM975YJM975	YJM975	243637
8	7	YJM975YJM975 rho YJM975/Y12 G1 d123	YPD	35	D	YPD_35	YJM975YJM975	YJM975/Y12	312264
9	7	YJM975YJM975 rho YJM975/Y12 G1 d132	YPD	35	D	YPD_35	YJM975YJM975	YJM975/Y12	259157
10	7	YJM975YJM975 rho YJM975/Y12 G1 d92	YPD	35	D	YPD_35	YJM975YJM975	YJM975/Y12	253717
11	7	YJM975YJM975 rho YJM975/Y12 G1 d85	YPD	35	D	YPD_35	YJM975YJM975	YJM975/Y12	271527
12	7	YJM975YJM975 rho YJM975/Y12 G1 d118	YPD	35	D	YPD_35	YJM975YJM975	YJM975/Y12	266902
13	7	YJM975YJM975 rho YJM975/Y12 G1 d86	YPD	35	D	YPD_35	YJM975YJM975	YJM975/Y12	261395
14	7	YJM975YJM975 rho YJM975/Y12 G1 d119	YPD	35	D	YPD_35	YJM975YJM975	YJM975/Y12	319569
15	7	YJM975YJM975 rho YJM975/Y12 G1 d86	YPD	35	D	YPD_35	YJM975YJM975	YJM975/Y12	257134
16	7	YJM975YJM975 rho YJM975/Y12 G1 d85	YPD	35	D	YPD_35	YJM975YJM975	YJM975/Y12	327254
17	7	YJM975YJM975 rho YJM975/Y12 G1 d87	YPD	35	D	YPD_35	YJM975YJM975	YJM975/Y12	317658
18	7	YJM975YJM975 rho YJM975/Y12 G1 d87	YPD	35	D	YPD_35	YJM975YJM975	YJM975/Y12	255060
19	7	YJM975YJM975 rho YJM975/Y12 G1 d97	YPD	35	D	YPD_35	YJM975YJM975	YJM975/Y12	239368
20	7	YJM975YJM975 rho YJM975/Y12 G1 d130	YPD	35	D	YPD_35	YJM975YJM975	YJM975/Y12	321540
21	7	YJM975YJM975 rho YJM975/Y12 G1 d107	YPD	35	D	YPD_35	YJM975YJM975	YJM975/Y12	315624
22	7	YJM975YJM975 rho YJM975/Y12 G1 d116	YPD	35	D	YPD_35	YJM975YJM975	YJM975/Y12	242829
23	7	YJM975YJM975 rho YJM975/Y12 G1 d132	YPD	35	D	YPD_35	YJM975YJM975	YJM975/Y12	315278
24	7	YJM975YJM975 rho YJM975/Y12 G1 d97	YPD	35	D	YPD_35	YJM975YJM975	YJM975/Y12	244997
25	7	YJM975YJM975 rho YJM975/Y12 G1 d100	YPD	35	D	YPD_35	YJM975YJM975	YJM975/Y12	311486
26	7	YJM975YJM975 rho YJM975/Y12 G1 d95	YPD	35	D	YPD_35	YJM975YJM975	YJM975/Y12	240253
27	7	YJM975YJM975 rho YJM975/Y12 G1 d83	YPD	35	D	YPD_35	YJM975YJM975	YJM975/Y12	231503
28	7	YJM975YJM975 rho YJM975/Y12 G1 d129	YPD	35	D	YPD_35	YJM975YJM975	YJM975/Y12	240697
29	7	YJM975YJM975 rho YJM975/Y12 G1 d115	YPD	35	D	YPD_35	YJM975YJM975	YJM975/Y12	242304
30	7	by	YPD	35	D	YPD_35	by	by	243901
3	8	YJM975YJM975 rho YJM975 control d1	YPD	35	D	YPD_35	YJM975YJM975	YJM975	239656
4	8	YJM975YJM975 rho YJM975/Y12 G1 d124	YPD	35	D	YPD_35	YJM975YJM975	YJM975/Y12	231275
5	8	by	YPD	35	D	YPD_35	by	by	256637
6	8	YJM975YJM975 rho YJM975/Y12 G1 d109	YPD	35	D	YPD_35	YJM975YJM975	YJM975/Y12	248180
7	8	YJM975YJM975 rho YJM975/Y12 G1 d114	YPD	35	D	YPD_35	YJM975YJM975	YJM975/Y12	244239
8	8	YJM975YJM975 rho YJM975/Y12 G1 d102	YPD	35	D	YPD_35	YJM975YJM975	YJM975/Y12	254178
9	8	YJM975YJM975 rho YJM975/Y12 G1 d123	YPD	35	D	YPD_35	YJM975YJM975	YJM975/Y12	266424
10	8	YJM975YJM975 rho YJM975 control d2	YPD	35	D	YPD_35	YJM975YJM975	YJM975	270830
11	8	YJM975YJM975 rho YJM975/Y12 G1 d107	YPD	35	D	YPD_35	YJM975YJM975	YJM975/Y12	252190
12	8	YJM975YJM975 rho YJM975/Y12 G1 d127	YPD	35	D	YPD_35	YJM975YJM975	YJM975/Y12	264068
13	8	YJM975YJM975 rho YJM975/Y12 G1 d114	YPD	35	D	YPD_35	YJM975YJM975	YJM975/Y12	266674
14	8	YJM975YJM975 rho YJM975/Y12 G1 d106	YPD	35	D	YPD_35	YJM975YJM975	YJM975/Y12	263051
15	8	YJM975YJM975 rho YJM975/Y12 G1 d87	YPD	35	D	YPD_35	YJM975YJM975	YJM975/Y12	258636
16	8	YJM975YJM975 rho YJM975/Y12 G1 d92	YPD	35	D	YPD_35	YJM975YJM975	YJM975/Y12	320188
17	8	YJM975YJM975 rho YJM975/Y12 G1 d96	YPD	35	D	YPD_35	YJM975YJM975	YJM975/Y12	265956
18	8	YJM975YJM975 rho YJM975/Y12 G1 d107	YPD	35	D	YPD_35	YJM975YJM975	YJM975/Y12	259042
19	8	YJM975YJM975 rho YJM975/Y12 G1 d100	YPD	35	D	YPD_35	YJM975YJM975	YJM975/Y12	254115
20	8	YJM975YJM975 rho YJM975/Y12 G1 d90	YPD	35	D	YPD_35	YJM975YJM975	YJM975/Y12	252830
21	8	YJM975YJM975 rho YJM975/Y12 G1 d90	YPD	35	D	YPD_35	YJM975YJM975	YJM975/Y12	262718
22	8	YJM975YJM975 rho YJM975/Y12 G1 d115	YPD	35	D	YPD_35	YJM975YJM975	YJM975/Y12	320160
23	8	YJM975YJM975 rho YJM975/Y12 G1 d124	YPD	35	D	YPD_35	YJM975YJM975	YJM975/Y12	264496
24	8	YJM975YJM975 rho YJM975/Y12 G1 d109	YPD	35	D	YPD_35	YJM975YJM975	YJM975/Y12	305737
25	8	YJM975YJM975 rho YJM975/Y12 G1 d100	YPD	35	D	YPD_35	YJM975YJM975	YJM975/Y12	306754
26	8	YJM975YJM975 rho YJM975/Y12 G1 d116	YPD	35	D	YPD_35	YJM975YJM975	YJM975/Y12	248819
27	8	YJM975YJM975 rho YJM975/Y12 G1 d129	YPD	35	D	YPD_35	YJM975YJM975	YJM975/Y12	261562
28	8	YJM975YJM975 rho YJM975/Y12 G1 d102	YPD	35	D	YPD_35	YJM975YJM975	YJM975/Y12	247683
29	8	YJM975YJM975 rho YJM975/Y12 G1 d86	YPD	35	D	YPD_35	YJM975YJM975	YJM975/Y12	271160
3	9	YJM975YJM975 rho YJM975/Y12 G1 d101	YPD	35	D	YPD_35	YJM975YJM975	YJM975/Y12	234991
4	9	YJM975YJM975 rho YJM975/Y12 G1 d129	YPD	35	D	YPD_35	YJM975YJM975	YJM975/Y12	250410
5	9	YJM975YJM975 rho Y12 control d1	YPD	35	D	YPD_35	YJM975YJM975	Y12	247054
6	9	YJM975YJM975 rho YJM975/Y12 G1 d86	YPD	35	D	YPD_35	YJM975YJM975	YJM975/Y12	255121
7	9	YJM975YJM975 rho YJM975/Y12 G1 d102	YPD	35	D	YPD_35	YJM975YJM975	YJM975/Y12	260579
8	9	YJM975YJM975 rho YJM975/Y12 G1 d90	YPD	35	D	YPD_35	YJM975YJM975	YJM975/Y12	252199
9	9	YJM975YJM975 rho YJM975/Y12 G1 d89	YPD	35	D	YPD_35	YJM975YJM975	YJM975/Y12	268269
10	9	YJM975YJM975 rho YJM975/Y12 G1 d90	YPD	35	D	YPD_35	YJM975YJM975	YJM975/Y12	256923
11	9	YJM975YJM975 rho YJM975/Y12 G1 d118	YPD	35	D	YPD_35	YJM975YJM975	YJM975/Y12	268165
12	9	YJM975YJM975 rho YJM975/Y12 G1 d124	YPD	35	D	YPD_35	YJM975YJM975	YJM975/Y12	257376
13	9	YJM975YJM975 rho YJM975/Y12 G1 d100	YPD	35	D	YPD_35	YJM975YJM975	YJM975/Y12	278583
14	9	YJM975YJM975 rho YJM975/Y12 G1 d118	YPD	35	D	YPD_35	YJM975YJM975	YJM975/Y12	269362
15	9	YJM975YJM975 rho YJM975/Y12 G1 d126	YPD	35	D	YPD_35	YJM975YJM975	YJM975/Y12	253332
16	9	YJM975YJM975 rho YJM975/Y12 G1 d85	YPD	35	D	YPD_35	YJM975YJM975	YJM975/Y12	271509
17	9	by	YPD	35	D	YPD_35	by	by	250676
18	9	YJM975YJM975 rho YJM975/Y12 G1 d96	YPD	35	D	YPD_35	YJM975YJM975	YJM975/Y12	265093
19	9	YJM975YJM975 rho YJM975/Y12 G1 d123	YPD	35	D	YPD_35	YJM975YJM975	YJM975/Y12	329753
20	9	YJM975YJM975 rho YJM975/Y12 G1 d106	YPD	35	D	YPD_35	YJM975YJM975	YJM975/Y12	257216
21	9	YJM975YJM975 rho YJM975/Y12 G1 d96	YPD	35	D	YPD_35	YJM975YJM975	YJM975/Y12	324298
22	9	YJM975YJM975 rho YJM975/Y12 G1 d91	YPD	35	D	YPD_35	YJM975YJM975	YJM975/Y12	261515
23	9	YJM975YJM975 rho YJM975/Y12 G1 d108	YPD	35	D	YPD_35	YJM975YJM975	YJM975/Y12	255117
24	9	YJM975YJM975 rho YJM975/Y12 G1 d97	YPD	35	D	YPD_35	YJM975YJM975	YJM975/Y12	252869
25	9	YJM975YJM975 rho YJM975/Y12 G1 d98	YPD	35	D	YPD_35	YJM975YJM975	YJM975/Y12	259517
26	9	YJM975YJM975 rho YJM975/Y12 G1 d116	YPD	35	D	YPD_35	YJM975YJM975	YJM975/Y12	324003
27	9	YJM975YJM975 rho YJM975/Y12 G1 d107	YPD	35	D	YPD_35	YJM975YJM975	YJM975/Y12	302325
28	9	YJM975YJM975 rho YJM975/Y12 G1 d124	YPD	35	D	YPD_35	YJM975YJM975	YJM975/Y12	259322
29	9	YJM975YJM975 rho YJM975/Y12 G1 d108	YPD	35	D	YPD_35	YJM975YJM975	YJM975/Y12	246597
30	9	YJM975YJM975 rho YJM975/Y12 G1 d110	YPD	35	D	YPD_35	YJM975YJM975	YJM975/Y12	270763
3	10	YJM975YJM975 rho YJM975/Y12 G1 d116	YPD	35	D	YPD_35	YJM975YJM975	YJM975/Y12	233243
4	10	YJM975YJM975 rho YJM975/Y12 G1 d110	YPD	35	D	YPD_35	YJM975YJM975	YJM975/Y12	252769
5	10	YJM975YJM975 rho YJM975/Y12 G1 d94	YPD	35	D	YPD_35	YJM975YJM975	YJM975/Y12	236451
6	10	YJM975YJM975 rho YJM975/Y12 G1 d100	YPD	35	D	YPD_35	YJM975YJM975	YJM975/Y12	258098
7	10	YJM975YJM975 rho YJM975/Y12 G1 d92	YPD	35	D	YPD_35	YJM975YJM975	YJM975/Y12	254298
8	10	YJM975YJM975 rho YJM975/Y12 G1 d117	YPD	35	D	YPD_35	YJM975YJM975	YJM975/Y12	265311
9	10	YJM975YJM975 rho YJM975/Y12 G1 d91	YPD	35	D	YPD_35	YJM975YJM975	YJM975/Y12	257447
10	10	YJM975YJM975 rho YJM975/Y12 G1 d118	YPD	35	D	YPD_35	YJM975YJM975	YJM975/Y12	272574
11	10	YJM975YJM975 rho YJM975/Y12 G1 d105	YPD	35	D	YPD_35	YJM975YJM975	YJM975/Y12	250917
12	10	YJM975YJM975 rho YJM975/Y12 G1 d127	YPD	35	D	YPD_35	YJM975YJM975	YJM975/Y12	267054
13	10	YJM975YJM975 rho YJM975/Y12 G1 d109	YPD	35	D	YPD_35	YJM975YJM975	YJM975/Y12	245284
14	10	YJM975YJM975 rho YJM975/Y12 G1 d129	YPD	35	D	YPD_35	YJM975YJM975	YJM975/Y12	275323
15	10	by	YPD	35	D	YPD_35	by	by	247740
16	10	YJM975YJM975 rho YJM975/Y12 G1 d91	YPD	35	D	YPD_35	YJM975YJM975	YJM975/Y12	265653
17	10	YJM975YJM975 rho YJM975/Y12 G1 d126	YPD	35	D	YPD_35	YJM975YJM975	YJM975/Y12	262201
18	10	YJM975YJM975 rho YJM975/Y12 G1 d96	YPD	35	D	YPD_35	YJM975YJM975	YJM975/Y12	250606
19	10	by	YPD	35	D	YPD_35	by	by	251390
20	10	YJM975YJM975 rho YJM975/Y12 G1 d103	YPD	35	D	YPD_35	YJM975YJM975	YJM975/Y12	255789
21	10	YJM975YJM975 rho YJM975/Y12 G1 d85	YPD	35	D	YPD_35	YJM975YJM975	YJM975/Y12	328750
22	10	YJM975YJM975 rho YJM975/Y12 G1 d85	YPD	35	D	YPD_35	YJM975YJM975	YJM975/Y12	265845
23	10	YJM975YJM975 rho YJM975/Y12 G1 d115	YPD	35	D	YPD_35	YJM975YJM975	YJM975/Y12	268878
24	10	YJM975YJM975 rho YJM975/Y12 G1 d86	YPD	35	D	YPD_35	YJM975YJM975	YJM975/Y12	267989
25	10	YJM975YJM975 rho YJM975/Y12 G1 d126	YPD	35	D	YPD_35	YJM975YJM975	YJM975/Y12	315070
26	10	YJM975YJM975 rho YJM975/Y12 G1 d97	YPD	35	D	YPD_35	YJM975YJM975	YJM975/Y12	249735
27	10	YJM975YJM975 rho YJM975/Y12 G1 d113	YPD	35	D	YPD_35	YJM975YJM975	YJM975/Y12	262572
28	10	by	YPD	35	D	YPD_35	by	by	242765
29	10	YJM975YJM975 rho YJM975/Y12 G1 d96	YPD	35	D	YPD_35	YJM975YJM975	YJM975/Y12	253802
30	10	YJM975YJM975 rho YJM975/Y12 G1 d130	YPD	35	D	YPD_35	YJM975YJM975	YJM975/Y12	249167
3	11	YJM975YJM975 rho YJM975/Y12 G1 d88	YPD	35	D	YPD_35	YJM975YJM975	YJM975/Y12	231069
4	11	by	YPD	35	D	YPD_35	by	by	270128
5	11	YJM975YJM975 rho YJM975/Y12 G1 d88	YPD	35	D	YPD_35	YJM975YJM975	YJM975/Y12	258436
6	11	YJM975YJM975 rho YJM975/Y12 G1 d114	YPD	35	D	YPD_35	YJM975YJM975	YJM975/Y12	245912
7	11	YJM975YJM975 rho YJM975/Y12 G1 d88	YPD	35	D	YPD_35	YJM975YJM975	YJM975/Y12	258620
8	11	YJM975YJM975 rho YJM975/Y12 G1 d107	YPD	35	D	YPD_35	YJM975YJM975	YJM975/Y12	257897
9	11	by	YPD	35	D	YPD_35	by	by	248832
10	11	YJM975YJM975 rho YJM975/Y12 G1 d109	YPD	35	D	YPD_35	YJM975YJM975	YJM975/Y12	255140
11	11	YJM975YJM975 rho YJM975/Y12 G1 d119	YPD	35	D	YPD_35	YJM975YJM975	YJM975/Y12	266714
12	11	YJM975YJM975 rho YJM975/Y12 G1 d100	YPD	35	D	YPD_35	YJM975YJM975	YJM975/Y12	270993
13	11	by	YPD	35	D	YPD_35	by	by	257002
14	11	YJM975YJM975 rho YJM975/Y12 G1 d107	YPD	35	D	YPD_35	YJM975YJM975	YJM975/Y12	271736
15	11	YJM975YJM975 rho YJM975/Y12 G1 d105	YPD	35	D	YPD_35	YJM975YJM975	YJM975/Y12	261210
17	11	by	YPD	35	D	YPD_35	by	by	245783
18	11	YJM975YJM975 rho YJM975 control d2	YPD	35	D	YPD_35	YJM975YJM975	YJM975	273986
19	11	YJM975YJM975 rho YJM975/Y12 G1 d127	YPD	35	D	YPD_35	YJM975YJM975	YJM975/Y12	252397
20	11	YJM975YJM975 rho YJM975/Y12 G1 d112	YPD	35	D	YPD_35	YJM975YJM975	YJM975/Y12	252957
22	11	by	YPD	35	D	YPD_35	by	by	234995
23	11	YJM975YJM975 rho YJM975/Y12 G1 d107	YPD	35	D	YPD_35	YJM975YJM975	YJM975/Y12	246062
24	11	YJM975YJM975 rho YJM975/Y12 G1 d130	YPD	35	D	YPD_35	YJM975YJM975	YJM975/Y12	273307
25	11	YJM975YJM975 rho YJM975/Y12 G1 d117	YPD	35	D	YPD_35	YJM975YJM975	YJM975/Y12	250943
27	11	YJM975YJM975 rho YJM975/Y12 G1 d103	YPD	35	D	YPD_35	YJM975YJM975	YJM975/Y12	256766
28	11	YJM975YJM975 rho YJM975 control d1	YPD	35	D	YPD_35	YJM975YJM975	YJM975	272059
29	11	YJM975YJM975 rho YJM975/Y12 G1 d91	YPD	35	D	YPD_35	YJM975YJM975	YJM975/Y12	313948
30	11	YJM975YJM975 rho YJM975/Y12 G1 d107	YPD	35	D	YPD_35	YJM975YJM975	YJM975/Y12	245175
3	12	YJM975YJM975 rho YJM975/Y12 G1 d108	YPD	35	D	YPD_35	YJM975YJM975	YJM975/Y12	222456
4	12	YJM975YJM975 rho YJM975/Y12 G1 d113	YPD	35	D	YPD_35	YJM975YJM975	YJM975/Y12	249841
5	12	YJM975YJM975 rho YJM975/Y12 G1 d115	YPD	35	D	YPD_35	YJM975YJM975	YJM975/Y12	255242
6	12	YJM975YJM975 rho YJM975/Y12 G1 d102	YPD	35	D	YPD_35	YJM975YJM975	YJM975/Y12	252159
7	12	YJM975YJM975 rho YJM975/Y12 G1 d85	YPD	35	D	YPD_35	YJM975YJM975	YJM975/Y12	259951
8	12	YJM975YJM975 rho Y12 control d1	YPD	35	D	YPD_35	YJM975YJM975	Y12	261012
9	12	YJM975YJM975 rho YJM975/Y12 G1 d97	YPD	35	D	YPD_35	YJM975YJM975	YJM975/Y12	247191
11	12	YJM975YJM975 rho YJM975/Y12 G1 d91	YPD	35	D	YPD_35	YJM975YJM975	YJM975/Y12	266762
12	12	YJM975YJM975 rho YJM975 control d1	YPD	35	D	YPD_35	YJM975YJM975	YJM975	267319
13	12	YJM975YJM975 rho YJM975 control d1	YPD	35	D	YPD_35	YJM975YJM975	YJM975	285528
14	12	by	YPD	35	D	YPD_35	by	by	262767
15	12	YJM975YJM975 rho YJM975/Y12 G1 d87	YPD	35	D	YPD_35	YJM975YJM975	YJM975/Y12	283185
17	12	YJM975YJM975 rho YJM975/Y12 G1 d130	YPD	35	D	YPD_35	YJM975YJM975	YJM975/Y12	261785
18	12	YJM975YJM975 rho YJM975/Y12 G1 d100	YPD	35	D	YPD_35	YJM975YJM975	YJM975/Y12	258099
19	12	YJM975YJM975 rho Y12 control d2	YPD	35	D	YPD_35	YJM975YJM975	Y12	263919
21	12	YJM975YJM975 rho YJM975/Y12 G1 d85	YPD	35	D	YPD_35	YJM975YJM975	YJM975/Y12	260922
22	12	YJM975YJM975 rho YJM975/Y12 G1 d91	YPD	35	D	YPD_35	YJM975YJM975	YJM975/Y12	267733
23	12	YJM975YJM975 rho YJM975/Y12 G1 d83	YPD	35	D	YPD_35	YJM975YJM975	YJM975/Y12	272848
24	12	YJM975YJM975 rho YJM975/Y12 G1 d105	YPD	35	D	YPD_35	YJM975YJM975	YJM975/Y12	252173
25	12	YJM975YJM975 rho Y12 control d2	YPD	35	D	YPD_35	YJM975YJM975	Y12	277493
27	12	YJM975YJM975 rho YJM975/Y12 G1 d113	YPD	35	D	YPD_35	YJM975YJM975	YJM975/Y12	266954
28	12	YJM975YJM975 rho YJM975/Y12 G1 d94	YPD	35	D	YPD_35	YJM975YJM975	YJM975/Y12	254863
29	12	YJM975YJM975 rho YJM975 control d2	YPD	35	D	YPD_35	YJM975YJM975	YJM975	263377
30	12	YJM975YJM975 rho YJM975/Y12 G1 d102	YPD	35	D	YPD_35	YJM975YJM975	YJM975/Y12	246553
3	13	YJM975YJM975 rho YJM975/Y12 G1 d117	YPD	35	D	YPD_35	YJM975YJM975	YJM975/Y12	227367
4	13	YJM975YJM975 rho YJM975/Y12 G1 d112	YPD	35	D	YPD_35	YJM975YJM975	YJM975/Y12	244822
5	13	YJM975YJM975 rho YJM975/Y12 G1 d101	YPD	35	D	YPD_35	YJM975YJM975	YJM975/Y12	250469
6	13	YJM975YJM975 rho YJM975/Y12 G1 d96	YPD	35	D	YPD_35	YJM975YJM975	YJM975/Y12	239725
7	13	YJM975YJM975 rho YJM975/Y12 G1 d108	YPD	35	D	YPD_35	YJM975YJM975	YJM975/Y12	260101
8	13	YJM975YJM975 rho YJM975/Y12 G1 d101	YPD	35	D	YPD_35	YJM975YJM975	YJM975/Y12	256566
9	13	YJM975YJM975 rho YJM975/Y12 G1 d116	YPD	35	D	YPD_35	YJM975YJM975	YJM975/Y12	262767
10	13	YJM975YJM975 rho YJM975/Y12 G1 d83	YPD	35	D	YPD_35	YJM975YJM975	YJM975/Y12	262100
11	13	YJM975YJM975 rho YJM975/Y12 G1 d126	YPD	35	D	YPD_35	YJM975YJM975	YJM975/Y12	262103
12	13	YJM975YJM975 rho YJM975/Y12 G1 d88	YPD	35	D	YPD_35	YJM975YJM975	YJM975/Y12	278907
13	13	by	YPD	35	D	YPD_35	by	by	257776
14	13	by	YPD	35	D	YPD_35	by	by	238935
15	13	YJM975YJM975 rho YJM975/Y12 G1 d118	YPD	35	D	YPD_35	YJM975YJM975	YJM975/Y12	276349
16	13	YJM975YJM975 rho YJM975/Y12 G1 d108	YPD	35	D	YPD_35	YJM975YJM975	YJM975/Y12	276782
17	13	YJM975YJM975 rho YJM975/Y12 G1 d103	YPD	35	D	YPD_35	YJM975YJM975	YJM975/Y12	268509
18	13	YJM975YJM975 rho YJM975/Y12 G1 d85	YPD	35	D	YPD_35	YJM975YJM975	YJM975/Y12	273449
19	13	YJM975YJM975 rho YJM975/Y12 G1 d109	YPD	35	D	YPD_35	YJM975YJM975	YJM975/Y12	252099
20	13	YJM975YJM975 rho YJM975/Y12 G1 d88	YPD	35	D	YPD_35	YJM975YJM975	YJM975/Y12	268076
21	13	YJM975YJM975 rho YJM975/Y12 G1 d132	YPD	35	D	YPD_35	YJM975YJM975	YJM975/Y12	259075
22	13	YJM975YJM975 rho YJM975/Y12 G1 d115	YPD	35	D	YPD_35	YJM975YJM975	YJM975/Y12	269939
23	13	YJM975YJM975 rho YJM975/Y12 G1 d124	YPD	35	D	YPD_35	YJM975YJM975	YJM975/Y12	253352
24	13	YJM975YJM975 rho YJM975/Y12 G1 d104	YPD	35	D	YPD_35	YJM975YJM975	YJM975/Y12	259720
25	13	YJM975YJM975 rho YJM975/Y12 G1 d92	YPD	35	D	YPD_35	YJM975YJM975	YJM975/Y12	269074
26	13	YJM975YJM975 rho YJM975/Y12 G1 d114	YPD	35	D	YPD_35	YJM975YJM975	YJM975/Y12	256082
27	13	YJM975YJM975 rho YJM975/Y12 G1 d95	YPD	35	D	YPD_35	YJM975YJM975	YJM975/Y12	264962
28	13	YJM975YJM975 rho Y12 control d1	YPD	35	D	YPD_35	YJM975YJM975	Y12	318481
29	13	YJM975YJM975 rho YJM975/Y12 G1 d98	YPD	35	D	YPD_35	YJM975YJM975	YJM975/Y12	235817
30	13	YJM975YJM975 rho YJM975/Y12 G1 d130	YPD	35	D	YPD_35	YJM975YJM975	YJM975/Y12	240729
3	14	YJM975YJM975 rho YJM975/Y12 G1 d86	YPD	35	D	YPD_35	YJM975YJM975	YJM975/Y12	220847
4	14	YJM975YJM975 rho Y12 control d1	YPD	35	D	YPD_35	YJM975YJM975	Y12	245792
5	14	YJM975YJM975 rho YJM975/Y12 G1 d98	YPD	35	D	YPD_35	YJM975YJM975	YJM975/Y12	234929
6	14	YJM975YJM975 rho YJM975/Y12 G1 d88	YPD	35	D	YPD_35	YJM975YJM975	YJM975/Y12	252548
7	14	YJM975YJM975 rho YJM975/Y12 G1 d107	YPD	35	D	YPD_35	YJM975YJM975	YJM975/Y12	255552
8	14	YJM975YJM975 rho YJM975/Y12 G1 d118	YPD	35	D	YPD_35	YJM975YJM975	YJM975/Y12	263169
9	14	YJM975YJM975 rho YJM975/Y12 G1 d110	YPD	35	D	YPD_35	YJM975YJM975	YJM975/Y12	271602
10	14	YJM975YJM975 rho YJM975/Y12 G1 d127	YPD	35	D	YPD_35	YJM975YJM975	YJM975/Y12	256080
11	14	YJM975YJM975 rho YJM975/Y12 G1 d101	YPD	35	D	YPD_35	YJM975YJM975	YJM975/Y12	268292
12	14	YJM975YJM975 rho YJM975/Y12 G1 d130	YPD	35	D	YPD_35	YJM975YJM975	YJM975/Y12	277883
13	14	YJM975YJM975 rho YJM975/Y12 G1 d109	YPD	35	D	YPD_35	YJM975YJM975	YJM975/Y12	263394
14	14	YJM975YJM975 rho YJM975/Y12 G1 d87	YPD	35	D	YPD_35	YJM975YJM975	YJM975/Y12	272913
15	14	YJM975YJM975 rho YJM975/Y12 G1 d86	YPD	35	D	YPD_35	YJM975YJM975	YJM975/Y12	254824
16	14	YJM975YJM975 rho YJM975/Y12 G1 d100	YPD	35	D	YPD_35	YJM975YJM975	YJM975/Y12	272297
17	14	by	YPD	35	D	YPD_35	by	by	266430
18	14	YJM975YJM975 rho YJM975/Y12 G1 d132	YPD	35	D	YPD_35	YJM975YJM975	YJM975/Y12	263607
19	14	YJM975YJM975 rho YJM975/Y12 G1 d116	YPD	35	D	YPD_35	YJM975YJM975	YJM975/Y12	263806
20	14	YJM975YJM975 rho YJM975/Y12 G1 d104	YPD	35	D	YPD_35	YJM975YJM975	YJM975/Y12	255635
21	14	YJM975YJM975 rho YJM975 control d2	YPD	35	D	YPD_35	YJM975YJM975	YJM975	261819
22	14	YJM975YJM975 rho Y12 control d2	YPD	35	D	YPD_35	YJM975YJM975	Y12	268701
23	14	YJM975YJM975 rho YJM975/Y12 G1 d124	YPD	35	D	YPD_35	YJM975YJM975	YJM975/Y12	253237
24	14	YJM975YJM975 rho YJM975/Y12 G1 d92	YPD	35	D	YPD_35	YJM975YJM975	YJM975/Y12	252166
26	14	YJM975YJM975 rho YJM975/Y12 G1 d115	YPD	35	D	YPD_35	YJM975YJM975	YJM975/Y12	266857
27	14	YJM975YJM975 rho YJM975/Y12 G1 d132	YPD	35	D	YPD_35	YJM975YJM975	YJM975/Y12	322584
28	14	YJM975YJM975 rho YJM975/Y12 G1 d109	YPD	35	D	YPD_35	YJM975YJM975	YJM975/Y12	270975
29	14	YJM975YJM975 rho YJM975/Y12 G1 d122	YPD	35	D	YPD_35	YJM975YJM975	YJM975/Y12	253765
30	14	by	YPD	35	D	YPD_35	by	by	268349
4	15	by	YPD	35	D	YPD_35	by	by	246757
5	15	YJM975YJM975 rho YJM975/Y12 G1 d90	YPD	35	D	YPD_35	YJM975YJM975	YJM975/Y12	241235
6	15	YJM975YJM975 rho YJM975/Y12 G1 d108	YPD	35	D	YPD_35	YJM975YJM975	YJM975/Y12	263716
7	15	YJM975YJM975 rho YJM975/Y12 G1 d110	YPD	35	D	YPD_35	YJM975YJM975	YJM975/Y12	260664
8	15	YJM975YJM975 rho YJM975/Y12 G1 d118	YPD	35	D	YPD_35	YJM975YJM975	YJM975/Y12	261507
9	15	YJM975YJM975 rho YJM975/Y12 G1 d118	YPD	35	D	YPD_35	YJM975YJM975	YJM975/Y12	283437
11	15	YJM975YJM975 rho YJM975/Y12 G1 d110	YPD	35	D	YPD_35	YJM975YJM975	YJM975/Y12	268271
12	15	YJM975YJM975 rho YJM975/Y12 G1 d88	YPD	35	D	YPD_35	YJM975YJM975	YJM975/Y12	266419
13	15	YJM975YJM975 rho YJM975/Y12 G1 d96	YPD	35	D	YPD_35	YJM975YJM975	YJM975/Y12	265089
14	15	YJM975YJM975 rho YJM975/Y12 G1 d119	YPD	35	D	YPD_35	YJM975YJM975	YJM975/Y12	263129
15	15	YJM975YJM975 rho YJM975/Y12 G1 d116	YPD	35	D	YPD_35	YJM975YJM975	YJM975/Y12	275811
16	15	YJM975YJM975 rho YJM975/Y12 G1 d86	YPD	35	D	YPD_35	YJM975YJM975	YJM975/Y12	259239
17	15	YJM975YJM975 rho YJM975/Y12 G1 d104	YPD	35	D	YPD_35	YJM975YJM975	YJM975/Y12	264727
18	15	by	YPD	35	D	YPD_35	by	by	276901
19	15	YJM975YJM975 rho YJM975/Y12 G1 d132	YPD	35	D	YPD_35	YJM975YJM975	YJM975/Y12	258670
20	15	YJM975YJM975 rho YJM975/Y12 G1 d87	YPD	35	D	YPD_35	YJM975YJM975	YJM975/Y12	268583
21	15	YJM975YJM975 rho YJM975/Y12 G1 d86	YPD	35	D	YPD_35	YJM975YJM975	YJM975/Y12	261656
22	15	YJM975YJM975 rho YJM975/Y12 G1 d98	YPD	35	D	YPD_35	YJM975YJM975	YJM975/Y12	268269
23	15	YJM975YJM975 rho YJM975/Y12 G1 d110	YPD	35	D	YPD_35	YJM975YJM975	YJM975/Y12	267198
24	15	YJM975YJM975 rho YJM975/Y12 G1 d94	YPD	35	D	YPD_35	YJM975YJM975	YJM975/Y12	261969
25	15	YJM975YJM975 rho YJM975/Y12 G1 d109	YPD	35	D	YPD_35	YJM975YJM975	YJM975/Y12	245205
26	15	YJM975YJM975 rho YJM975/Y12 G1 d106	YPD	35	D	YPD_35	YJM975YJM975	YJM975/Y12	263737
27	15	YJM975YJM975 rho YJM975/Y12 G1 d118	YPD	35	D	YPD_35	YJM975YJM975	YJM975/Y12	268621
28	15	YJM975YJM975 rho YJM975/Y12 G1 d95	YPD	35	D	YPD_35	YJM975YJM975	YJM975/Y12	247899
29	15	YJM975YJM975 rho YJM975 control d2	YPD	35	D	YPD_35	YJM975YJM975	YJM975	275601
30	15	YJM975YJM975 rho YJM975/Y12 G1 d115	YPD	35	D	YPD_35	YJM975YJM975	YJM975/Y12	243530
3	16	YJM975YJM975 rho Y12 control d2	YPD	35	D	YPD_35	YJM975YJM975	Y12	234173
4	16	YJM975YJM975 rho YJM975 control d1	YPD	35	D	YPD_35	YJM975YJM975	YJM975	249959
5	16	YJM975YJM975 rho YJM975/Y12 G1 d129	YPD	35	D	YPD_35	YJM975YJM975	YJM975/Y12	252921
6	16	YJM975YJM975 rho YJM975/Y12 G1 d86	YPD	35	D	YPD_35	YJM975YJM975	YJM975/Y12	252686
7	16	YJM975YJM975 rho YJM975/Y12 G1 d86	YPD	35	D	YPD_35	YJM975YJM975	YJM975/Y12	264325
8	16	YJM975YJM975 rho YJM975/Y12 G1 d130	YPD	35	D	YPD_35	YJM975YJM975	YJM975/Y12	252177
9	16	YJM975YJM975 rho YJM975/Y12 G1 d95	YPD	35	D	YPD_35	YJM975YJM975	YJM975/Y12	264006
10	16	YJM975YJM975 rho YJM975/Y12 G1 d98	YPD	35	D	YPD_35	YJM975YJM975	YJM975/Y12	262497
11	16	by	YPD	35	D	YPD_35	by	by	272970
12	16	YJM975YJM975 rho YJM975/Y12 G1 d123	YPD	35	D	YPD_35	YJM975YJM975	YJM975/Y12	270978
13	16	YJM975YJM975 rho YJM975/Y12 G1 d92	YPD	35	D	YPD_35	YJM975YJM975	YJM975/Y12	261892
14	16	YJM975YJM975 rho YJM975/Y12 G1 d95	YPD	35	D	YPD_35	YJM975YJM975	YJM975/Y12	276376
15	16	by	YPD	35	D	YPD_35	by	by	263215
16	16	YJM975YJM975 rho YJM975/Y12 G1 d92	YPD	35	D	YPD_35	YJM975YJM975	YJM975/Y12	260539
17	16	YJM975YJM975 rho YJM975/Y12 G1 d119	YPD	35	D	YPD_35	YJM975YJM975	YJM975/Y12	262667
18	16	YJM975YJM975 rho YJM975/Y12 G1 d88	YPD	35	D	YPD_35	YJM975YJM975	YJM975/Y12	254545
20	16	YJM975YJM975 rho YJM975 control d1	YPD	35	D	YPD_35	YJM975YJM975	YJM975	263364
22	16	YJM975YJM975 rho YJM975/Y12 G1 d105	YPD	35	D	YPD_35	YJM975YJM975	YJM975/Y12	262903
23	16	YJM975YJM975 rho YJM975/Y12 G1 d104	YPD	35	D	YPD_35	YJM975YJM975	YJM975/Y12	275206
24	16	YJM975YJM975 rho YJM975/Y12 G1 d83	YPD	35	D	YPD_35	YJM975YJM975	YJM975/Y12	266836
25	16	YJM975YJM975 rho YJM975/Y12 G1 d90	YPD	35	D	YPD_35	YJM975YJM975	YJM975/Y12	252258
26	16	YJM975YJM975 rho YJM975/Y12 G1 d88	YPD	35	D	YPD_35	YJM975YJM975	YJM975/Y12	269081
27	16	YJM975YJM975 rho YJM975/Y12 G1 d128	YPD	35	D	YPD_35	YJM975YJM975	YJM975/Y12	249222
28	16	YJM975YJM975 rho YJM975/Y12 G1 d90	YPD	35	D	YPD_35	YJM975YJM975	YJM975/Y12	274358
29	16	YJM975YJM975 rho YJM975/Y12 G1 d117	YPD	35	D	YPD_35	YJM975YJM975	YJM975/Y12	251607
30	16	YJM975YJM975 rho YJM975/Y12 G1 d103	YPD	35	D	YPD_35	YJM975YJM975	YJM975/Y12	246972
3	17	YJM975YJM975 rho YJM975/Y12 G1 d104	YPD	35	D	YPD_35	YJM975YJM975	YJM975/Y12	229312
4	17	YJM975YJM975 rho YJM975/Y12 G1 d83	YPD	35	D	YPD_35	YJM975YJM975	YJM975/Y12	228414
5	17	YJM975YJM975 rho YJM975/Y12 G1 d123	YPD	35	D	YPD_35	YJM975YJM975	YJM975/Y12	252141
6	17	YJM975YJM975 rho YJM975/Y12 G1 d90	YPD	35	D	YPD_35	YJM975YJM975	YJM975/Y12	252447
7	17	YJM975YJM975 rho YJM975/Y12 G1 d90	YPD	35	D	YPD_35	YJM975YJM975	YJM975/Y12	253336
8	17	YJM975YJM975 rho YJM975/Y12 G1 d100	YPD	35	D	YPD_35	YJM975YJM975	YJM975/Y12	271621
9	17	YJM975YJM975 rho YJM975/Y12 G1 d94	YPD	35	D	YPD_35	YJM975YJM975	YJM975/Y12	261848
10	17	YJM975YJM975 rho YJM975/Y12 G1 d103	YPD	35	D	YPD_35	YJM975YJM975	YJM975/Y12	279688
11	17	YJM975YJM975 rho YJM975/Y12 G1 d116	YPD	35	D	YPD_35	YJM975YJM975	YJM975/Y12	259578
12	17	YJM975YJM975 rho YJM975/Y12 G1 d129	YPD	35	D	YPD_35	YJM975YJM975	YJM975/Y12	262538
13	17	YJM975YJM975 rho YJM975/Y12 G1 d87	YPD	35	D	YPD_35	YJM975YJM975	YJM975/Y12	268291
14	17	by	YPD	35	D	YPD_35	by	by	264530
15	17	YJM975YJM975 rho YJM975/Y12 G1 d109	YPD	35	D	YPD_35	YJM975YJM975	YJM975/Y12	266057
16	17	YJM975YJM975 rho YJM975/Y12 G1 d94	YPD	35	D	YPD_35	YJM975YJM975	YJM975/Y12	263310
17	17	YJM975YJM975 rho YJM975/Y12 G1 d104	YPD	35	D	YPD_35	YJM975YJM975	YJM975/Y12	258565
18	17	YJM975YJM975 rho Y12 control d2	YPD	35	D	YPD_35	YJM975YJM975	Y12	275865
19	17	YJM975YJM975 rho YJM975 control d2	YPD	35	D	YPD_35	YJM975YJM975	YJM975	255310
20	17	YJM975YJM975 rho YJM975/Y12 G1 d87	YPD	35	D	YPD_35	YJM975YJM975	YJM975/Y12	272887
21	17	YJM975YJM975 rho YJM975/Y12 G1 d129	YPD	35	D	YPD_35	YJM975YJM975	YJM975/Y12	263059
22	17	YJM975YJM975 rho YJM975/Y12 G1 d87	YPD	35	D	YPD_35	YJM975YJM975	YJM975/Y12	261814
23	17	YJM975YJM975 rho YJM975/Y12 G1 d95	YPD	35	D	YPD_35	YJM975YJM975	YJM975/Y12	240330
24	17	YJM975YJM975 rho Y12 control d1	YPD	35	D	YPD_35	YJM975YJM975	Y12	282119
25	17	YJM975YJM975 rho YJM975/Y12 G1 d110	YPD	35	D	YPD_35	YJM975YJM975	YJM975/Y12	259649
26	17	YJM975YJM975 rho YJM975/Y12 G1 d98	YPD	35	D	YPD_35	YJM975YJM975	YJM975/Y12	270145
27	17	YJM975YJM975 rho YJM975 control d2	YPD	35	D	YPD_35	YJM975YJM975	YJM975	269103
28	17	YJM975YJM975 rho YJM975/Y12 G1 d109	YPD	35	D	YPD_35	YJM975YJM975	YJM975/Y12	262543
29	17	YJM975YJM975 rho YJM975/Y12 G1 d95	YPD	35	D	YPD_35	YJM975YJM975	YJM975/Y12	265083
30	17	YJM975YJM975 rho YJM975/Y12 G1 d107	YPD	35	D	YPD_35	YJM975YJM975	YJM975/Y12	244119
3	18	YJM975YJM975 rho YJM975/Y12 G1 d115	YPD	35	D	YPD_35	YJM975YJM975	YJM975/Y12	222685
4	18	YJM975YJM975 rho YJM975/Y12 G1 d85	YPD	35	D	YPD_35	YJM975YJM975	YJM975/Y12	239976
5	18	YJM975YJM975 rho YJM975/Y12 G1 d113	YPD	35	D	YPD_35	YJM975YJM975	YJM975/Y12	252020
6	18	YJM975YJM975 rho YJM975/Y12 G1 d92	YPD	35	D	YPD_35	YJM975YJM975	YJM975/Y12	243337
7	18	YJM975YJM975 rho YJM975/Y12 G1 d87	YPD	35	D	YPD_35	YJM975YJM975	YJM975/Y12	262441
8	18	YJM975YJM975 rho YJM975/Y12 G1 d122	YPD	35	D	YPD_35	YJM975YJM975	YJM975/Y12	257209
9	18	YJM975YJM975 rho YJM975/Y12 G1 d128	YPD	35	D	YPD_35	YJM975YJM975	YJM975/Y12	269586
10	18	YJM975YJM975 rho YJM975/Y12 G1 d132	YPD	35	D	YPD_35	YJM975YJM975	YJM975/Y12	268289
11	18	YJM975YJM975 rho YJM975/Y12 G1 d94	YPD	35	D	YPD_35	YJM975YJM975	YJM975/Y12	256793
12	18	YJM975YJM975 rho YJM975 control d2	YPD	35	D	YPD_35	YJM975YJM975	YJM975	261174
13	18	by	YPD	35	D	YPD_35	by	by	265729
14	18	by	YPD	35	D	YPD_35	by	by	254588
15	18	YJM975YJM975 rho YJM975/Y12 G1 d126	YPD	35	D	YPD_35	YJM975YJM975	YJM975/Y12	258657
16	18	YJM975YJM975 rho YJM975/Y12 G1 d128	YPD	35	D	YPD_35	YJM975YJM975	YJM975/Y12	242374
18	18	YJM975YJM975 rho YJM975/Y12 G1 d105	YPD	35	D	YPD_35	YJM975YJM975	YJM975/Y12	252052
19	18	YJM975YJM975 rho YJM975/Y12 G1 d132	YPD	35	D	YPD_35	YJM975YJM975	YJM975/Y12	282839
20	18	YJM975YJM975 rho YJM975/Y12 G1 d106	YPD	35	D	YPD_35	YJM975YJM975	YJM975/Y12	257513
21	18	YJM975YJM975 rho YJM975/Y12 G1 d112	YPD	35	D	YPD_35	YJM975YJM975	YJM975/Y12	245888
22	18	YJM975YJM975 rho YJM975/Y12 G1 d128	YPD	35	D	YPD_35	YJM975YJM975	YJM975/Y12	243993
23	18	YJM975YJM975 rho YJM975/Y12 G1 d85	YPD	35	D	YPD_35	YJM975YJM975	YJM975/Y12	256454
24	18	YJM975YJM975 rho YJM975/Y12 G1 d101	YPD	35	D	YPD_35	YJM975YJM975	YJM975/Y12	253564
25	18	YJM975YJM975 rho YJM975/Y12 G1 d115	YPD	35	D	YPD_35	YJM975YJM975	YJM975/Y12	254730
26	18	by	YPD	35	D	YPD_35	by	by	278607
27	18	YJM975YJM975 rho YJM975/Y12 G1 d96	YPD	35	D	YPD_35	YJM975YJM975	YJM975/Y12	249194
28	18	YJM975YJM975 rho YJM975/Y12 G1 d100	YPD	35	D	YPD_35	YJM975YJM975	YJM975/Y12	263109
29	18	YJM975YJM975 rho YJM975/Y12 G1 d106	YPD	35	D	YPD_35	YJM975YJM975	YJM975/Y12	249635
30	18	YJM975YJM975 rho Y12 control d2	YPD	35	D	YPD_35	YJM975YJM975	Y12	255808
3	19	YJM975YJM975 rho Y12 control d2	YPD	35	D	YPD_35	YJM975YJM975	Y12	239317
4	19	YJM975YJM975 rho YJM975 control d2	YPD	35	D	YPD_35	YJM975YJM975	YJM975	238542
5	19	YJM975YJM975 rho YJM975/Y12 G1 d116	YPD	35	D	YPD_35	YJM975YJM975	YJM975/Y12	240606
6	19	YJM975YJM975 rho Y12 control d2	YPD	35	D	YPD_35	YJM975YJM975	Y12	270759
7	19	YJM975YJM975 rho YJM975 control d2	YPD	35	D	YPD_35	YJM975YJM975	YJM975	259438
8	19	YJM975YJM975 rho YJM975 control d1	YPD	35	D	YPD_35	YJM975YJM975	YJM975	269046
9	19	YJM975YJM975 rho YJM975/Y12 G1 d105	YPD	35	D	YPD_35	YJM975YJM975	YJM975/Y12	262861
10	19	YJM975YJM975 rho YJM975/Y12 G1 d127	YPD	35	D	YPD_35	YJM975YJM975	YJM975/Y12	264818
11	19	by	YPD	35	D	YPD_35	by	by	279041
12	19	YJM975YJM975 rho YJM975/Y12 G1 d100	YPD	35	D	YPD_35	YJM975YJM975	YJM975/Y12	282526
13	19	YJM975YJM975 rho YJM975/Y12 G1 d96	YPD	35	D	YPD_35	YJM975YJM975	YJM975/Y12	254918
14	19	YJM975YJM975 rho YJM975/Y12 G1 d96	YPD	35	D	YPD_35	YJM975YJM975	YJM975/Y12	260334
15	19	YJM975YJM975 rho YJM975/Y12 G1 d124	YPD	35	D	YPD_35	YJM975YJM975	YJM975/Y12	257420
16	19	YJM975YJM975 rho YJM975/Y12 G1 d117	YPD	35	D	YPD_35	YJM975YJM975	YJM975/Y12	255907
17	19	YJM975YJM975 rho YJM975/Y12 G1 d130	YPD	35	D	YPD_35	YJM975YJM975	YJM975/Y12	251406
18	19	YJM975YJM975 rho YJM975/Y12 G1 d123	YPD	35	D	YPD_35	YJM975YJM975	YJM975/Y12	248900
21	19	YJM975YJM975 rho YJM975/Y12 G1 d85	YPD	35	D	YPD_35	YJM975YJM975	YJM975/Y12	256963
22	19	YJM975YJM975 rho YJM975/Y12 G1 d97	YPD	35	D	YPD_35	YJM975YJM975	YJM975/Y12	254961
23	19	YJM975YJM975 rho YJM975/Y12 G1 d115	YPD	35	D	YPD_35	YJM975YJM975	YJM975/Y12	249382
24	19	YJM975YJM975 rho YJM975 control d2	YPD	35	D	YPD_35	YJM975YJM975	YJM975	250200
25	19	YJM975YJM975 rho YJM975/Y12 G1 d114	YPD	35	D	YPD_35	YJM975YJM975	YJM975/Y12	256467
26	19	YJM975YJM975 rho YJM975/Y12 G1 d113	YPD	35	D	YPD_35	YJM975YJM975	YJM975/Y12	272564
27	19	YJM975YJM975 rho YJM975/Y12 G1 d104	YPD	35	D	YPD_35	YJM975YJM975	YJM975/Y12	271003
28	19	YJM975YJM975 rho YJM975/Y12 G1 d130	YPD	35	D	YPD_35	YJM975YJM975	YJM975/Y12	246186
29	19	YJM975YJM975 rho YJM975/Y12 G1 d129	YPD	35	D	YPD_35	YJM975YJM975	YJM975/Y12	254141
30	19	by	YPD	35	D	YPD_35	by	by	265947
3	20	YJM975YJM975 rho YJM975/Y12 G1 d114	YPD	35	D	YPD_35	YJM975YJM975	YJM975/Y12	216810
4	20	YJM975YJM975 rho YJM975 control d1	YPD	35	D	YPD_35	YJM975YJM975	YJM975	251451
5	20	YJM975YJM975 rho YJM975/Y12 G1 d126	YPD	35	D	YPD_35	YJM975YJM975	YJM975/Y12	253055
7	20	YJM975YJM975 rho YJM975/Y12 G1 d109	YPD	35	D	YPD_35	YJM975YJM975	YJM975/Y12	259747
8	20	YJM975YJM975 rho YJM975/Y12 G1 d122	YPD	35	D	YPD_35	YJM975YJM975	YJM975/Y12	259526
9	20	YJM975YJM975 rho YJM975/Y12 G1 d103	YPD	35	D	YPD_35	YJM975YJM975	YJM975/Y12	264656
10	20	YJM975YJM975 rho YJM975/Y12 G1 d113	YPD	35	D	YPD_35	YJM975YJM975	YJM975/Y12	274015
11	20	YJM975YJM975 rho YJM975/Y12 G1 d130	YPD	35	D	YPD_35	YJM975YJM975	YJM975/Y12	263948
12	20	YJM975YJM975 rho YJM975/Y12 G1 d104	YPD	35	D	YPD_35	YJM975YJM975	YJM975/Y12	255864
13	20	YJM975YJM975 rho YJM975/Y12 G1 d130	YPD	35	D	YPD_35	YJM975YJM975	YJM975/Y12	267208
14	20	YJM975YJM975 rho YJM975/Y12 G1 d107	YPD	35	D	YPD_35	YJM975YJM975	YJM975/Y12	252515
15	20	YJM975YJM975 rho YJM975/Y12 G1 d95	YPD	35	D	YPD_35	YJM975YJM975	YJM975/Y12	256651
16	20	YJM975YJM975 rho YJM975/Y12 G1 d112	YPD	35	D	YPD_35	YJM975YJM975	YJM975/Y12	254381
17	20	YJM975YJM975 rho YJM975/Y12 G1 d95	YPD	35	D	YPD_35	YJM975YJM975	YJM975/Y12	244700
18	20	YJM975YJM975 rho YJM975/Y12 G1 d86	YPD	35	D	YPD_35	YJM975YJM975	YJM975/Y12	271691
19	20	YJM975YJM975 rho YJM975/Y12 G1 d110	YPD	35	D	YPD_35	YJM975YJM975	YJM975/Y12	262199
20	20	YJM975YJM975 rho YJM975/Y12 G1 d112	YPD	35	D	YPD_35	YJM975YJM975	YJM975/Y12	260271
21	20	by	YPD	35	D	YPD_35	by	by	240466
22	20	YJM975YJM975 rho YJM975/Y12 G1 d83	YPD	35	D	YPD_35	YJM975YJM975	YJM975/Y12	253744
23	20	YJM975YJM975 rho YJM975/Y12 G1 d101	YPD	35	D	YPD_35	YJM975YJM975	YJM975/Y12	259583
24	20	YJM975YJM975 rho YJM975/Y12 G1 d113	YPD	35	D	YPD_35	YJM975YJM975	YJM975/Y12	264318
25	20	YJM975YJM975 rho YJM975/Y12 G1 d96	YPD	35	D	YPD_35	YJM975YJM975	YJM975/Y12	251980
26	20	YJM975YJM975 rho YJM975/Y12 G1 d101	YPD	35	D	YPD_35	YJM975YJM975	YJM975/Y12	255019
27	20	YJM975YJM975 rho YJM975/Y12 G1 d117	YPD	35	D	YPD_35	YJM975YJM975	YJM975/Y12	250080
28	20	YJM975YJM975 rho YJM975/Y12 G1 d89	YPD	35	D	YPD_35	YJM975YJM975	YJM975/Y12	266063
29	20	YJM975YJM975 rho YJM975/Y12 G1 d108	YPD	35	D	YPD_35	YJM975YJM975	YJM975/Y12	254239
30	20	YJM975YJM975 rho YJM975 control d1	YPD	35	D	YPD_35	YJM975YJM975	YJM975	256135
3	21	YJM975YJM975 rho YJM975/Y12 G1 d114	YPD	35	D	YPD_35	YJM975YJM975	YJM975/Y12	212151
4	21	YJM975YJM975 rho YJM975/Y12 G1 d97	YPD	35	D	YPD_35	YJM975YJM975	YJM975/Y12	232162
5	21	YJM975YJM975 rho YJM975/Y12 G1 d88	YPD	35	D	YPD_35	YJM975YJM975	YJM975/Y12	248657
6	21	YJM975YJM975 rho YJM975/Y12 G1 d96	YPD	35	D	YPD_35	YJM975YJM975	YJM975/Y12	258102
7	21	YJM975YJM975 rho YJM975/Y12 G1 d116	YPD	35	D	YPD_35	YJM975YJM975	YJM975/Y12	279535
8	21	YJM975YJM975 rho YJM975/Y12 G1 d124	YPD	35	D	YPD_35	YJM975YJM975	YJM975/Y12	262820
9	21	YJM975YJM975 rho YJM975/Y12 G1 d87	YPD	35	D	YPD_35	YJM975YJM975	YJM975/Y12	279391
10	21	YJM975YJM975 rho YJM975/Y12 G1 d106	YPD	35	D	YPD_35	YJM975YJM975	YJM975/Y12	252922
11	21	YJM975YJM975 rho YJM975/Y12 G1 d122	YPD	35	D	YPD_35	YJM975YJM975	YJM975/Y12	251140
12	21	YJM975YJM975 rho YJM975/Y12 G1 d105	YPD	35	D	YPD_35	YJM975YJM975	YJM975/Y12	247998
13	21	YJM975YJM975 rho YJM975/Y12 G1 d101	YPD	35	D	YPD_35	YJM975YJM975	YJM975/Y12	257404
14	21	YJM975YJM975 rho YJM975/Y12 G1 d122	YPD	35	D	YPD_35	YJM975YJM975	YJM975/Y12	244329
15	21	YJM975YJM975 rho YJM975/Y12 G1 d100	YPD	35	D	YPD_35	YJM975YJM975	YJM975/Y12	253743
16	21	YJM975YJM975 rho Y12 control d2	YPD	35	D	YPD_35	YJM975YJM975	Y12	249750
17	21	YJM975YJM975 rho YJM975/Y12 G1 d87	YPD	35	D	YPD_35	YJM975YJM975	YJM975/Y12	262912
18	21	YJM975YJM975 rho YJM975/Y12 G1 d88	YPD	35	D	YPD_35	YJM975YJM975	YJM975/Y12	242678
19	21	YJM975YJM975 rho YJM975/Y12 G1 d92	YPD	35	D	YPD_35	YJM975YJM975	YJM975/Y12	261922
20	21	YJM975YJM975 rho YJM975/Y12 G1 d122	YPD	35	D	YPD_35	YJM975YJM975	YJM975/Y12	251827
21	21	YJM975YJM975 rho YJM975/Y12 G1 d100	YPD	35	D	YPD_35	YJM975YJM975	YJM975/Y12	256148
22	21	YJM975YJM975 rho YJM975/Y12 G1 d87	YPD	35	D	YPD_35	YJM975YJM975	YJM975/Y12	255292
23	21	YJM975YJM975 rho YJM975/Y12 G1 d113	YPD	35	D	YPD_35	YJM975YJM975	YJM975/Y12	244317
24	21	YJM975YJM975 rho YJM975/Y12 G1 d92	YPD	35	D	YPD_35	YJM975YJM975	YJM975/Y12	246222
25	21	YJM975YJM975 rho YJM975/Y12 G1 d119	YPD	35	D	YPD_35	YJM975YJM975	YJM975/Y12	260873
26	21	YJM975YJM975 rho YJM975/Y12 G1 d119	YPD	35	D	YPD_35	YJM975YJM975	YJM975/Y12	268102
27	21	YJM975YJM975 rho YJM975/Y12 G1 d124	YPD	35	D	YPD_35	YJM975YJM975	YJM975/Y12	255707
28	21	YJM975YJM975 rho YJM975/Y12 G1 d109	YPD	35	D	YPD_35	YJM975YJM975	YJM975/Y12	255994
29	21	YJM975YJM975 rho Y12 control d2	YPD	35	D	YPD_35	YJM975YJM975	Y12	274326
30	21	YJM975YJM975 rho YJM975/Y12 G1 d94	YPD	35	D	YPD_35	YJM975YJM975	YJM975/Y12	236816
3	22	YJM975YJM975 rho YJM975/Y12 G1 d130	YPD	35	D	YPD_35	YJM975YJM975	YJM975/Y12	226730
4	22	YJM975YJM975 rho Y12 control d1	YPD	35	D	YPD_35	YJM975YJM975	Y12	236741
5	22	YJM975YJM975 rho YJM975/Y12 G1 d128	YPD	35	D	YPD_35	YJM975YJM975	YJM975/Y12	245967
6	22	YJM975YJM975 rho YJM975/Y12 G1 d122	YPD	35	D	YPD_35	YJM975YJM975	YJM975/Y12	263254
7	22	YJM975YJM975 rho YJM975/Y12 G1 d114	YPD	35	D	YPD_35	YJM975YJM975	YJM975/Y12	265360
8	22	YJM975YJM975 rho YJM975/Y12 G1 d122	YPD	35	D	YPD_35	YJM975YJM975	YJM975/Y12	266510
9	22	by	YPD	35	D	YPD_35	by	by	257694
10	22	YJM975YJM975 rho YJM975/Y12 G1 d96	YPD	35	D	YPD_35	YJM975YJM975	YJM975/Y12	250459
11	22	YJM975YJM975 rho YJM975/Y12 G1 d100	YPD	35	D	YPD_35	YJM975YJM975	YJM975/Y12	257522
13	22	YJM975YJM975 rho YJM975/Y12 G1 d105	YPD	35	D	YPD_35	YJM975YJM975	YJM975/Y12	260157
14	22	YJM975YJM975 rho YJM975/Y12 G1 d112	YPD	35	D	YPD_35	YJM975YJM975	YJM975/Y12	255738
15	22	YJM975YJM975 rho YJM975/Y12 G1 d106	YPD	35	D	YPD_35	YJM975YJM975	YJM975/Y12	251381
16	22	by	YPD	35	D	YPD_35	by	by	262605
17	22	YJM975YJM975 rho YJM975/Y12 G1 d112	YPD	35	D	YPD_35	YJM975YJM975	YJM975/Y12	242923
18	22	YJM975YJM975 rho YJM975/Y12 G1 d112	YPD	35	D	YPD_35	YJM975YJM975	YJM975/Y12	246552
19	22	YJM975YJM975 rho YJM975/Y12 G1 d129	YPD	35	D	YPD_35	YJM975YJM975	YJM975/Y12	264223
20	22	YJM975YJM975 rho YJM975/Y12 G1 d96	YPD	35	D	YPD_35	YJM975YJM975	YJM975/Y12	238239
22	22	YJM975YJM975 rho YJM975/Y12 G1 d114	YPD	35	D	YPD_35	YJM975YJM975	YJM975/Y12	241143
23	22	YJM975YJM975 rho YJM975/Y12 G1 d98	YPD	35	D	YPD_35	YJM975YJM975	YJM975/Y12	247949
24	22	YJM975YJM975 rho YJM975/Y12 G1 d104	YPD	35	D	YPD_35	YJM975YJM975	YJM975/Y12	253341
25	22	YJM975YJM975 rho YJM975/Y12 G1 d119	YPD	35	D	YPD_35	YJM975YJM975	YJM975/Y12	268085
26	22	by	YPD	35	D	YPD_35	by	by	253934
27	22	YJM975YJM975 rho YJM975/Y12 G1 d123	YPD	35	D	YPD_35	YJM975YJM975	YJM975/Y12	266078
28	22	YJM975YJM975 rho YJM975/Y12 G1 d124	YPD	35	D	YPD_35	YJM975YJM975	YJM975/Y12	243143
29	22	YJM975YJM975 rho YJM975/Y12 G1 d103	YPD	35	D	YPD_35	YJM975YJM975	YJM975/Y12	245722
30	22	YJM975YJM975 rho YJM975/Y12 G1 d112	YPD	35	D	YPD_35	YJM975YJM975	YJM975/Y12	243033
3	23	YJM975YJM975 rho Y12 control d2	YPD	35	D	YPD_35	YJM975YJM975	Y12	191649
4	23	by	YPD	35	D	YPD_35	by	by	234126
5	23	YJM975YJM975 rho YJM975/Y12 G1 d114	YPD	35	D	YPD_35	YJM975YJM975	YJM975/Y12	250512
7	23	YJM975YJM975 rho YJM975/Y12 G1 d114	YPD	35	D	YPD_35	YJM975YJM975	YJM975/Y12	273231
8	23	YJM975YJM975 rho YJM975/Y12 G1 d90	YPD	35	D	YPD_35	YJM975YJM975	YJM975/Y12	269121
9	23	YJM975YJM975 rho YJM975/Y12 G1 d86	YPD	35	D	YPD_35	YJM975YJM975	YJM975/Y12	258868
10	23	YJM975YJM975 rho YJM975/Y12 G1 d108	YPD	35	D	YPD_35	YJM975YJM975	YJM975/Y12	245894
11	23	YJM975YJM975 rho YJM975/Y12 G1 d129	YPD	35	D	YPD_35	YJM975YJM975	YJM975/Y12	256016
12	23	YJM975YJM975 rho YJM975/Y12 G1 d86	YPD	35	D	YPD_35	YJM975YJM975	YJM975/Y12	253411
13	23	YJM975YJM975 rho YJM975/Y12 G1 d97	YPD	35	D	YPD_35	YJM975YJM975	YJM975/Y12	245811
14	23	YJM975YJM975 rho YJM975/Y12 G1 d107	YPD	35	D	YPD_35	YJM975YJM975	YJM975/Y12	257916
15	23	YJM975YJM975 rho YJM975/Y12 G1 d123	YPD	35	D	YPD_35	YJM975YJM975	YJM975/Y12	269044
16	23	YJM975YJM975 rho YJM975/Y12 G1 d96	YPD	35	D	YPD_35	YJM975YJM975	YJM975/Y12	254964
17	23	YJM975YJM975 rho YJM975/Y12 G1 d96	YPD	35	D	YPD_35	YJM975YJM975	YJM975/Y12	235486
18	23	YJM975YJM975 rho YJM975/Y12 G1 d115	YPD	35	D	YPD_35	YJM975YJM975	YJM975/Y12	262456
19	23	YJM975YJM975 rho YJM975/Y12 G1 d96	YPD	35	D	YPD_35	YJM975YJM975	YJM975/Y12	243989
20	23	YJM975YJM975 rho YJM975/Y12 G1 d124	YPD	35	D	YPD_35	YJM975YJM975	YJM975/Y12	250766
21	23	YJM975YJM975 rho YJM975/Y12 G1 d105	YPD	35	D	YPD_35	YJM975YJM975	YJM975/Y12	235221
22	23	YJM975YJM975 rho YJM975/Y12 G1 d110	YPD	35	D	YPD_35	YJM975YJM975	YJM975/Y12	261770
23	23	YJM975YJM975 rho YJM975/Y12 G1 d104	YPD	35	D	YPD_35	YJM975YJM975	YJM975/Y12	250311
24	23	YJM975YJM975 rho YJM975/Y12 G1 d132	YPD	35	D	YPD_35	YJM975YJM975	YJM975/Y12	241557
25	23	by	YPD	35	D	YPD_35	by	by	269481
26	23	YJM975YJM975 rho YJM975/Y12 G1 d83	YPD	35	D	YPD_35	YJM975YJM975	YJM975/Y12	258058
27	23	YJM975YJM975 rho YJM975/Y12 G1 d112	YPD	35	D	YPD_35	YJM975YJM975	YJM975/Y12	243636
28	23	YJM975YJM975 rho YJM975/Y12 G1 d108	YPD	35	D	YPD_35	YJM975YJM975	YJM975/Y12	266095
29	23	YJM975YJM975 rho YJM975/Y12 G1 d128	YPD	35	D	YPD_35	YJM975YJM975	YJM975/Y12	250522
30	23	YJM975YJM975 rho YJM975/Y12 G1 d118	YPD	35	D	YPD_35	YJM975YJM975	YJM975/Y12	232741
3	24	YJM975YJM975 rho Y12 control d1	YPD	35	D	YPD_35	YJM975YJM975	Y12	215466
4	24	YJM975YJM975 rho YJM975/Y12 G1 d89	YPD	35	D	YPD_35	YJM975YJM975	YJM975/Y12	233281
5	24	YJM975YJM975 rho YJM975/Y12 G1 d117	YPD	35	D	YPD_35	YJM975YJM975	YJM975/Y12	248696
6	24	YJM975YJM975 rho YJM975/Y12 G1 d132	YPD	35	D	YPD_35	YJM975YJM975	YJM975/Y12	269466
7	24	YJM975YJM975 rho YJM975/Y12 G1 d115	YPD	35	D	YPD_35	YJM975YJM975	YJM975/Y12	271319
8	24	YJM975YJM975 rho YJM975/Y12 G1 d126	YPD	35	D	YPD_35	YJM975YJM975	YJM975/Y12	256963
9	24	YJM975YJM975 rho YJM975/Y12 G1 d130	YPD	35	D	YPD_35	YJM975YJM975	YJM975/Y12	264586
10	24	YJM975YJM975 rho YJM975/Y12 G1 d115	YPD	35	D	YPD_35	YJM975YJM975	YJM975/Y12	254041
12	24	YJM975YJM975 rho YJM975/Y12 G1 d115	YPD	35	D	YPD_35	YJM975YJM975	YJM975/Y12	255172
13	24	YJM975YJM975 rho YJM975/Y12 G1 d105	YPD	35	D	YPD_35	YJM975YJM975	YJM975/Y12	247363
14	24	by	YPD	35	D	YPD_35	by	by	261236
15	24	YJM975YJM975 rho YJM975/Y12 G1 d106	YPD	35	D	YPD_35	YJM975YJM975	YJM975/Y12	256670
16	24	YJM975YJM975 rho Y12 control d1	YPD	35	D	YPD_35	YJM975YJM975	Y12	253401
17	24	YJM975YJM975 rho YJM975/Y12 G1 d87	YPD	35	D	YPD_35	YJM975YJM975	YJM975/Y12	246808
18	24	YJM975YJM975 rho YJM975/Y12 G1 d92	YPD	35	D	YPD_35	YJM975YJM975	YJM975/Y12	235372
19	24	YJM975YJM975 rho YJM975/Y12 G1 d123	YPD	35	D	YPD_35	YJM975YJM975	YJM975/Y12	262354
20	24	YJM975YJM975 rho YJM975/Y12 G1 d114	YPD	35	D	YPD_35	YJM975YJM975	YJM975/Y12	234708
21	24	YJM975YJM975 rho Y12 control d1	YPD	35	D	YPD_35	YJM975YJM975	Y12	264281
22	24	YJM975YJM975 rho YJM975/Y12 G1 d101	YPD	35	D	YPD_35	YJM975YJM975	YJM975/Y12	235313
23	24	YJM975YJM975 rho YJM975/Y12 G1 d116	YPD	35	D	YPD_35	YJM975YJM975	YJM975/Y12	254708
24	24	YJM975YJM975 rho YJM975/Y12 G1 d86	YPD	35	D	YPD_35	YJM975YJM975	YJM975/Y12	258654
25	24	YJM975YJM975 rho YJM975/Y12 G1 d126	YPD	35	D	YPD_35	YJM975YJM975	YJM975/Y12	210552
26	24	YJM975YJM975 rho YJM975/Y12 G1 d90	YPD	35	D	YPD_35	YJM975YJM975	YJM975/Y12	246541
27	24	YJM975YJM975 rho YJM975/Y12 G1 d83	YPD	35	D	YPD_35	YJM975YJM975	YJM975/Y12	245438
28	24	YJM975YJM975 rho YJM975/Y12 G1 d118	YPD	35	D	YPD_35	YJM975YJM975	YJM975/Y12	263286
29	24	YJM975YJM975 rho YJM975/Y12 G1 d97	YPD	35	D	YPD_35	YJM975YJM975	YJM975/Y12	221268
3	25	YJM975YJM975 rho YJM975/Y12 G1 d130	YPD	35	D	YPD_35	YJM975YJM975	YJM975/Y12	216391
4	25	YJM975YJM975 rho YJM975/Y12 G1 d90	YPD	35	D	YPD_35	YJM975YJM975	YJM975/Y12	232297
5	25	YJM975YJM975 rho YJM975/Y12 G1 d127	YPD	35	D	YPD_35	YJM975YJM975	YJM975/Y12	243224
6	25	YJM975YJM975 rho YJM975/Y12 G1 d91	YPD	35	D	YPD_35	YJM975YJM975	YJM975/Y12	259843
7	25	YJM975YJM975 rho YJM975/Y12 G1 d112	YPD	35	D	YPD_35	YJM975YJM975	YJM975/Y12	244675
8	25	YJM975YJM975 rho YJM975/Y12 G1 d107	YPD	35	D	YPD_35	YJM975YJM975	YJM975/Y12	254524
9	25	YJM975YJM975 rho YJM975/Y12 G1 d123	YPD	35	D	YPD_35	YJM975YJM975	YJM975/Y12	256151
10	25	YJM975YJM975 rho YJM975/Y12 G1 d114	YPD	35	D	YPD_35	YJM975YJM975	YJM975/Y12	247081
11	25	YJM975YJM975 rho YJM975/Y12 G1 d122	YPD	35	D	YPD_35	YJM975YJM975	YJM975/Y12	252005
12	25	YJM975YJM975 rho YJM975/Y12 G1 d83	YPD	35	D	YPD_35	YJM975YJM975	YJM975/Y12	254562
13	25	YJM975YJM975 rho YJM975/Y12 G1 d124	YPD	35	D	YPD_35	YJM975YJM975	YJM975/Y12	258044
14	25	YJM975YJM975 rho YJM975/Y12 G1 d105	YPD	35	D	YPD_35	YJM975YJM975	YJM975/Y12	242966
15	25	YJM975YJM975 rho YJM975/Y12 G1 d128	YPD	35	D	YPD_35	YJM975YJM975	YJM975/Y12	236457
16	25	YJM975YJM975 rho YJM975/Y12 G1 d115	YPD	35	D	YPD_35	YJM975YJM975	YJM975/Y12	249029
17	25	YJM975YJM975 rho YJM975/Y12 G1 d115	YPD	35	D	YPD_35	YJM975YJM975	YJM975/Y12	235203
18	25	YJM975YJM975 rho YJM975/Y12 G1 d112	YPD	35	D	YPD_35	YJM975YJM975	YJM975/Y12	227868
19	25	YJM975YJM975 rho YJM975/Y12 G1 d100	YPD	35	D	YPD_35	YJM975YJM975	YJM975/Y12	252867
20	25	YJM975YJM975 rho YJM975/Y12 G1 d88	YPD	35	D	YPD_35	YJM975YJM975	YJM975/Y12	256758
21	25	YJM975YJM975 rho YJM975/Y12 G1 d122	YPD	35	D	YPD_35	YJM975YJM975	YJM975/Y12	231785
22	25	YJM975YJM975 rho YJM975/Y12 G1 d113	YPD	35	D	YPD_35	YJM975YJM975	YJM975/Y12	258426
23	25	YJM975YJM975 rho YJM975/Y12 G1 d86	YPD	35	D	YPD_35	YJM975YJM975	YJM975/Y12	248634
24	25	YJM975YJM975 rho YJM975/Y12 G1 d122	YPD	35	D	YPD_35	YJM975YJM975	YJM975/Y12	247788
25	25	YJM975YJM975 rho YJM975/Y12 G1 d113	YPD	35	D	YPD_35	YJM975YJM975	YJM975/Y12	231916
26	25	YJM975YJM975 rho YJM975/Y12 G1 d110	YPD	35	D	YPD_35	YJM975YJM975	YJM975/Y12	241241
27	25	YJM975YJM975 rho YJM975/Y12 G1 d104	YPD	35	D	YPD_35	YJM975YJM975	YJM975/Y12	237940
28	25	YJM975YJM975 rho YJM975/Y12 G1 d126	YPD	35	D	YPD_35	YJM975YJM975	YJM975/Y12	238832
30	25	YJM975YJM975 rho YJM975/Y12 G1 d126	YPD	35	D	YPD_35	YJM975YJM975	YJM975/Y12	223430
3	26	YJM975YJM975 rho YJM975/Y12 G1 d108	YPD	35	D	YPD_35	YJM975YJM975	YJM975/Y12	210939
4	26	YJM975YJM975 rho YJM975/Y12 G1 d87	YPD	35	D	YPD_35	YJM975YJM975	YJM975/Y12	243281
5	26	YJM975YJM975 rho YJM975/Y12 G1 d97	YPD	35	D	YPD_35	YJM975YJM975	YJM975/Y12	235861
6	26	YJM975YJM975 rho YJM975/Y12 G1 d103	YPD	35	D	YPD_35	YJM975YJM975	YJM975/Y12	248716
7	26	YJM975YJM975 rho YJM975/Y12 G1 d85	YPD	35	D	YPD_35	YJM975YJM975	YJM975/Y12	275730
8	26	YJM975YJM975 rho YJM975/Y12 G1 d90	YPD	35	D	YPD_35	YJM975YJM975	YJM975/Y12	239115
9	26	YJM975YJM975 rho YJM975/Y12 G1 d118	YPD	35	D	YPD_35	YJM975YJM975	YJM975/Y12	256746
10	26	YJM975YJM975 rho YJM975/Y12 G1 d130	YPD	35	D	YPD_35	YJM975YJM975	YJM975/Y12	247992
11	26	YJM975YJM975 rho YJM975/Y12 G1 d95	YPD	35	D	YPD_35	YJM975YJM975	YJM975/Y12	239659
12	26	YJM975YJM975 rho YJM975/Y12 G1 d87	YPD	35	D	YPD_35	YJM975YJM975	YJM975/Y12	256287
13	26	YJM975YJM975 rho YJM975/Y12 G1 d83	YPD	35	D	YPD_35	YJM975YJM975	YJM975/Y12	253056
14	26	YJM975YJM975 rho YJM975/Y12 G1 d105	YPD	35	D	YPD_35	YJM975YJM975	YJM975/Y12	254188
15	26	YJM975YJM975 rho YJM975/Y12 G1 d106	YPD	35	D	YPD_35	YJM975YJM975	YJM975/Y12	247576
16	26	YJM975YJM975 rho YJM975/Y12 G1 d87	YPD	35	D	YPD_35	YJM975YJM975	YJM975/Y12	261124
17	26	YJM975YJM975 rho YJM975/Y12 G1 d107	YPD	35	D	YPD_35	YJM975YJM975	YJM975/Y12	242697
18	26	YJM975YJM975 rho YJM975/Y12 G1 d102	YPD	35	D	YPD_35	YJM975YJM975	YJM975/Y12	244421
19	26	YJM975YJM975 rho YJM975/Y12 G1 d124	YPD	35	D	YPD_35	YJM975YJM975	YJM975/Y12	231810
20	26	YJM975YJM975 rho YJM975/Y12 G1 d128	YPD	35	D	YPD_35	YJM975YJM975	YJM975/Y12	239421
21	26	YJM975YJM975 rho Y12 control d1	YPD	35	D	YPD_35	YJM975YJM975	Y12	262203
22	26	YJM975YJM975 rho YJM975/Y12 G1 d95	YPD	35	D	YPD_35	YJM975YJM975	YJM975/Y12	246610
23	26	YJM975YJM975 rho YJM975/Y12 G1 d91	YPD	35	D	YPD_35	YJM975YJM975	YJM975/Y12	253568
24	26	YJM975YJM975 rho YJM975/Y12 G1 d117	YPD	35	D	YPD_35	YJM975YJM975	YJM975/Y12	243058
25	26	YJM975YJM975 rho YJM975/Y12 G1 d90	YPD	35	D	YPD_35	YJM975YJM975	YJM975/Y12	248846
26	26	YJM975YJM975 rho YJM975/Y12 G1 d108	YPD	35	D	YPD_35	YJM975YJM975	YJM975/Y12	254656
27	26	YJM975YJM975 rho YJM975/Y12 G1 d102	YPD	35	D	YPD_35	YJM975YJM975	YJM975/Y12	237658
28	26	YJM975YJM975 rho YJM975/Y12 G1 d91	YPD	35	D	YPD_35	YJM975YJM975	YJM975/Y12	258384
29	26	YJM975YJM975 rho YJM975 control d2	YPD	35	D	YPD_35	YJM975YJM975	YJM975	238356
30	26	YJM975YJM975 rho YJM975/Y12 G1 d110	YPD	35	D	YPD_35	YJM975YJM975	YJM975/Y12	238066
3	27	YJM975YJM975 rho YJM975/Y12 G1 d92	YPD	35	D	YPD_35	YJM975YJM975	YJM975/Y12	206618
4	27	YJM975YJM975 rho YJM975/Y12 G1 d132	YPD	35	D	YPD_35	YJM975YJM975	YJM975/Y12	232026
5	27	YJM975YJM975 rho YJM975/Y12 G1 d106	YPD	35	D	YPD_35	YJM975YJM975	YJM975/Y12	240137
6	27	YJM975YJM975 rho YJM975/Y12 G1 d85	YPD	35	D	YPD_35	YJM975YJM975	YJM975/Y12	263207
7	27	by	YPD	35	D	YPD_35	by	by	253283
8	27	YJM975YJM975 rho YJM975/Y12 G1 d87	YPD	35	D	YPD_35	YJM975YJM975	YJM975/Y12	270371
9	27	YJM975YJM975 rho YJM975 control d1	YPD	35	D	YPD_35	YJM975YJM975	YJM975	265514
10	27	YJM975YJM975 rho Y12 control d2	YPD	35	D	YPD_35	YJM975YJM975	Y12	268793
11	27	YJM975YJM975 rho YJM975/Y12 G1 d123	YPD	35	D	YPD_35	YJM975YJM975	YJM975/Y12	254508
12	27	YJM975YJM975 rho YJM975/Y12 G1 d100	YPD	35	D	YPD_35	YJM975YJM975	YJM975/Y12	259502
13	27	YJM975YJM975 rho YJM975/Y12 G1 d97	YPD	35	D	YPD_35	YJM975YJM975	YJM975/Y12	247189
14	27	by	YPD	35	D	YPD_35	by	by	252983
15	27	YJM975YJM975 rho YJM975/Y12 G1 d97	YPD	35	D	YPD_35	YJM975YJM975	YJM975/Y12	249848
16	27	YJM975YJM975 rho YJM975/Y12 G1 d88	YPD	35	D	YPD_35	YJM975YJM975	YJM975/Y12	255518
17	27	by	YPD	35	D	YPD_35	by	by	256233
18	27	YJM975YJM975 rho YJM975/Y12 G1 d102	YPD	35	D	YPD_35	YJM975YJM975	YJM975/Y12	224820
19	27	YJM975YJM975 rho Y12 control d1	YPD	35	D	YPD_35	YJM975YJM975	Y12	249778
20	27	YJM975YJM975 rho YJM975/Y12 G1 d83	YPD	35	D	YPD_35	YJM975YJM975	YJM975/Y12	239348
21	27	YJM975YJM975 rho YJM975/Y12 G1 d91	YPD	35	D	YPD_35	YJM975YJM975	YJM975/Y12	243215
22	27	YJM975YJM975 rho YJM975/Y12 G1 d86	YPD	35	D	YPD_35	YJM975YJM975	YJM975/Y12	243250
23	27	YJM975YJM975 rho YJM975/Y12 G1 d114	YPD	35	D	YPD_35	YJM975YJM975	YJM975/Y12	241943
24	27	YJM975YJM975 rho YJM975/Y12 G1 d119	YPD	35	D	YPD_35	YJM975YJM975	YJM975/Y12	248596
25	27	YJM975YJM975 rho YJM975/Y12 G1 d112	YPD	35	D	YPD_35	YJM975YJM975	YJM975/Y12	253492
26	27	YJM975YJM975 rho YJM975/Y12 G1 d95	YPD	35	D	YPD_35	YJM975YJM975	YJM975/Y12	248490
27	27	YJM975YJM975 rho YJM975/Y12 G1 d122	YPD	35	D	YPD_35	YJM975YJM975	YJM975/Y12	241100
28	27	YJM975YJM975 rho YJM975/Y12 G1 d117	YPD	35	D	YPD_35	YJM975YJM975	YJM975/Y12	233431
29	27	YJM975YJM975 rho YJM975/Y12 G1 d119	YPD	35	D	YPD_35	YJM975YJM975	YJM975/Y12	239097
30	27	YJM975YJM975 rho YJM975/Y12 G1 d110	YPD	35	D	YPD_35	YJM975YJM975	YJM975/Y12	229705
3	28	YJM975YJM975 rho YJM975/Y12 G1 d101	YPD	35	D	YPD_35	YJM975YJM975	YJM975/Y12	231837
4	28	YJM975YJM975 rho YJM975/Y12 G1 d106	YPD	35	D	YPD_35	YJM975YJM975	YJM975/Y12	231587
5	28	YJM975YJM975 rho YJM975/Y12 G1 d100	YPD	35	D	YPD_35	YJM975YJM975	YJM975/Y12	244039
6	28	YJM975YJM975 rho YJM975/Y12 G1 d110	YPD	35	D	YPD_35	YJM975YJM975	YJM975/Y12	246885
7	28	YJM975YJM975 rho YJM975/Y12 G1 d108	YPD	35	D	YPD_35	YJM975YJM975	YJM975/Y12	262965
8	28	YJM975YJM975 rho YJM975/Y12 G1 d101	YPD	35	D	YPD_35	YJM975YJM975	YJM975/Y12	250049
9	28	YJM975YJM975 rho YJM975/Y12 G1 d83	YPD	35	D	YPD_35	YJM975YJM975	YJM975/Y12	255283
10	28	YJM975YJM975 rho YJM975/Y12 G1 d96	YPD	35	D	YPD_35	YJM975YJM975	YJM975/Y12	245894
11	28	by	YPD	35	D	YPD_35	by	by	248640
12	28	YJM975YJM975 rho YJM975/Y12 G1 d119	YPD	35	D	YPD_35	YJM975YJM975	YJM975/Y12	240596
13	28	YJM975YJM975 rho Y12 control d2	YPD	35	D	YPD_35	YJM975YJM975	Y12	261436
14	28	YJM975YJM975 rho Y12 control d2	YPD	35	D	YPD_35	YJM975YJM975	Y12	258401
15	28	YJM975YJM975 rho YJM975/Y12 G1 d132	YPD	35	D	YPD_35	YJM975YJM975	YJM975/Y12	248777
16	28	YJM975YJM975 rho YJM975/Y12 G1 d86	YPD	35	D	YPD_35	YJM975YJM975	YJM975/Y12	255960
17	28	YJM975YJM975 rho YJM975/Y12 G1 d112	YPD	35	D	YPD_35	YJM975YJM975	YJM975/Y12	240862
18	28	YJM975YJM975 rho YJM975/Y12 G1 d113	YPD	35	D	YPD_35	YJM975YJM975	YJM975/Y12	249151
19	28	YJM975YJM975 rho YJM975/Y12 G1 d102	YPD	35	D	YPD_35	YJM975YJM975	YJM975/Y12	231043
20	28	YJM975YJM975 rho YJM975/Y12 G1 d116	YPD	35	D	YPD_35	YJM975YJM975	YJM975/Y12	244752
21	28	YJM975YJM975 rho YJM975 control d1	YPD	35	D	YPD_35	YJM975YJM975	YJM975	245307
22	28	YJM975YJM975 rho YJM975/Y12 G1 d109	YPD	35	D	YPD_35	YJM975YJM975	YJM975/Y12	245203
23	28	YJM975YJM975 rho YJM975/Y12 G1 d118	YPD	35	D	YPD_35	YJM975YJM975	YJM975/Y12	248773
24	28	YJM975YJM975 rho YJM975/Y12 G1 d95	YPD	35	D	YPD_35	YJM975YJM975	YJM975/Y12	240161
25	28	YJM975YJM975 rho YJM975/Y12 G1 d109	YPD	35	D	YPD_35	YJM975YJM975	YJM975/Y12	230200
26	28	YJM975YJM975 rho YJM975/Y12 G1 d108	YPD	35	D	YPD_35	YJM975YJM975	YJM975/Y12	249756
27	28	YJM975YJM975 rho YJM975/Y12 G1 d101	YPD	35	D	YPD_35	YJM975YJM975	YJM975/Y12	247901
28	28	YJM975YJM975 rho YJM975/Y12 G1 d100	YPD	35	D	YPD_35	YJM975YJM975	YJM975/Y12	256362
29	28	YJM975YJM975 rho YJM975/Y12 G1 d98	YPD	35	D	YPD_35	YJM975YJM975	YJM975/Y12	242137
30	28	YJM975YJM975 rho YJM975/Y12 G1 d97	YPD	35	D	YPD_35	YJM975YJM975	YJM975/Y12	228133
3	29	YJM975YJM975 rho YJM975/Y12 G1 d97	YPD	35	D	YPD_35	YJM975YJM975	YJM975/Y12	216831
4	29	YJM975YJM975 rho YJM975/Y12 G1 d101	YPD	35	D	YPD_35	YJM975YJM975	YJM975/Y12	235986
5	29	YJM975YJM975 rho YJM975/Y12 G1 d124	YPD	35	D	YPD_35	YJM975YJM975	YJM975/Y12	238239
6	29	by	YPD	35	D	YPD_35	by	by	254982
7	29	YJM975YJM975 rho YJM975/Y12 G1 d105	YPD	35	D	YPD_35	YJM975YJM975	YJM975/Y12	251047
8	29	YJM975YJM975 rho YJM975/Y12 G1 d102	YPD	35	D	YPD_35	YJM975YJM975	YJM975/Y12	268158
9	29	YJM975YJM975 rho YJM975/Y12 G1 d118	YPD	35	D	YPD_35	YJM975YJM975	YJM975/Y12	254208
10	29	YJM975YJM975 rho Y12 control d1	YPD	35	D	YPD_35	YJM975YJM975	Y12	272527
11	29	YJM975YJM975 rho YJM975/Y12 G1 d116	YPD	35	D	YPD_35	YJM975YJM975	YJM975/Y12	247012
12	29	YJM975YJM975 rho YJM975/Y12 G1 d118	YPD	35	D	YPD_35	YJM975YJM975	YJM975/Y12	266385
13	29	YJM975YJM975 rho YJM975/Y12 G1 d105	YPD	35	D	YPD_35	YJM975YJM975	YJM975/Y12	251784
14	29	YJM975YJM975 rho YJM975/Y12 G1 d114	YPD	35	D	YPD_35	YJM975YJM975	YJM975/Y12	247355
15	29	YJM975YJM975 rho YJM975/Y12 G1 d115	YPD	35	D	YPD_35	YJM975YJM975	YJM975/Y12	254457
16	29	YJM975YJM975 rho YJM975/Y12 G1 d101	YPD	35	D	YPD_35	YJM975YJM975	YJM975/Y12	257655
17	29	YJM975YJM975 rho YJM975/Y12 G1 d115	YPD	35	D	YPD_35	YJM975YJM975	YJM975/Y12	265202
18	29	YJM975YJM975 rho YJM975/Y12 G1 d95	YPD	35	D	YPD_35	YJM975YJM975	YJM975/Y12	240991
19	29	by	YPD	35	D	YPD_35	by	by	248953
20	29	YJM975YJM975 rho YJM975/Y12 G1 d103	YPD	35	D	YPD_35	YJM975YJM975	YJM975/Y12	240974
21	29	YJM975YJM975 rho YJM975/Y12 G1 d113	YPD	35	D	YPD_35	YJM975YJM975	YJM975/Y12	252075
22	29	YJM975YJM975 rho YJM975/Y12 G1 d128	YPD	35	D	YPD_35	YJM975YJM975	YJM975/Y12	241278
23	29	YJM975YJM975 rho YJM975/Y12 G1 d130	YPD	35	D	YPD_35	YJM975YJM975	YJM975/Y12	235658
24	29	YJM975YJM975 rho YJM975/Y12 G1 d96	YPD	35	D	YPD_35	YJM975YJM975	YJM975/Y12	241802
25	29	YJM975YJM975 rho YJM975/Y12 G1 d102	YPD	35	D	YPD_35	YJM975YJM975	YJM975/Y12	252403
26	29	YJM975YJM975 rho YJM975/Y12 G1 d101	YPD	35	D	YPD_35	YJM975YJM975	YJM975/Y12	243142
27	29	YJM975YJM975 rho YJM975/Y12 G1 d108	YPD	35	D	YPD_35	YJM975YJM975	YJM975/Y12	250601
28	29	YJM975YJM975 rho YJM975/Y12 G1 d91	YPD	35	D	YPD_35	YJM975YJM975	YJM975/Y12	239538
29	29	YJM975YJM975 rho YJM975/Y12 G1 d94	YPD	35	D	YPD_35	YJM975YJM975	YJM975/Y12	223713
3	30	YJM975YJM975 rho YJM975 control d2	YPD	35	D	YPD_35	YJM975YJM975	YJM975	229567
4	30	YJM975YJM975 rho YJM975/Y12 G1 d85	YPD	35	D	YPD_35	YJM975YJM975	YJM975/Y12	238715
5	30	YJM975YJM975 rho YJM975/Y12 G1 d87	YPD	35	D	YPD_35	YJM975YJM975	YJM975/Y12	245131
6	30	YJM975YJM975 rho YJM975/Y12 G1 d119	YPD	35	D	YPD_35	YJM975YJM975	YJM975/Y12	233971
7	30	YJM975YJM975 rho YJM975/Y12 G1 d102	YPD	35	D	YPD_35	YJM975YJM975	YJM975/Y12	249022
8	30	YJM975YJM975 rho YJM975/Y12 G1 d100	YPD	35	D	YPD_35	YJM975YJM975	YJM975/Y12	247370
10	30	YJM975YJM975 rho YJM975/Y12 G1 d114	YPD	35	D	YPD_35	YJM975YJM975	YJM975/Y12	238510
11	30	YJM975YJM975 rho YJM975/Y12 G1 d95	YPD	35	D	YPD_35	YJM975YJM975	YJM975/Y12	264844
12	30	YJM975YJM975 rho YJM975/Y12 G1 d119	YPD	35	D	YPD_35	YJM975YJM975	YJM975/Y12	254844
13	30	YJM975YJM975 rho YJM975/Y12 G1 d104	YPD	35	D	YPD_35	YJM975YJM975	YJM975/Y12	263705
14	30	YJM975YJM975 rho Y12 control d1	YPD	35	D	YPD_35	YJM975YJM975	Y12	251334
15	30	YJM975YJM975 rho YJM975/Y12 G1 d123	YPD	35	D	YPD_35	YJM975YJM975	YJM975/Y12	259785
16	30	YJM975YJM975 rho YJM975/Y12 G1 d101	YPD	35	D	YPD_35	YJM975YJM975	YJM975/Y12	253158
17	30	YJM975YJM975 rho YJM975/Y12 G1 d122	YPD	35	D	YPD_35	YJM975YJM975	YJM975/Y12	238447
18	30	YJM975YJM975 rho Y12 control d2	YPD	35	D	YPD_35	YJM975YJM975	Y12	262701
19	30	YJM975YJM975 rho YJM975/Y12 G1 d109	YPD	35	D	YPD_35	YJM975YJM975	YJM975/Y12	242622
20	30	YJM975YJM975 rho YJM975/Y12 G1 d88	YPD	35	D	YPD_35	YJM975YJM975	YJM975/Y12	245126
21	30	YJM975YJM975 rho YJM975/Y12 G1 d102	YPD	35	D	YPD_35	YJM975YJM975	YJM975/Y12	234886
22	30	YJM975YJM975 rho YJM975/Y12 G1 d88	YPD	35	D	YPD_35	YJM975YJM975	YJM975/Y12	233811
23	30	YJM975YJM975 rho YJM975/Y12 G1 d89	YPD	35	D	YPD_35	YJM975YJM975	YJM975/Y12	232556
24	30	YJM975YJM975 rho YJM975/Y12 G1 d123	YPD	35	D	YPD_35	YJM975YJM975	YJM975/Y12	237618
25	30	YJM975YJM975 rho YJM975/Y12 G1 d113	YPD	35	D	YPD_35	YJM975YJM975	YJM975/Y12	234579
26	30	YJM975YJM975 rho YJM975/Y12 G1 d108	YPD	35	D	YPD_35	YJM975YJM975	YJM975/Y12	242151
27	30	YJM975YJM975 rho YJM975/Y12 G1 d85	YPD	35	D	YPD_35	YJM975YJM975	YJM975/Y12	252976
28	30	YJM975YJM975 rho YJM975/Y12 G1 d90	YPD	35	D	YPD_35	YJM975YJM975	YJM975/Y12	237958
29	30	YJM975YJM975 rho YJM975/Y12 G1 d101	YPD	35	D	YPD_35	YJM975YJM975	YJM975/Y12	241558
30	30	YJM975YJM975 rho YJM975/Y12 G1 d94	YPD	35	D	YPD_35	YJM975YJM975	YJM975/Y12	218608
3	31	YJM975YJM975 rho YJM975/Y12 G1 d103	YPD	35	D	YPD_35	YJM975YJM975	YJM975/Y12	213892
4	31	YJM975YJM975 rho YJM975/Y12 G1 d85	YPD	35	D	YPD_35	YJM975YJM975	YJM975/Y12	235110
5	31	YJM975YJM975 rho YJM975/Y12 G1 d90	YPD	35	D	YPD_35	YJM975YJM975	YJM975/Y12	239603
6	31	YJM975YJM975 rho YJM975/Y12 G1 d89	YPD	35	D	YPD_35	YJM975YJM975	YJM975/Y12	258075
7	31	YJM975YJM975 rho YJM975/Y12 G1 d89	YPD	35	D	YPD_35	YJM975YJM975	YJM975/Y12	256346
8	31	YJM975YJM975 rho YJM975/Y12 G1 d89	YPD	35	D	YPD_35	YJM975YJM975	YJM975/Y12	248789
9	31	YJM975YJM975 rho YJM975/Y12 G1 d113	YPD	35	D	YPD_35	YJM975YJM975	YJM975/Y12	256888
10	31	YJM975YJM975 rho YJM975/Y12 G1 d92	YPD	35	D	YPD_35	YJM975YJM975	YJM975/Y12	263430
11	31	YJM975YJM975 rho YJM975/Y12 G1 d119	YPD	35	D	YPD_35	YJM975YJM975	YJM975/Y12	253036
12	31	YJM975YJM975 rho YJM975/Y12 G1 d112	YPD	35	D	YPD_35	YJM975YJM975	YJM975/Y12	258266
13	31	by	YPD	35	D	YPD_35	by	by	265241
14	31	YJM975YJM975 rho YJM975/Y12 G1 d94	YPD	35	D	YPD_35	YJM975YJM975	YJM975/Y12	249519
15	31	YJM975YJM975 rho YJM975/Y12 G1 d117	YPD	35	D	YPD_35	YJM975YJM975	YJM975/Y12	250484
16	31	YJM975YJM975 rho YJM975/Y12 G1 d112	YPD	35	D	YPD_35	YJM975YJM975	YJM975/Y12	244313
17	31	YJM975YJM975 rho YJM975/Y12 G1 d89	YPD	35	D	YPD_35	YJM975YJM975	YJM975/Y12	254129
18	31	YJM975YJM975 rho YJM975/Y12 G1 d109	YPD	35	D	YPD_35	YJM975YJM975	YJM975/Y12	234280
19	31	YJM975YJM975 rho YJM975/Y12 G1 d94	YPD	35	D	YPD_35	YJM975YJM975	YJM975/Y12	246742
20	31	YJM975YJM975 rho YJM975/Y12 G1 d130	YPD	35	D	YPD_35	YJM975YJM975	YJM975/Y12	250748
21	31	YJM975YJM975 rho YJM975 control d2	YPD	35	D	YPD_35	YJM975YJM975	YJM975	239388
22	31	YJM975YJM975 rho Y12 control d1	YPD	35	D	YPD_35	YJM975YJM975	Y12	257937
23	31	YJM975YJM975 rho YJM975/Y12 G1 d127	YPD	35	D	YPD_35	YJM975YJM975	YJM975/Y12	238985
24	31	YJM975YJM975 rho YJM975/Y12 G1 d129	YPD	35	D	YPD_35	YJM975YJM975	YJM975/Y12	253160
25	31	YJM975YJM975 rho YJM975/Y12 G1 d118	YPD	35	D	YPD_35	YJM975YJM975	YJM975/Y12	232585
26	31	YJM975YJM975 rho YJM975/Y12 G1 d123	YPD	35	D	YPD_35	YJM975YJM975	YJM975/Y12	224526
27	31	YJM975YJM975 rho YJM975/Y12 G1 d106	YPD	35	D	YPD_35	YJM975YJM975	YJM975/Y12	235365
28	31	YJM975YJM975 rho YJM975/Y12 G1 d92	YPD	35	D	YPD_35	YJM975YJM975	YJM975/Y12	243717
29	31	YJM975YJM975 rho YJM975/Y12 G1 d88	YPD	35	D	YPD_35	YJM975YJM975	YJM975/Y12	242209
30	31	YJM975YJM975 rho YJM975 control d1	YPD	35	D	YPD_35	YJM975YJM975	YJM975	231440
3	32	YJM975YJM975 rho YJM975/Y12 G1 d116	YPD	35	D	YPD_35	YJM975YJM975	YJM975/Y12	210361
4	32	YJM975YJM975 rho YJM975/Y12 G1 d104	YPD	35	D	YPD_35	YJM975YJM975	YJM975/Y12	233967
5	32	YJM975YJM975 rho YJM975/Y12 G1 d105	YPD	35	D	YPD_35	YJM975YJM975	YJM975/Y12	233307
6	32	YJM975YJM975 rho Y12 control d2	YPD	35	D	YPD_35	YJM975YJM975	Y12	250094
7	32	YJM975YJM975 rho Y12 control d1	YPD	35	D	YPD_35	YJM975YJM975	Y12	256656
8	32	YJM975YJM975 rho YJM975/Y12 G1 d108	YPD	35	D	YPD_35	YJM975YJM975	YJM975/Y12	255830
9	32	YJM975YJM975 rho YJM975/Y12 G1 d124	YPD	35	D	YPD_35	YJM975YJM975	YJM975/Y12	252122
10	32	YJM975YJM975 rho YJM975/Y12 G1 d126	YPD	35	D	YPD_35	YJM975YJM975	YJM975/Y12	258169
11	32	YJM975YJM975 rho YJM975/Y12 G1 d110	YPD	35	D	YPD_35	YJM975YJM975	YJM975/Y12	278927
12	32	YJM975YJM975 rho YJM975/Y12 G1 d88	YPD	35	D	YPD_35	YJM975YJM975	YJM975/Y12	273181
13	32	YJM975YJM975 rho YJM975/Y12 G1 d98	YPD	35	D	YPD_35	YJM975YJM975	YJM975/Y12	249762
14	32	YJM975YJM975 rho YJM975/Y12 G1 d96	YPD	35	D	YPD_35	YJM975YJM975	YJM975/Y12	250607
15	32	YJM975YJM975 rho YJM975/Y12 G1 d122	YPD	35	D	YPD_35	YJM975YJM975	YJM975/Y12	265568
16	32	by	YPD	35	D	YPD_35	by	by	260076
17	32	YJM975YJM975 rho YJM975/Y12 G1 d118	YPD	35	D	YPD_35	YJM975YJM975	YJM975/Y12	247285
18	32	YJM975YJM975 rho YJM975/Y12 G1 d118	YPD	35	D	YPD_35	YJM975YJM975	YJM975/Y12	246272
19	32	YJM975YJM975 rho YJM975/Y12 G1 d104	YPD	35	D	YPD_35	YJM975YJM975	YJM975/Y12	245500
20	32	YJM975YJM975 rho YJM975/Y12 G1 d95	YPD	35	D	YPD_35	YJM975YJM975	YJM975/Y12	232903
21	32	YJM975YJM975 rho YJM975/Y12 G1 d112	YPD	35	D	YPD_35	YJM975YJM975	YJM975/Y12	245394
22	32	YJM975YJM975 rho YJM975/Y12 G1 d104	YPD	35	D	YPD_35	YJM975YJM975	YJM975/Y12	240570
23	32	by	YPD	35	D	YPD_35	by	by	248713
24	32	YJM975YJM975 rho YJM975/Y12 G1 d107	YPD	35	D	YPD_35	YJM975YJM975	YJM975/Y12	242535
25	32	YJM975YJM975 rho YJM975/Y12 G1 d105	YPD	35	D	YPD_35	YJM975YJM975	YJM975/Y12	214655
26	32	YJM975YJM975 rho YJM975/Y12 G1 d129	YPD	35	D	YPD_35	YJM975YJM975	YJM975/Y12	255198
[truncated: 19,323 more rows]
